# Supplementary material for: The chromosome-level reference genome assembly for Panax notoginseng and insights into ginsenoside biosynthesis
Source: PubMed Central journal article supplement — Plant Commun. 2020 Sep 20;2(1):100113. doi: 10.1016/j.xplc.2020.100113 (PMC7816079; doi:10.1016/j.xplc.2020.100113), 2020-09-20
Supplement: mmc1.pdf [file mmc1.pdf]

**Plant Communications, Volume 2**

## **Supplemental Information**

### **The chromosome-level reference genome assembly for *Panax notoginseng* and insights into ginsenoside biosynthesis**

**Zhouqian Jiang, Lichan Tu, Weifei Yang, Yifeng Zhang, Tianyuan Hu, Baowei Ma, Yun Lu, Xiuming Cui, Jie Gao, Xiaoyi Wu, Yuru Tong, Jiawei Zhou, Yadi Song, Yuan Liu, Nan Liu, Luqi Huang, and Wei Gao**

# Supporting Information Appendix

## The Chromosome-level Reference genome Assembly for *Panax notoginseng* and Insights into Ginsenoside Biosynthesis

Zhouqian Jiang<sup>1</sup>, Lichan Tu<sup>1,2</sup>, Weifei Yang<sup>3</sup>, Yifeng Zhang<sup>1,2</sup>, Tianyuan Hu<sup>1</sup>, Baowei Ma<sup>1</sup>, Yun Lu<sup>1</sup>, Xiuming Cui<sup>4</sup>, Yuru Tong<sup>2</sup>, Jie Gao<sup>1</sup>, Xiaoyi Wu<sup>1</sup>, Jiawei Zhou<sup>1</sup>, Yadi Song<sup>1</sup>, Yuan Liu<sup>1</sup>, Nan Liu<sup>1</sup>, Luqi Huang<sup>5</sup>, Wei Gao<sup>1,2,6\*</sup>

<sup>1</sup>School of Traditional Chinese Medicine, Capital Medical University, Beijing, China

<sup>2</sup>School of Pharmaceutical Sciences, Capital Medical University, Beijing, China

<sup>3</sup>Annoroad Gene Technology, Beijing, China

<sup>4</sup>Faculty of Life Science and Technology, Kunming University of Science and Technology, Kunming, China

<sup>5</sup>State Key Laboratory Breeding Base of Dao-di Herbs, National Resource Center for Chinese Materia Medica, China Academy of Chinese Medical Sciences, Beijing, China

<sup>6</sup>Advanced Innovation Center for Human Brain Protection, Capital Medical University, Beijing, China

\*Corresponding Authors:

Wei Gao: weigao@ccmu.edu.cn

Luqi Huang: huangluqi01@126.com

Tel/Fax: 010-83916572

|    |                                                                                      |
|----|--------------------------------------------------------------------------------------|
| 26 | <b>Table of contents</b>                                                             |
| 27 | <b>Supplementary Section S1 - Genome sequencing, assembly and evaluation</b>         |
| 28 | 1.1 Plant materials                                                                  |
| 29 | 1.2 Estimation of genome size using <i>k-mer</i> analysis                            |
| 30 | 1.3 Library construction and genome sequencing                                       |
| 31 | 1.4 Genome assembly                                                                  |
| 32 | 1.5 Evaluation of assembly quality                                                   |
| 33 |                                                                                      |
| 34 | <b>Supplementary Section S2 - Genome Annotation</b>                                  |
| 35 | 2.1 Transcriptome sequencing                                                         |
| 36 | 2.2 Annotation of repeat sequences                                                   |
| 37 | 2.3 Functional annotation protein-coding genes                                       |
| 38 | 2.4 Annotation of noncoding RNA genes                                                |
| 39 |                                                                                      |
| 40 | <b>Supplementary Section S3 - Evolution and cluster of gene family</b>               |
| 41 | 3.1 Identification of gene families                                                  |
| 42 | 3.2 Phylogenetic tree and divergence estimation                                      |
| 43 | 3.3 Expansion and contraction of gene family                                         |
| 44 |                                                                                      |
| 45 | <b>Supplementary Section S4 - Analysis of whole-genome duplication</b>               |
| 46 | 4.1 Identification of WGD events of <i>P. notoginseng</i>                            |
| 47 | 4.2 Estimate the timing of the WGD event in <i>P. notoginseng</i>                    |
| 48 |                                                                                      |
| 49 | <b>Supplementary Section S5 - Analysis of genes related to terpenes biosynthesis</b> |
| 50 | <b>pathway</b>                                                                       |
| 51 | 5.1 Identification and phylogenetic analysis of genes                                |
| 52 | 5.2 Analysis of the duplication of homologous gene pairs                             |
| 53 |                                                                                      |
| 54 | <b>Supplementary Section S6 - Transcriptomic analysis and transcription factor</b>   |
| 55 | <b>regulation</b>                                                                    |

|    |                                                                                           |
|----|-------------------------------------------------------------------------------------------|
| 56 | 6.1 Sample collections and RNA isolation of tissue transcriptome                          |
| 57 | 6.2 RNA sequencing and assembly                                                           |
| 58 | 6.3 Transcriptome analysis                                                                |
| 59 | 6.4 Analysis of saponin biosynthesis and regulation mechanism                             |
| 60 |                                                                                           |
| 61 | <b>Supplementary Section S7 - Analyzing key enzyme genes of ginsenosides pathway</b>      |
| 62 | <b>and functional verification of UGT genes</b>                                           |
| 63 | 7.1 Phylogenetic analysis of UGT and CYP450 genes                                         |
| 64 | 7.2 Function verification of candidate UGT genes                                          |
| 65 | 7.2.1 Gene cloning and expression vector construction                                     |
| 66 | 7.2.2 Induced protein expression and functional verification                              |
| 67 | 7.3 Screen for candidate UGT genes involved in the saponin biosynthetic pathway           |
| 68 | 7.3.1 WGCAN analysis of UGT genes                                                         |
| 69 | 7.3.2 Identification and expression profiling of genes related to terpenoids biosynthesis |
| 70 |                                                                                           |
| 71 | <b>Supplementary URLs</b>                                                                 |
| 72 |                                                                                           |
| 73 | <b>References</b>                                                                         |
| 74 |                                                                                           |
| 75 | <b>Supplementary Figures</b>                                                              |
| 76 |                                                                                           |
| 77 | <b>Supplementary Tables</b>                                                               |
| 78 |                                                                                           |

## 79 **Supplementary Section S1 - Genome sequencing, assembly and evaluation**

80

### 81 **1.1 Plant materials**

82 The *P. notoginseng* plant used for genome sequencing were collected from Wenshan  
83 County, Yunnan Province, China in August 2019. Fresh and healthy leaves were  
84 harvested and immediately frozen on liquid nitrogen after collection, followed by the  
85 preservation at -80°C in the laboratory prior to DNA extraction.

86

### 87 **1.2 Estimation of genome size using *K*-mer analysis**

88 To estimation the genome size of *P. notoginseng* by using the *K*-mer analysis, we  
89 selected 231.06 Gb pair-end reads and generated the *21*-mer frequency distribution. The  
90 distribution of the *21*-mer depends on the characteristics of the genome and follows a  
91 Poisson's distribution. We estimated that the genome size was 1.67 Gb. Based on the  
92 *21*-mer analysis, we also estimated the heterozygosity ratio and the proportion of  
93 repeated sequences in the genome, which were 0.21% and 70.09% respectively  
94 (**Supplementary Table 1**). Considering that the higher repetitive sequence of the  
95 genome may lead to inaccurate *K*-mer analysis, we chose *K*=35 for a second prediction  
96 and finally the genome size was estimated to be 2.35Gb (**Supplementary Figure 1**).

97

### 98 **1.3 Library construction and genome sequencing**

99 High-quality genomic DNA was extracted from the leaves using a phenol chloroform  
100 isoamyl alcohol extraction method. The quality and quantity of the isolated DNA were  
101 separated checked by Nanophotometer® (IMPLEN, CA, USA) and Qubit® 2.0  
102 Fluorometer (Life Technologies, CA, USA). Then the genomic DNA was broken into  
103 random fragments. DNA sequencing libraries were constructed according to the  
104 standard Illumina library preparation protocols. Paired-end library with insert size of  
105 350 bp was constructed according to the manufacturer's instructions (Illumina, San  
106 Diego, CA). The constructed library was sequenced using Illumina HiSeq X Ten  
107 Platform by following the standard Illumina protocols. After filtering out the adapter  
108 sequences and the low-quality and duplicated reads, we obtained a total of 231.06

109 Gb(~86.86x) of clean data.

110 For PacBio libraries (English et al., 2012), we needed at least 10 µg of sheared DNA.  
111 The whole genome was sequenced on the PacBio Sequel System (**Supplementary**  
112 **URLs**) based on the single-molecular real-time (SMRT) sequencing technology. The  
113 template library was constructed using SMRTbell Template Prep Kit 1.0 (product code  
114 100-259-100) and SMRTbell Damage Repair Kit (product code 100-465-900).  
115 Following the procedure described in the PacBio brochure, the high-quality DNA was  
116 fragmented and concentrated. The fragments were bead-purified, damage-repaired, and  
117 used as the ~20 kb SMRTbell templates. A total of 284.07 Gb (~106.79x) of data were  
118 obtained.

119 DNA from young leaves of the same *P. notoginseng* plant was used to constructed  
120 the Hi-C library. Grind the sample with 2% formaldehyde to fix the chromatin. After  
121 the cross-linking of the sample was completed, leaf cell lysis was performed and  
122 chromatin digestion was performed using *Mbol* endonucleases. After biotin labeling,  
123 blunt end linking and DNA purification, Hi-C sample was prepared and entered into the  
124 standard library construction process (**Supplementary Figure 2**). After the constructed  
125 libraries were qualified by quality controlling, Illumina HiSeq X Ten was used for  
126 sequencing and the sequencing strategy used was PE150. Finally, a total of 340.83 Gb  
127 (~128.13x) data was retained (**Supplementary Table 2**).

128

#### 129 **1.4 Genome assembly**

130 The reads exported by Sequel II™ Systems were quality evaluated with the in-built  
131 High-Quality Region Finder (HQRF) which identified the longest high quality regain  
132 each read generated by a singly-loaded DNA polymerase according to the ratio of signal  
133 to noise (Chakraborty et al., 2016; Hackl et al., 2014). The quality reads obtained were  
134 assembled into contigs using Canu (v1.5; **Supplementary URLs**) (Koren et al., 2017).  
135 The consensus genome was subjected to a final round of base-error correction (polish)  
136 by referring to the Illumina reads with BWA (v0.7.9a) and Pilon (v1.22; **Supplementary**  
137 **URLs**) (BJ et al., 2014). The total length of this assembly version was 2.66 Gb with a  
138 contig N50 size of 1.21 Mb. Then, the Hi-C sequencing data were aligned to the

139 assembled scaffold by BWA-mem and the contigs were clustered onto chromosomes  
140 with LACHESIS (**Supplementary URLs; Supplementary Table 3**), the final genome  
141 was 2.66 Gb and the contig and scaffold N50 were 1.12 Mb and 216.47 Mb respectively  
142 (**Table 1 and Supplementary Table 4**).

143

### 144 **1.5 Evaluation of assembly quality**

145 We applied three methods to evaluate the quality of our assembled genome. First, we  
146 mapped clean reads from Illumina PE libraries to the genome using BWA mem. The  
147 distribution of the sequencing depth at each position was calculated using SAMtools.  
148 Nearly 99.82% of the clean reads could be mapped to the assembly genome, which  
149 covered 97.97% of the assembled sequence (**Supplementary Table 5**). Second, the  
150 completeness of the genome was evaluated with BUSCO (Benchmarking Universal  
151 Single-Copy Orthologs, v3.0.1, default parameters; **Supplementary URLs**) (Simao et  
152 al., 2015) based on the homologous database. We found 96.6% complete BUSCOs in  
153 the *P. notoginseng* genome (**Supplementary Table 6**). Third, the RNA sequencing  
154 (RNA-seq) reads of *P. notoginseng* generated in this study were assembled using Trinity,  
155 and these samples came from different tissue of different parts of *P. notoginseng* plants.  
156 According to the mapping rate (mostly ranging from 94%~97%) of each sample, the  
157 assembly had good coverage of the gene regions. Collectively, BUSCO, short-insert  
158 size read mapping and transcriptome analysis proved the high quality of the genome  
159 assembly, which was adequate enough for subsequent genome analyses in this study.

160

## 161 **Supplementary Section S2 - Genome Annotation**

### 163 **2.1 Annotation of repeat sequences**

164 Repetitive sequences are an important part of the genome including two categories,  
165 tandem repeat and interspersed repeats. In this study, two strategies were used to predict  
166 the repetitive sequences, which were *de novo* approach and homology approach  
167 respectively. For the *de novo* approach, RepeatModeler (**Supplementary URLs**) was  
168 used in this strategy. *De novo* repeat sequence library was established firstly, and then  
169 repeat sequences were predicted by repeatmasker software RepeatScout  
170 (**Supplementary URLs**). In addition, the *ab initio* prediction method was also used to  
171 find tandem repeat sequences in the genome by the software Tandem Repeats Finder  
172 (TRF). For the homology-based approach, it was based on repeated sequence database  
173 Repbase. RepeatMasker (version 3.3.0; **Supplementary URLs**) and  
174 RepeatProteinMask used to predict sequences similar to known repeat sequences  
175 (**Supplementary Table 7**). According to the integrated statistics of the prediction  
176 results obtained above, the proportion of repetitive sequences in the *P. notoginseng*  
177 genome was 85.85%. The most abundant repetitive element repeat type was LTR, which  
178 accounted for 58.88% of the genome (**Supplementary Figure 3 and Supplementary**  
179 **Table 8**).

### 181 **2.2 Annotation of protein-coding genes**

182 We used homology-based prediction, *de novo* prediction and transcriptome-based  
183 prediction to predict the protein-coding genes in the *P. notoginseng* genome. Proteins  
184 from the four known species (*Arabidopsis thaliana*, *Daucus carota*, *Panax ginseng*, *P.*  
185 *notoginseng*-pub) were used as homology evidence to search against *P. notoginseng*  
186 genome using tblastn (evaluate 1e-5), and the gene structure were predicted by GeneWise  
187 with default parameter (**Supplementary URLs; Supplementary Figure 4**). For the *de*  
188 *nov*o prediction, software based on the statistical characteristics of genomic sequence  
189 data (such as codon frequency, exon-intron distribution) was used to predict gene  
190 structure. The software used in this study contained Augustus, SNAP and GeneMark



191 **(Supplementary URLs)**. To carry out the RNA-Seq aided gene prediction, clean RNA-  
192 Seq reads were assembled into transcripts using Trinity, then aligned to our genome  
193 assembly and predicted gene structure using PASA **(Supplementary URLs)**.  
194 Synthesizing the above forecast results, the gene sets predicted by various strategies  
195 were integrated into a non-redundant and more complete gene set by EVIDENCEModeler  
196 (EVM; **Supplementary URLs**). Finally, a total of 37,606 genes were predicted from  
197 the *P. notoginseng* genome **(Supplementary Table 9)**. By predicting the structure of  
198 the genes, we also obtained information of gene features such as the distributions of  
199 mRNA length, exon length, exon number, intron length and CDS length and so on  
200 **(Supplementary Table 10)**.

201

### 202 **2.3 Functional annotation protein-coding genes**

203 The function annotation of genes is mainly to compare the predicted gene sets with  
204 various functional databases, so that can able to understand the function of genes and  
205 their role in life activities. The protein database used in this study included Swissprot,  
206 NT, NR, PFAM, eggNOG, and GO **(Supplementary URLs)**. A total of 36,154 genes  
207 were predicted to be functional, accounting for 96.14% of all genes in the *P.*  
208 *notoginseng* genome **(Supplementary Table 11)**.

209

### 210 **2.4 Annotation of noncoding RNA genes**

211 Noncoding RNA, refers to RNA that can't translate into proteins, such as rRNA,  
212 tRNA, snRNA, miRNA and so on, all have important biological functions. miRNA can  
213 degrade its target gene or inhibit translation into protein, and play an important role for  
214 gene silencing. tRNA and rRNA directly participate in protein synthesis. As well as,  
215 snRNA mainly involves in the processing of RNA precursors, which is the important  
216 component of RNA shear body. By comparing with known noncoding RNA libraries,  
217 Rfam, we can obtain the prediction of rRNA, snRNA, miRNA and so on. The tRNA  
218 sequences in genome were predicted by the software tRNAscan-SE **(Supplementary**  
219 **URLs)**. Finally, we obtained 14,430 miRNA genes, 1513 tRNA genes, 3018 rRNA  
220 genes and 8174 snRNA genes in *P. notoginseng* genome **(Supplementary Table 12)**.

## 221 **Supplementary Section S3 - Evolution and cluster of gene family**

222

### 223 **3.1 Identification of gene families**

224 Using the OrthoMCL package (Li et al., 2003) (version 1.4), we identified the gene  
225 families (clusters) between *P. notoginseng* and seven other plant species, including *P.*  
226 *ginseng*, *D. carota*, *V. vinifera*, *C. annuum*, *G. uralensis*, *A. thaliana*, *O. sativa*. First,  
227 the gene set of each species was filtered (**Supplementary Figure 5 and**  
228 **Supplementary Table 13**). If there were multiple alternative splicing transcripts for a  
229 gene, only the transcript with the longest coding region was retained for further analysis.  
230 Second, in order to ensure the reliability of the encoded protein, genes encoding length  
231 less than 50 amino acids were excluded. Then, an all-vs-all BLASTP (version 2.2.28)  
232 was performed with an E-value threshold of 1e-5. Finally, clustering was conducted  
233 using the Markov cluster algorithm (MCL) integrated in the OrthoMCL package. In  
234 total, 27,501 gene families comprising 232,394 genes were identified among these eight  
235 plant species and used for subsequent comparative analysis. According to the  
236 classification results of gene families, specific gene families within species and gene  
237 families shared between species could be found. A total of 1072 gene families  
238 containing 2879 genes unique to the *P. notoginseng* genome were found  
239 (**Supplementary Figure 6**). To functionally annotate these unique genes, we performed  
240 Gene Ontology (GO) and KEGG pathway enrichment analysis by using Fisher's exact  
241 test with false discovery rate (FDR) corrections (**Supplementary Figure 7 and**  
242 **Supplementary Table 14**).

243

### 244 **3.2 Phylogenetic tree and divergence estimation**

245 After gene family clustering, we aligned all 458 single-copy gene protein sequences  
246 by MUSCLE (**Supplementary URLs**) (Edgar, 2004). Then the four-fold degenerate  
247 synonymous site (4DTv) were employed to construct phylogenetic trees. PhyML  
248 software (Guindon et al., 2010) used the maximum likelihood method (Guindon and  
249 Gascuel, 2003) to construct the species phylogenetic tree (ML TREE). 4DTv of genes  
250 in each single-copy gene family are often used to estimate the substitution rate and the

251 divergence time between species. This analysis needed to be added to the phylogenetic  
252 tree of the species with the calibration time first (Benton and Donoghue, 2007; Blanc  
253 and Wolfe, 2004). According to the supergene sequence integrated in the phylogenetic  
254 analysis, the MCMCtree software (**Supplementary URLs**) in the PAML software  
255 package (Yang, 2007) was used to estimate the divergence time using the BRMC  
256 method (International Brachypodium, 2010; Sanderson, 2003). The MCMCtree  
257 running parameters were as follows: burn-in=20,000; sample-frequency=2. *O. sativa*  
258 was designated as an outgroup of the phylogenetic tree. The calibration times of the  
259 divergence between *O. sativa* and *A. thaliana* (130.7-160.6 MYA), *A. thaliana* and *G.*  
260 *uralensis* (124.3-132.1 MYA), *G. uralensis* and *V. vinifera* (117.8-127.5 MYA), *V.*  
261 *vinifera* and *C. annuum* (109.6-116.3 MYA), *D. carota* and *P. notoginseng* (48.3-70.1  
262 MYA) were obtained from the TimeTree website (**Supplementary URLs**). The  
263 divergence time between *P. notoginseng* and *P. ginseng*, *C. annuum* and *D. carota* were  
264 estimated to be approximately 4.2 MYA and 91.6 MYA respectively (**Supplementary**  
265 **Figure 8A**).

266

### 267 **3.3 Expansion and contraction of gene family**

268 Based on the cluster analysis results of gene families and after filtering gene families  
269 with abnormal gene numbers in individual species, we used the CAFÉ program(De Bie  
270 et al., 2006) to identify the expansion and contraction of gene families of each species.  
271 A random birth and death model were used to study changes in gene families along  
272 each lineage of the phylogenetic tree. We used the probabilistic graphical model (PGM)  
273 to simulate the gain and loss of genes under the phylogenetic tree and conducted  
274 hypothesis testing to analyze the expansion and contraction of gene families. Using  
275 conditional likelihoods as the test statistics, we calculated the corresponding p-values  
276 in each lineage, and a p-value of 0.05 was used to identify families that were  
277 significantly expanded and contracted. Finally, we determined that 989 gene families  
278 were expanded and 1823 gene families were contracted (**Supplementary Figure 8B**).  
279 By conducting enrichment analysis of GO and KEGG on gene families, results showed  
280 that expanded gene families mainly enriched in GO terms such as transposition, fatty

281 acid biosynthetic process, respiratory chain, catalytic activity and so on  
282 **(Supplementary Table 15)**. Contracted gene families mainly enriched in GO terms  
283 **(Supplementary Table 16)** such as protein phosphorylation, protein modification  
284 process, beta-glucan biosynthetic process, 1,3-beta-D-glucan synthase complex, purine  
285 nucleotide binding and so on **(Supplementary Figure 9)**.  
286

## 287 **Supplementary Section S4 - Analysis of whole-genome duplication**

288

### 289 **4.1 Identification of WGD events of *P. notoginseng***

290 To further explore the evolution of the *P. notoginseng* genome, we searched for whole  
291 genome duplication (WGD) in our assembled *P. notoginseng* genome. WGD events are  
292 widespread in the plant genome and are considered to be an important driving force for  
293 the evolution of plant genomes. The protein sequences from *P. notoginseng*, *V. vinifera*  
294 and *D. carota* were searched against themselves using blastp ( $E < 1e^{-5}$ ) to identify  
295 syntenic blocks. Then the alignment results were subjected to McscanX (Huang et al.,  
296 2009; Schmutz et al., 2010) to determine syntenic blocks. In addition, the protein  
297 sequences from *P. notoginseng* were compared with *V. vinifera*, *D. carota* and *P.*  
298 *ginseng*. We calculated the 4DTv (fourfold degenerate synonymous sites of the third  
299 codons) for syntenic segments from the concatenated alignments constructed by  
300 fourfold degenerate sites of all gene pairs found in each segment and plotted the  
301 distribution of the 4DTv values (**Figure 2B**). There were two peaks at approximately  
302 0.16 and 0.50 found in the *P. notoginseng* genome, and the first peak at approximately  
303 0.50 revealed the core eudicot gamma triplication event. The second peak at  
304 approximately 0.16 indicated that *P. notoginseng* underwent another WGD event after  
305 diverging from *V. vinifera* and *D. carota*.

306 To verify the above conjecture, we conducted a collinear comparison analysis of the  
307 *P. notoginseng* and *V. vinifera* genome. Jcvi was used for identify syntenic blocks and  
308 plotted their relationship (**Figure 2C and Supplementary Figure 10**). From the results,  
309 we could find that there was a 1:2 collinear relationship between *P. notoginseng* and *V.*  
310 *vinifera* genome (**Supplementary Figure 10**).

311

### 312 **4.2 Estimate the timing of the WGD event in *P. notoginseng***

313 To estimate the timing of the WGD event in *P. notoginseng*, we calculated the  $K_s$   
314 (synonymous substitution rate) value of the gene pair within and between species using  
315 the default parameters of the software wgd (Zwaenepoel and Van de Peer, 2019), and  
316 then summed the results and the distribution of the  $K_s$  values was plotted

317 **(Supplementary Figure 12)**. The results of the *Ks* distribution were consistent with the  
318 4DTV values, and showed a main peak at approximately 0.38, which indicated that a  
319 recent WGD event occurred in the *P. notoginseng* genome. Then we calculated the time  
320 of WGD event of *P. notoginseng* according to the method reported in the literature (Qin  
321 et al., 2014), and summarized the WGD events of each published genome for  
322 centralized display (Iorizzo et al., 2016; Tu et al., 2020; Vanneste et al., 2014). The  
323 WGD event occurred approximately 29.6 MYA in *P. notoginseng* genome.  
324

325 **Supplementary Section S5 - Analysis of genes related to terpenes biosynthesis**  
326 **pathway**

327

328 **5.1 Identification and phylogenetic analysis of genes**

329 The biosynthesis pathways of terpenoids in plants have been comprehensively  
330 explained, and research on *Panax* L. plants has attracted extensive interest from  
331 researchers. To identify the terpenoid biosynthesis-related genes in the *P. notoginseng*  
332 genome, we used two methods to analyze the genes in 8 species. For genes with  
333 corresponding domains in Pfam database such as *CYP450*, *DXR*, *DXS*, *HDR*, *HDS*,  
334 *HMGR*, *HMGS*, *MCS*, *MCT*, *MDD*, *PMK*, *SE*, *SS*, *UGT*, we used HMMER (3.1b1) to  
335 annotation and searched for each species to obtain copies of genes in different species.  
336 For genes where the corresponding domain in the Pfam database was not found, such  
337 as *AACT*, *CMK*, *DS*, *FPS*, *GGPPS*, *GPS*, *IPI*, *MVK*, we first downloaded the  
338 homologous sequences of genes in different species from NCBI and then compared the  
339 sequences by blast (2.2.28) (setting parameter: e value:  $1e^{-5}$ , covered  $> 50\%$ , identity  $>$   
340  $50\%$ ; **Supplementary URLs**) to obtain gene copies (**Supplementary Table 17**). After  
341 obtaining the gene sequences, we constructed the phylogenetic tree with each gene  
342 using the protein sequences in 8 species using MEGA-X (**Supplementary Figure 13-**  
343 **14**), the genetic relationship among the three species *P. notoginseng*, *P. ginseng* and *D.*  
344 *carota* was relatively close.

345

346 **5.2 Analysis of the duplication of homologous gene pairs**

347 After counting the genes in the terpenoid biosynthetic pathway, we found that most  
348 of the genes had multiple copies, so we analyzed the replication time of these multicopy  
349 gene pairs. We used the default parameter of wgd software to calculate the Ka value  
350 and Ks value of gene pairs, and then converted the Ks value to years (**Supplementary**  
351 **Table 18**). Finally, the results were presented in the form of pictures using Adobe  
352 Illustrator (**Supplementary Figure 15**).

353

354 **Supplementary Section S6 - Transcriptomic analysis and transcription factor**  
355 **regulation**

356

357 **6.1 Sample collections and RNA isolation of tissue transcriptome**

358 One- to four-year-old *P. notoginseng* plants were collected from Wenshan County,  
359 Yunnan Province, China. After harvested, we subdivided the plant into different tissue  
360 parts, including root (xylem), stem, leaf, flower, rhizome, fibril, periderm, phloem and  
361 tubercle (**Supplementary Figure 16-17**). All collected samples were transported by dry  
362 ice, washed with ultrapure water three times, immediately frozen on liquid nitrogen and  
363 stored at -80 °C prior to RNA extraction. Total RNA for each tissue was extracted using  
364 Trizol method. Generally, three biological replicates from each tissue were collected.

365

366 **6.2 RNA sequencing and assembly**

367 The RNA purity was checked using the kaiaoK5500@Spectrophotometer (Kaiao,  
368 Beijing, China) and the RNA integrity and concentration was assessed using the RNA  
369 Nano 6000 Assay Kit of the Bioanalyzer 2100 system (Agilent Technologies, CA,  
370 USA). Then, the integrate RNA was used in cDNA library construction and Illumina  
371 sequencing. The cDNA library was constructed using the NEBNext Ultra RNA Library  
372 Prep Kit for Illumina (NEB), following the manufacturer's recommendations. After  
373 cluster generation, the libraries were sequenced on an Illumina novaseq S2 platform  
374 and 150 bp paired-end reads were generated.

375 In order to guarantee the data quality which was used to analysis, Raw data was filter  
376 (**Supplementary Table 19**) with following steps: trim primer sequence from the reads;  
377 remove the contaminated reads for adapters; remove the low quality reads; remove the  
378 reads whose N base more than 5% for total bases. Bowtie2 v2.2.3 was used for building  
379 the genome index, and Clean Data was then aligned to the reference genome using  
380 HISAT2 v2.1.0 (**Supplementary Figure 18-19**). The filtered sequences were mapped  
381 on the *P. notoginseng* genome and the mapping rate ranged from 90%-96%, indicating  
382 a high quality of our genome.

383



### 384 **6.3 Transcriptome analysis**

385 ASprofile software was used to analyze and count the alternative splicing events of  
386 each sample in this study and rMats to classify and count the alternative splicing events  
387 in different groups (**Supplementary Figure 20 and Supplementary Table 20**). We  
388 also used Cuffcompare to detect new transcription and discovered some new unknown  
389 genes and laid the foundation for a more comprehensive analysis of transcript  
390 information. SNP and InDel were detected by Samtools (**Supplementary Figure 21**  
391 **and Supplementary Table 21**).

392 Reads Count for each gene in each sample was counted by HTSeq v0.6.0, and FPKM  
393 (Fragments Per Kilobase Million Mapped Reads) was then calculated (**Supplementary**  
394 **Figure 22 and 23**). To explore the gene-level regulation of the formation of the root  
395 morphological characteristics, we conducted a comparative analysis between the  
396 different root groups to screen for differentially expressed genes (DEGs). DESeq2 was  
397 employed for differential gene expression analysis between two samples with  
398 biological replicates. Genes with  $q \leq 0.05$  and  $|\log_2\_ratio| \geq 1$  were identified as DEGs.  
399 The GO and KEGG enrichment of differentially expressed genes were performed and  
400 considered to be significantly enriched with  $q < 0.05$ . After screening the DEGs between  
401 the periderm group and tubercle group, and GO enrichment analysis results showed that  
402 DEGs, which were highly expressed in tubercle group, were mainly enriched in  
403 secondary root formation, terpene catabolic process, shoot axis formation, strigolactone  
404 biosynthetic process (**Supplementary Figure 24**), etc. By annotating these DEGs, we  
405 found a series of genes related to the biosynthesis of phytohormone (**Supplementary**  
406 **Table 22**), such as the carotenoid cleavage dioxygenase 7 (CCD7) and CCD8 genes  
407 involved in the biosynthesis of strigolactone, hydroxylase and dehydrogenase genes  
408 related to cytokinin, expansin related genes, etc.

409

### 410 **6.4 Analysis of saponin biosynthesis and regulation mechanism**

411 Through comparison with the PlnatTFDB database, we identified a total of 2150  
412 transcription factor genes from the *P. notoginseng* genome, which were classified into  
413 57 subfamilies. Among these subfamilies, bHLH transcription factor, ERF transcription

414 factor, NAC transcription factor, MYB transcription factor, C2H2 transcription factor,  
415 MYB-related transcription factor contained a large number of gene copies  
416 (**Supplementary Table 23**). To investigate the role of transcription factors in terpenoid  
417 biosynthesis pathway, we studied the correlation between transcription factors and key  
418 enzyme genes. We first used R to calculate the Pearson correlation coefficient between  
419 transcription factors and genes in batches (set a significant correlation parameter  
420  $p < 0.05$ ). Then, we selected the strong correlation gene pair whose correlation  
421 coefficient is greater than 0.7 and used Cytoscape software to draw the correlation map  
422 (**Figure 2D**). From the correlation map, several subfamilies had a strong correlation  
423 include bHLH transcription factor, ERF transcription factor, MYB transcription factor,  
424 WRKY transcription factor, indicating that these genes may participate in terpenoid  
425 biosynthesis process by regulating the expression of key enzyme genes. In addition, we  
426 also studied the temporal (**Figure 3**) and spatial (**Supplementary Figure 25**)  
427 expression profiles of saponin pathway genes during the growth and development of *P.*  
428 *notoginseng*, with a view to more fully revealing the production and development of  
429 saponins in *P. notoginseng* plants.

430

## 431 **Supplementary Section S7 - Analyzing key enzyme genes of ginsenosides pathway** 432 **and functional verification of UGT genes**

433

### 434 **7.1 Phylogenetic analysis of UGT and CYP450 genes**

435 By comparison with the Pfam database, we identified 336 CYP450 genes and 158  
436 UGT genes from the *P. notoginseng* genome. Then we downloaded the gene sequences  
437 of each subfamily from NCBI (**Supplementary Table 25-26**), used MEGA-X software  
438 to construct the phylogenetic tree, and modified the evolution trees on the online  
439 website iTOL (**Supplementary Figure 26 and Figure 3A**) (Letunic and Bork, 2019).

440

### 441 **7.2 Function verification of candidate UGT genes**

#### 442 **7.2.1 Gene cloning and expression vector construction**

443 After sampling, *P. notoginseng* plants were frozen immediately in liquid nitrogen and

444 ground into powder for isolation of total RNA using Trizol (Invitrogen, Carlsbad, CA,  
445 USA) as the manufacture's instruction and then converted into cDNA using  
446 PrimeScript® RT reagent Kit with gDNA eraser (Takara, Dalian, China). Among the  
447 gene sequences obtained through systematic evolution and homologous alignment, we  
448 designed primers and cloned 32 open reading frames of UGT genes (**Supplementary**  
449 **Figure 27 and Supplementary Table 27**), the cloned open reading frames (ORFs) of  
450 UGT genes were inserted into *pEASY*®-Blunt Cloning Vector (TransGen Biotech,  
451 Beijing, China) independently. After the cloned gene was sequenced successfully, we  
452 connected them to the expression vector HIS-MBP-PreSc-pET28a (Li et al., 2018b)  
453 using Seamless Cloning Kit (Beyotime, Shanghai, China) as the manufacture's  
454 instruction.

455

### 456 **7.2.2 Induced protein expression and functional verification**

457 After successful construction, the expression vector was transformed into *E. coli*  
458 BL21 (DE3) (TransGen Biotech, Beijing, Chain), and the recombinant *E. coli* BL21  
459 (DE3) strain was cultured in LB medium (with 50µg/mL kanamycin) at 37 °C at 200  
460 rpm until the OD<sub>600</sub> reached 0.6-0.8. Cool the bacterial solution on ice and add IPTG to  
461 a final concentration of 50 µM. After incubation at 16 °C at 120 rpm for 16h, the cells  
462 were harvested by centrifugation at 4 °C and suspended in 100 mM phosphate buffer  
463 (pH 8.0), 1mM PMSF. The resuspension solution was disrupted by ultrasonication and  
464 the mixture was centrifuged at 4 °C at 12000 g for 20 min, so that protein and cell debris  
465 were successfully separated. The supernatant was used for enzymatic assays. The  
466 pET28a-transformed *E. coli* BL21 (DE3) cells were treated in parallel as a control. Next,  
467 we checked whether the vectors expressed protein by SDS-PAGE protein  
468 electrophoresis, and used the crude enzyme to carry out the enzymatic reaction of  
469 glycosylation. Generally, the reaction was carried out in a 100 µL volume containing  
470 100 mM crude enzyme buffer (pH 8.0), 1mM UDP-glucose, 0.1 mM acceptor substrate  
471 for 2h in a 35 °C water bath and was terminated by adding 100 µL methanol. At first,  
472 we used PPD and PPT as substrates and then use monoglucosides such as Rh<sub>2</sub>, F<sub>1</sub> as  
473 substrates to verify whether UGT genes have catalytic functions. The mixed solution

474 was allowed to stand overnight at 4 °C. The extraction was passed through a 0.22 µM  
475 organic filter membrane, and the resulting solution was tested by UPLC/Q-TOF-MS  
476 (ultrahigh-performance liquid chromatography coupled with quadrupole time-of-flight  
477 mass spectrometry) (**Supplementary Figure 28-31**). The following Q-TOF-MS  
478 parameters were used: the experiment was performed in the ESI (-) ionization mode;  
479 scan range, 50-1500 Da; scan time, 0.2 s; cone voltage, 40 V; source temperature,  
480 100 °C; dissolved gas temperature, 450 °C; cone gas flow rate, 50 L/h; desolvation flow  
481 rate, 900 L/h; collision energy, 20-50V. The mass accuracy was corrected by a lock  
482 spray with leucine enkephalin (200 pg/µL, 10 µL/min) as the reference (m/z 556.2766  
483 ESI (+) and 554.2620 ESI (-)).

484 The UPLC separation was performed using an Agilent Technologies 1290 Infinity II  
485 system (Agilent Technologies, Santa Clara, CA, USA) with a Waters ACQUITY UPLC  
486 HSS T3 analytical column (2.1 mm x 100 mm, 1.8 µm) kept at 35 °C. The mobile phases  
487 were a mixture of 0.1% (v/v) acetic acid in water (A) and acetonitrile (B), and the flow  
488 rate was 0.3 mL/min. The gradient elution was programmed as follows: 0–2.0 min, 20–  
489 28% B; 2.0–3.0 min, 28–36% B; 3.0–10.0 min, 36–40% B; 10.0–15.0 min, 40–64% B;  
490 15.0–17.0 min, 64–90% B; 17.0–22.0 min, 90–20% B. The injection volume was 1 µL  
491 for each sample.

492

### 493 **7.3 Screen for candidate UGT genes involved in the saponin biosynthetic pathway**

#### 494 **7.3.1 WGCNA analysis of UGT genes**

495 We used the WGCNA software package in the R to perform the analysis on the genes  
496 annotated as glucosyltransferases or glycosyltransferases and saponins pathway genes  
497 in *P. notoginseng* genome (**Supplementary Figure 33**). First of all, we sorted and  
498 filtered the genes expression data, genes with a variance of 0 in the expression between  
499 different samples were filtered out. In addition, genes with a gene expression level of 0  
500 that exceeded 10% of the total number of samples were also filtered out. Based on the  
501 filtered data, the hierarchical clustering was used to draw the sample tree, and the  
502 relationship between different samples could be seen from the dendrogram. Then we  
503 used the pickSoftThreshold function to calculate the soft threshold ( $\beta$  value). From the

504 result graph, we can see that when  $\beta$  value was 10, the correlation threshold was the  
505 highest. Finally, we used the function `blockwiseModules` to construct the modules  
506 present in these UGT genes, and obtained a total of 7 different modules  
507 **(Supplementary Table 28)**. In addition, the genes in the saponin biosynthesis pathway  
508 were mainly concentrated in the four modules: green, turquoise, red and brown.

509

### 510 **7.3.2 Identification and expression profiling of genes related to terpenoids** 511 **biosynthesis**

512 Through the transcriptome data, we obtained the expression levels of the genes  
513 related to terpenoid biosynthesis in each group of samples, and used MEV software to  
514 draw the heat maps **(Supplementary Figure 34)**. According to their expression patterns  
515 in different samples, these genes could be divided into three categories: most genes  
516 were highly expressed in flowers; some genes were highly expressed in various parts of  
517 roots; only a small part of genes were highly expressed in leaves. On this basis, we also  
518 screened a series of candidate UGT genes by comparing the expression patterns of  
519 pathway genes and annotated UGT genes **(Supplementary Figure 35 and**  
520 **Supplementary Table 29)**.

521

522 **Supplementary URLs**

- 523 PacBio Sequel System: <https://www.pacb.com/products-and-services/pacbio->  
524 [systems/sequel/](https://www.pacb.com/products-and-services/pacbio-systems/sequel/)
- 525 Canu: <https://github.com/marbl/canu>
- 526 Blasr: [https://github.com/ PacificBiosciences/blasr](https://github.com/PacificBiosciences/blasr)
- 527 Smrt Link: <https://downloads.paccloud.com/public/software/installers/>  
528 [smrtlink\\_5.0.1.9585.zip](https://downloads.paccloud.com/public/software/installers/smrtlink_5.0.1.9585.zip)
- 529 Pilon: <https://github.com/broadinstitute/pilon>
- 530 LACHESIS: <http://shendurelab.github.io/LACHESIS/>
- 531 BUSCO: <http://busco.ezlab.org/>
- 532 RepeatModeler: <http://www.repeatmasker.org/RepeatModeler/>
- 533 RepeatScout: <http://www.repeatmasker.org/>
- 534 RepBase: <https://www.girinst.org/server/RepBase/index.php>
- 535 RepeatMasker: <http://www.repeatmasker.org/>
- 536 RepeatProteinMask: <http://www.repeatmasker.org/>
- 537 Blast: <http://blast.ncbi.nlm.nih.gov/Blast.cgi>
- 538 Genewise: <http://www.ebi.ac.uk/~birney/wise2>
- 539 Augustus: <http://augustus.gobics.de/>
- 540 SNAP: <https://github.com/KorfLab/SNAP>
- 541 GeneMark: <http://exon.gatech.edu/GeneMark/>
- 542 PASA: <http://pasa.sourceforge.net/>
- 543 EVIDENCEModeler: <http://evidencemodeler.github.io/>
- 544 Swissprot: [https://web.expasy.org/docs/swiss-prot\\_guideline.html](https://web.expasy.org/docs/swiss-prot_guideline.html)
- 545 NT: <https://www.ncbi.nlm.nih.gov/nucleotide/>
- 546 NR: <ftp://ftp.ncbi.nlm.nih.gov/blast/db/FASTA/nr.gz>
- 547 PFAM: <http://xfam.org/>
- 548 eggNOG: <http://eggnogdb.embl.de/>
- 549 GO: <http://geneontology.org/page/go-database>
- 550 KEGG: <http://www.kegg.jp/>
- 551 Rfam: <http://rfam.xfam.org/>

552 tRNAscan-SE: <http://lowelab.ucsc.edu/tRNAscan-SE/>  
553 Mummer 4.0: <https://github.com/mummer4/mummer>  
554 MUSCLE: <http://www.drive5.com/muscle/>  
555 ENSEMBL database: <http://www.ensembl.org/index.html>  
556 PlantTFDB: [planttfdb.cbi.pku.edu.cn/](http://planttfdb.cbi.pku.edu.cn/) iTOL: <https://itol.embl.de/itol.cgi>  
557 MCMCtree: <http://abacus.gene.ucl.ac.uk/software/paml.html>  
558 TimeTree: <http://www.time.org/>  
559

**References**

- 561 Aoki, K., Yano, K., Suzuki, A., Kawamura, S., Sakurai, N., Suda, K., Kurabayashi, A.,  
562 Suzuki, T., Tsugane, T., Watanabe, M., et al. (2010). Large-scale analysis of full-  
563 length cDNAs from the tomato (*Solanum lycopersicum*) cultivar Micro-Tom, a  
564 reference system for the Solanaceae genomics. BMC GENOMICS 11:210.
- 565 Augustin, M.M., Ruzicka, D.R., Shukla, A.K., Augustin, J.M., Starks, C.M., O'Neil-  
566 Johnson, M., McKain, M.R., Evans, B.S., Barrett, M.D., Smithson, A., et al.  
567 (2015). Elucidating steroid alkaloid biosynthesis in *Veratrum californicum*:  
568 production of verazine in Sf9 cells. Plant J 82:991-1003.
- 569 Bak, S., Kahn, R., Nielsen, H., Moller, B., and Halkier, B. (1998). Cloning of three A-  
570 type cytochromes p450, CYP71E1, CYP98, and CYP99 from *Sorghum bicolor*  
571 (L.) Moench by a PCR approach and identification by expression in *Escherichia*  
572 *coli* of CYP71E1 as a multifunctional cytochrome p450 in the biosynthesis of  
573 the cyanogenic glucoside dhurrin. Plant Mol Biol 36:393-405.
- 574 Benton, M.J., and Donoghue, P.C. (2007). Paleontological evidence to date the tree of  
575 life. Mol Biol Evol 24:26-53.
- 576 BJ, W., T, A., T, S., M, P., A, A., S, S., A., C.C., Zeng, Q., Wortman, J., Young, S.K., et  
577 al. (2014). Pilon: An Integrated Tool for Comprehensive Microbial Variant  
578 Detection and Genome Assembly Improvement. PLoS ONE 9:e112963.
- 579 Blanc, G., and Wolfe, K.H. (2004). Widespread paleopolyploidy in model plant species  
580 inferred from age distributions of duplicate genes. Plant Cell 16:1667-1678.
- 581 Brazier-Hicks, M., and Edwards, R. (2005). Functional importance of the family 1  
582 glucosyltransferase UGT72B1 in the metabolism of xenobiotics in *Arabidopsis*  
583 *thaliana*. Plant J 42:556-566.
- 584 Chakraborty, M., Baldwin-Brown, J.G., Long, A.D., and Emerson, J.J. (2016).  
585 Contiguous and accurate *de novo* assembly of metazoan genomes with modest  
586 long read coverage. Nucleic Acids Res 44:e147.
- 587 Chen, B., Chen, J., Du, Q., Zhou, D., Wang, L., Xie, J., Li, Y., and Zhang, D. (2018).  
588 Genetic variants in microRNA biogenesis genes as novel indicators for  
589 secondary growth in *Populus*. New Phytol 219:1263-1282.
- 590 Chen, H., Wu, B., Nelson, D.R., Wu, K., and Liu, C. (2014). Computational  
591 Identification and Systematic Classification of Novel Cytochrome P450 Genes  
592 in *Salvia miltiorrhiza*. PLOS ONE 9:e115149.
- 593 Chen, H.Y., and Li, X. (2017). Identification of a residue responsible for UDP-sugar  
594 donor selectivity of a dihydroxybenzoic acid glucosyltransferase from  
595 *Arabidopsis* natural accessions. Plant J 89:195-203.
- 596 Courtney, K.J., Percival, F.W., Hallaban, D.L., Christoffersen, R.E., and Hallahan, D.L.  
597 (1996). The Electronic Plant Gene Register. Plant Physiol 112:445-446.
- 598 De Bie, T., Cristianini, N., Demuth, J.P., and Hahn, M.W. (2006). CAFE: a  
599 computational tool for the study of gene family evolution. Bioinformatics  
600 22:1269-1271.
- 601 Edgar, R.C. (2004). MUSCLE: multiple sequence alignment with high accuracy and  
602 high throughput. Nucleic Acids Res 32:1792-1797.
- 603 Eljounaidi, K., Cankar, K., Comino, C., Moglia, A., Hehn, A., Bourgaud, F.,



604 Bouwmeester, H., Menin, B., Lanteri, S., and Beekwilder, J. (2014).  
605 Cytochrome P450s from *Cynara cardunculus* L. CYP71AV9 and CYP71BL5,  
606 catalyze distinct hydroxylations in the sesquiterpene lactone biosynthetic  
607 pathway. *Plant Science* 223:59-68.

608 English, A.C., Richards, S., Han, Y., Wang, M., Vee, V., Qu, J., Qin, X., Muzny, D.M.,  
609 Reid, J.G., Worley, K.C., et al. (2012). Mind the gap: upgrading genomes with  
610 Pacific Biosciences RS long-read sequencing technology. *PLoS One* 7:e47768.

611 Feng, Q., Zhang, Y., Hao, P., Wang, S., Fu, G., Huang, Y., Li, Y., Zhu, J., Liu, Y., Hu,  
612 X., et al. (2002). Sequence and analysis of rice chromosome 4. *Nature* 420:316-  
613 320.

614 Fukushima, E.O., Seki, H., Ohyama, K., Ono, E., Umemoto, N., Mizutani, M., Saito,  
615 K., and Muranaka, T. (2011). CYP716A Subfamily Members are  
616 Multifunctional Oxidases in Triterpenoid Biosynthesis. *Plant Cell Physiol*  
617 52:2050-2061.

618 Guindon, S., Dufayard, J.F., Lefort, V., Anisimova, M., Hordijk, W., and Gascuel, O.  
619 (2010). New algorithms and methods to estimate maximum-likelihood  
620 phylogenies: assessing the performance of PhyML 3.0. *Syst Biol* 59:307-321.

621 Guindon, S., and Gascuel, O. (2003). A simple, fast, and accurate algorithm to estimate  
622 large phylogenies by maximum likelihood. *Syst Biol* 52:696-704.

623 Guo, J., Ma, X., Cai, Y., Ma, Y., Zhan, Z., Zhou, Y.J., Liu, W., Guan, M., Yang, J., Cui,  
624 G., et al. (2016a). Cytochrome P450 promiscuity leads to a bifurcating  
625 biosynthetic pathway for tanshinones. *New Phytol* 210:525-534.

626 Guo, J., Zhou, Y.J., Hillwig, M.L., Shen, Y., Yang, L., Wang, Y., Zhang, X., Liu, W.,  
627 Peters, R.J., Chen, X., et al. (2013). CYP76AH1 catalyzes turnover of  
628 miltiradiene in tanshinones biosynthesis and enables heterologous production  
629 of ferruginol in yeasts. *Proc Natl Acad Sci U S A* 110:12108-12113.

630 Guo, L., Yang, R., and Gu, Z. (2016b). Cloning of genes related to aliphatic  
631 glucosinolate metabolism and the mechanism of sulforaphane accumulation in  
632 broccoli sprouts under jasmonic acid treatment. *J Sci Food Agr* 96:4329-4336.

633 Hackl, T., Hedrich, R., Schultz, J., and Forster, F. (2014). proovread: large-scale high-  
634 accuracy PacBio correction through iterative short read consensus.  
635 *Bioinformatics* 30:3004-3011.

636 Han, J.Y., Hwang, H.S., Choi, S.W., Kim, H.J., and Choi, Y.E. (2012). Cytochrome  
637 P450 CYP716A53v2 catalyzes the formation of protopanaxatriol from  
638 protopanaxadiol during ginsenoside biosynthesis in *Panax ginseng*. *Plant Cell*  
639 *Physiol* 53:1535-1545.

640 Han, J.Y., Kim, H.J., Kwon, Y.S., and Choi, Y.E. (2011). The Cyt P450 enzyme  
641 CYP716A47 catalyzes the formation of protopanaxadiol from dammarenediol-  
642 II during ginsenoside biosynthesis in *Panax ginseng*. *Plant Cell Physiol*  
643 52:2062-2073.

644 Hansen, E., Osmani, S., Kristensen, C., Moller, B., and Hansen, J. (2009). Substrate  
645 specificities of family 1 UGTs gained by domain swapping. *Phytochemistry*  
646 70:473-482.

647 Hou, B., Lim, E., Higgins, G., and Bowles, D.J. (2004). N-glucosylation of cytokinins

648 by glycosyltransferases of *Arabidopsis thaliana*. *J Biol Chem* 279:47822-47832.

649 Hu, T.T., Pattyn, P., Bakker, E.G., Cao, J., Cheng, J.F., Clark, R.M., Fahlgren, N.,  
650 Fawcett, J.A., Grimwood, J., Gundlach, H., et al. (2011). The *Arabidopsis lyrata*  
651 genome sequence and the basis of rapid genome size change. *Nat Genet* 43:476-  
652 481.

653 Huang, L., Li, J., Ye, H., Li, C., Wang, H., Liu, B., and Zhang, Y. (2012). Molecular  
654 characterization of the pentacyclic triterpenoid biosynthetic pathway in  
655 *Catharanthus roseus*. *Planta* 236:1571-1581.

656 Huang, S., Li, R., Zhang, Z., Li, L., Gu, X., Fan, W., Lucas, W.J., Wang, X., Xie, B.,  
657 Ni, P., et al. (2009). The genome of the cucumber, *Cucumis sativus* L. *Nature*  
658 *Genetics* 41:1275-1281.

659 International Brachypodium, I. (2010). Genome sequencing and analysis of the model  
660 grass *Brachypodium distachyon*. *Nature* 463:763-768.

661 International Rice Genome Sequencing, P. (2005). The map-based sequence of the rice  
662 genome. *Nature* 436:793-800.

663 Iorizzo, M., Ellison, S., Senalik, D., Zeng, P., Satapoomin, P., Huang, J., Bowman, M.,  
664 Iovene, M., Sanseverino, W., Cavagnaro, P., et al. (2016). A high-quality carrot  
665 genome assembly provides new insights into carotenoid accumulation and  
666 asterid genome evolution. *Nat Genet* 48:657-666.

667 Jia, H.M., Jia, H.J., Cai, Q.L., Wang, Y., Zhao, H.B., Yang, W.F., Wang, G.Y., Li, Y.H.,  
668 Zhan, D.L., Shen, Y.T., et al. (2019). The red bayberry genome and genetic basis  
669 of sex determination. *Plant Biotechnol J* 17:397-409.

670 Jones, P., Messner, B., Nakajima, J.-I., Schäffner, A.R., and Saito, K. (2003). UGT73C6  
671 and UGT78D1, Glycosyltransferases Involved in Flavonol Glycoside  
672 Biosynthesis in *Arabidopsis thaliana*. *J Biol Chem* 278:43910-43918.

673 Jung, S.-C., Kim, W., Park, S.C., Jeong, J., Park, M.K., Lim, S., Lee, Y., Im, W.-T., Lee,  
674 J.H., Choi, G., et al. (2014). Two Ginseng UDP-Glycosyltransferases  
675 Synthesize Ginsenoside Rg3 and Rd. *Plant Cell Physiol* 55:2177-2188.

676 Kahn, R., Bak, S., Svendsen, I., Halkier, B., and Moller, B. (1997). Isolation and  
677 reconstitution of cytochrome P450ox and in vitro reconstitution of the entire  
678 biosynthetic pathway of the cyanogenic glucoside dhurrin from sorghum. *Plant*  
679 *Physiol* 115:1661-1670.

680 Kim, B.-G., Sung, S.H., and Ahn, J.-H. (2012). Biological synthesis of quercetin 3-O-  
681 N-acetylglucosamine conjugate using engineered *Escherichia coli* expressing  
682 UGT78D2. *Appl Microbiol Biot* 93:2447-2453.

683 Knoch, E., Sugawara, S., Mori, T., Nakabayashi, R., Saito, K., and Yonekura-  
684 Sakakibara, K. (2017). UGT79B31 is responsible for the final modification step  
685 of pollen-specific flavonoid biosynthesis in *Petunia hybrida*. *Planta* 247:779-  
686 790.

687 Koren, S., Walenz, B.P., Berlin, K., Miller, J.R., Bergman, N.H., and Phillippy, A.M.  
688 (2017). Canu: scalable and accurate long-read assembly via adaptive k-mer  
689 weighting and repeat separation. *Genome Res* 27:722-736.

690 Kovinich, N., Saleem, A., Arnason, J.T., and Miki, B. (2010). Functional  
691 characterization of a UDP-glucose:flavonoid 3-O-glucosyltransferase from the

692 seed coat of black soybean (*Glycine max* (L.) Merr.). *Phytochemistry* 71:1253-  
693 1263.

694 KRAUS, P., and KUTCHAN, T. (1995). Molecular-cloning and heterologous  
695 expression of a cDNA encoding berbamunine synthase, a c-o phenol-coupling  
696 cytochrome-p450 from the higher-plant berberis-stolonifera. *P Natl Acad Sci*  
697 *USA* 92:2071-2075.

698 Krokida, A., Delis, C., Geisler, K., Garagounis, C., Tsikou, D., Peña-Rodríguez, L.M.,  
699 Katsarou, D., Field, B., Osbourn, A.E., and Papadopoulou, K.K. (2013). A  
700 metabolic gene cluster in *Lotus japonicus* discloses novel enzyme functions and  
701 products in triterpene biosynthesis. *New Phytol* 200:675-690.

702 Lanot, A., Hodge, D., Jackson, R.G., George, G.L., Elias, L., Lim, E.K., Vaistij, F.E.,  
703 and Bowles, D.J. (2006). The glucosyltransferase UGT72E2 is responsible for  
704 monolignol 4-O-glucoside production in *Arabidopsis thaliana*. *Plant J* 48:286-  
705 295.

706 Lanot, A., Hodge, D., Lim, E.K., Vaistij, F.E., and Bowles, D.J. (2008). Redirection of  
707 flux through the phenylpropanoid pathway by increased glucosylation of  
708 soluble intermediates. *Planta* 228:609-616.

709 Letunic, I., and Bork, P. (2019). Interactive Tree Of Life (iTOL) v4: recent updates and  
710 new developments. *Nucleic Acids Res* 47:W256-W259.

711 Li, L., Cheng, H., Gai, J., and Yu, D. (2007). Genome-wide identification and  
712 characterization of putative cytochrome P450 genes in the model legume  
713 *Medicago truncatula*. *Planta* 226:109-123.

714 Li, L., Stoeckert, C.J., Jr., and Roos, D.S. (2003). OrthoMCL: identification of ortholog  
715 groups for eukaryotic genomes. *Genome Res* 13:2178-2189.

716 Li, Q., Yu, H.M., Meng, X.F., Lin, J.S., Li, Y.J., and Hou, B.K. (2018a). Ectopic  
717 expression of glycosyltransferase UGT76E11 increases flavonoid accumulation  
718 and enhances abiotic stress tolerance in *Arabidopsis*. *Plant Biol (Stuttg)* 20:10-  
719 19.

720 Li, Q.S., Lin, X.M., Qiao, R.Y., Zheng, X.Q., Lu, J.L., Ye, J.H., and Liang, Y.R. (2017).  
721 Effect of fluoride treatment on gene expression in tea plant (*Camellia sinensis*).  
722 *Sci Rep* 7:9847.

723 Li, X.J., Chen, X.J., Guo, X., Yin, L.L., Ahammed, G.J., Xu, C.J., Chen, K.S., Liu, C.C.,  
724 Xia, X.J., Shi, K., et al. (2016). DWARF overexpression induces alteration in  
725 phytohormone homeostasis, development, architecture and carotenoid  
726 accumulation in tomato. *Plant Biotechnol J* 14:1021-1033.

727 Li, Y., Lin, H.X., Wang, J., Yang, J., Lai, C.J., Wang, X., Ma, B.W., Tang, J.F., Li, Y.,  
728 Li, X.L., et al. (2018b). Glucosyltransferase Capable of Catalyzing the Last Step  
729 in Neoandrographolide Biosynthesis. *Org Lett* 20:5999-6002.

730 Lim, C.E., Ahn, J.-H., and Lim, J. (2006). Molecular genetic analysis of tandemly  
731 located glucosyltransferase genes, UGT73B1, UGT73B2, and UGT73B3, in  
732 *Arabidopsis thaliana*. *J Plant Biol* 49:309-314.

733 Lim, E., Higgins, G., Li, Y., and Bowles, D.J. (2003). Regioselectivity of glucosylation  
734 of caffeic acid by a UDP-glucose : glucosyltransferase is maintained in planta.  
735 *Biochem J* 373:987-992.

736 Lim, E.K., Jackson, R.G., and Bowles, D.J. (2005). Identification and characterisation  
737 of *Arabidopsis* glycosyltransferases capable of glucosylating coniferyl aldehyde  
738 and sinapyl aldehyde. *FEBS Lett* 579:2802-2806.

739 Lin, J.S., Huang, X.X., Li, Q., Cao, Y., Bao, Y., Meng, X.F., Li, Y.J., Fu, C., and Hou,  
740 B.K. (2016). UDP-glycosyltransferase 72B1 catalyzes the glucose conjugation  
741 of monolignols and is essential for the normal cell wall lignification in  
742 *Arabidopsis thaliana*. *Plant J* 88:26-42.

743 Lin, X., Kaul, S., Rounsley, S., Shea, T., Benito, M., Town, C., Fujii, C., Mason, T.,  
744 Bowman, C., Barnstead, M., et al. (1999). Sequence and analysis of  
745 chromosome 2 of the plant *Arabidopsis thaliana*. *Nature* 402:761-+.

746 Liu, X., Liu, Y., Huang, P., Ma, Y., Qing, Z., Tang, Q., Cao, H., Cheng, P., Zheng, Y.,  
747 Yuan, Z., et al. (2017). The Genome of Medicinal Plant *Macleaya cordata*  
748 Provides New Insights into Benzylisoquinoline Alkaloids Metabolism.  
749 *Molecular Plant* 10:975-989.

750 Mao, H., Liu, J., Ren, F., Peters, R.J., and Wang, Q. (2016). Characterization of  
751 CYP71Z18 indicates a role in maize zealexin biosynthesis. *Phytochemistry*  
752 121:4-10.

753 Mayer, K., and Schuller, C., and Wambutt, R., and Murphy, G., and Volckaert, G., and  
754 Pohl, T., and Dusterhoft, A., and Stiekema, W., and Entian, K., and Terryn, N.,  
755 et al. (1999). Sequence and analysis of chromosome 4 of the plant *Arabidopsis*  
756 *thaliana*. *Nature* 402:769-+.

757 Mazel, A., and Levine, A. (2002). Induction of glucosyltransferase transcription and  
758 activity during superoxide-dependent cell death in *Arabidopsis* plants. *Plant*  
759 *Physiol Bioch* 40:133-140.

760 Miettinen, K., Dong, L., Navrot, N., Schneider, T., Burlat, V., Pollier, J., Woittiez, L.,  
761 van der Krol, S., Lugan, R., Ilc, T., et al. (2014). The seco-iridoid pathway from  
762 *Catharanthus roseus*. *Nat Commun* 5:3606.

763 Morant, M., Schoch, G.A., Ullmann, P., Ertunc, T., Little, D., Olsen, C.E., Petersen, M.,  
764 Negrel, J., and Werck-Reichhart, D. (2007). Catalytic activity, duplication and  
765 evolution of the CYP98 cytochrome P450 family in wheat. *Plant Mol Biol* 63:1-  
766 19.

767 Moses, T., Pollier, J., Almagro, L., Buyst, D., Van Montagu, M., Pedreno, M.A., Martins,  
768 J.C., Thevelein, J.M., and Goossens, A. (2014). Combinatorial biosynthesis of  
769 saponins and saponins in *Saccharomyces cerevisiae* using a C-16 alpha  
770 hydroxylase from *Bupleurum falcatum*. *Proc Natl Acad Sci U S A* 111:1634-  
771 1639.

772 Motamayor, J.C., Mockaitis, K., Schmutz, J., Haiminen, N., Livingstone, D., III,  
773 Cornejo, O., Findley, S.D., Zheng, P., Utro, F., Royaert, S., et al. (2013). The  
774 genome sequence of the most widely cultivated cacao type and its use to identify  
775 candidate genes regulating pod color. *GENOME BIOLOGY* 14:r53.

776 Nomura, T., Kushiro, T., Yokota, T., Kamiya, Y., Bishop, G., and Yamaguchi, S. (2005).  
777 The last reaction producing brassinolide is catalyzed by cytochrome P-450s,  
778 CYP85A3 in tomato and CYP85A2 in *Arabidopsis*. *J Biol Chem* 280:17873-  
779 17879.

780 Ohnishi, T., Nomura, T., Watanabe, B., Ohta, D., Yokota, T., Miyagawa, H., Sakata, K.,  
781 and Mizutani, M. (2006). Tomato cytochrome P450CYP734A7 functions in  
782 brassinosteroid catabolism. *Phytochemistry* 67:1895-1906.

783 Ono, E., Ruike, M., Iwashina, T., Nomoto, K., and Fukui, Y. (2010). Co-pigmentation  
784 and flavonoid glycosyltransferases in blue *Veronica persica* flowers.  
785 *Phytochemistry* 71:726-735.

786 Oudin, A., Hamdi, S.d., Ouélhazi, L., Chénieux, J.-C., Rideau, M., and Clastre, M.  
787 (1999). Induction of a novel cytochrome P450 (CYP96 family) in periwinkle  
788 (*Catharanthus roseus*) cells induced for terpenoid indole alkaloid production.  
789 *Plant Science* 149:105-113.

790 Overkamp, S., Hein, F., and Barz, W. (2000). Cloning and characterization of eight  
791 cytochrome P450 cDNAs from chickpea (*Cicer arietinum* L.) cell suspension  
792 cultures. *Plant Science* 155:101-108.

793 Pham, T., Chen, H., Dai, L., and Vu, T.Q.T. (2016). Isolation a P450 gene in *Pinus*  
794 *armandi* and its expression after inoculation of *Leptographium qinlingensis* and  
795 treatment with methyl jasmonate. *Russ J Plant Physiol+* 63:111-118.

796 Priest, D.M., Ambrose, S.J., Vaistij, F.E., Elias, L., Higgins, G.S., Ross, A.R., Abrams,  
797 S.R., and Bowles, D.J. (2006). Use of the glucosyltransferase UGT71B6 to  
798 disturb abscisic acid homeostasis in *Arabidopsis thaliana*. *Plant J* 46:492-502.

799 Qi, X., Bakht, S., Qin, B., Leggett, M., Hemmings, A., Mellon, F., Eagles, J., Werck-  
800 Reichhart, D., Schaller, H., Lesot, A., et al. (2006). A different function for a  
801 member of an ancient and highly conserved cytochrome P450 family: From  
802 essential sterols to plant defense. *P Natl Acad Sci USA* 103:18848-18853.

803 Qin, C., Yu, C., Shen, Y., Fang, X., Chen, L., Min, J., Cheng, J., Zhao, S., Xu, M., Luo,  
804 Y., et al. (2014). Whole-genome sequencing of cultivated and wild peppers  
805 provides insights into *Capsicum* domestication and specialization. *Proc Natl*  
806 *Acad Sci U S A* 111:5135-5140.

807 Ro, D., Arimura, G., Lau, S., Piers, E., and Bohlmann, J. (2005). Loblolly pine  
808 abietadienol/abietadienal oxidase PtAO (CYP720B1) is a multifunctional,  
809 multisubstrate cytochrome P450 monooxygenase. *P Natl Acad Sci USA*  
810 102:8060-8065.

811 Roach, M.J., Johnson, D.L., Bohlmann, J., van Vuuren, H.J.J., Jones, S.J.M., Pretorius,  
812 I.S., Schmidt, S.A., and Borneman, A.R. (2018). Population sequencing reveals  
813 clonal diversity and ancestral inbreeding in the grapevine cultivar Chardonnay.  
814 *PLoS Genet* 14:e1007807.

815 Rojas Rodas, F., Rodriguez, T.O., Murai, Y., Iwashina, T., Sugawara, S., Suzuki, M.,  
816 Nakabayashi, R., Yonekura-Sakakibara, K., Saito, K., Kitajima, J., et al. (2014).  
817 Linkage mapping, molecular cloning and functional analysis of soybean gene  
818 Fg2 encoding flavonol 3-O-glucoside (1 --> 6) rhamnosyltransferase. *Plant Mol*  
819 *Biol* 84:287-300.

820 Saito, S., Hirai, N., Matsumoto, C., Ohigashi, H., Ohta, D., Sakata, K., and Mizutani,  
821 M. (2004). *Arabidopsis* CYP707As encode (+)-abscisic acid 8'-hydroxylase, a  
822 key enzyme in the oxidative catabolism of abscisic acid. *Plant Physiol*  
823 134:1439-1449.

824 Salanoubat, M., and Lemcke, K., and Rieger, M., and Ansorge, W., and Unseld, M., and  
825 Fartmann, B., and Valle, G., and Blocker, H., and Perez-Alonso, M., and  
826 Obermaier, B., et al. (2000). Sequence and analysis of chromosome 3 of the  
827 plant *Arabidopsis thaliana*. *Nature* 408:820-822.

828 Salim, V., Wiens, B., Masada-Atsumi, S., Yu, F., and De Luca, V. (2014). 7-  
829 Deoxyloganetic acid synthase catalyzes a key 3 step oxidation to form 7-  
830 deoxyloganetic acid in *Catharanthus roseus* iridoid biosynthesis.  
831 *Phytochemistry* 101:23-31.

832 Sanderson, M. (2003). r8s: inferring absolute rates of molecular evolution and  
833 divergence times in the absence of a molecular clock. *Bioinformatics* 19:301-  
834 302.

835 Schmutz, J., Cannon, S.B., Schlueter, J., Ma, J., Mitros, T., Nelson, W., Hyten, D.L.,  
836 Song, Q., Thelen, J.J., Cheng, J., et al. (2010). Genome sequence of the  
837 palaeopolyploid soybean. *Nature* 463:178-183.

838 Schopfer, C., and Ebel, J. (1998). Identification of elicitor-induced cytochrome P450s  
839 of soybean (*Glycine max* L.) using differential display of mRNA. *Molecular and*  
840 *general genetics* 258:315-322.

841 Seki, H., Ohyama, K., Sawai, S., Mizutani, M., Ohnishi, T., Sudo, H., Akashi, T., Aoki,  
842 T., Saito, K., and Muranaka, T. (2008). Licorice beta-amyrin 11-oxidase, a  
843 cytochrome P450 with a key role in the biosynthesis of the triterpene sweetener  
844 glycyrrhizin. *P Natl Acad Sci USA* 105:14204-14209.

845 Seki, H., Sawai, S., Ohyama, K., Mizutani, M., Ohnishi, T., Sudo, H., Fukushima, E.O.,  
846 Akashi, T., Aoki, T., Saito, K., et al. (2011). Triterpene functional genomics in  
847 licorice for identification of CYP72A154 involved in the biosynthesis of  
848 glycyrrhizin. *Plant Cell* 23:4112-4123.

849 Shaokang Di, F.Y., Felipe Rojas Rodas, Tito O Rodriguez, Yoshinori Murai, Tsukasa  
850 Iwashina, Satoko Sugawara, Tetsuya Mori, Ryo Nakabayashi, Keiko Yonekura-  
851 Sakakibara, Kazuki Saito, Ryoji Takahashi. (2015). Linkage mapping,  
852 molecular cloning and functional analysis of soybean gene Fg3 encoding  
853 flavonol 3-O-glucoside/galactoside (1 → 2) glucosyltransferase. *BMC Plant*  
854 *Biol* 15:126.

855 Shi, P., Fu, X., Shen, Q., Liu, M., Pan, Q., Tang, Y., Jiang, W., Lv, Z., Yan, T., Ma, Y.,  
856 et al. (2018). The roles of AaMIXTA1 in regulating the initiation of glandular  
857 trichomes and cuticle biosynthesis in *Artemisia annua*. *New Phytol* 217:261-  
858 276.

859 Shibuya, M., Nishimura, K., Yasuyama, N., and Ebizuka, Y. (2010). Identification and  
860 characterization of glycosyltransferases involved in the biosynthesis of  
861 soyasaponin I in *Glycine max*. *FEBS Lett* 584:2258-2264.

862 Simao, F.A., Waterhouse, R.M., Ioannidis, P., Kriventseva, E.V., and Zdobnov, E.M.  
863 (2015). BUSCO: assessing genome assembly and annotation completeness with  
864 single-copy orthologs. *Bioinformatics* 31:3210-3212.

865 Steele, C., Gijzen, M., Qutob, D., and Dixon, R. (1999). Molecular characterization of  
866 the enzyme catalyzing the aryl migration reaction of isoflavonoid biosynthesis  
867 in soybean. *Arch Biochem Biophys* 367:146-150.

868 Stigliani, A.L., Giorio, G., and D'Ambrosio, C. (2011). Characterization of P450  
869 Carotenoid  $\beta$ - and  $\epsilon$ -Hydroxylases of Tomato and Transcriptional Regulation of  
870 Xanthophyll Biosynthesis in Root, Leaf, Petal and Fruit. *Plant Cell Physiol*  
871 52:851-865.

872 Sun, Y., Chen, Z., Li, J., Li, J., Lv, H., Yang, J., Li, W., Xie, D., Xiong, Z., Zhang, P., et  
873 al. (2018). Diterpenoid UDP-Glycosyltransferases from Chinese Sweet Tea and  
874 Ashitaba Complete the Biosynthesis of Rubusoside. *Mol Plant* 11:1308-1311.

875 Sun, Y., Ji, K., Liang, B., Du, Y., Jiang, L., Wang, J., Kai, W., Zhang, Y., Zhai, X., Chen,  
876 P., et al. (2017). Suppressing ABA uridine diphosphate glucosyltransferase  
877 (SIUGT75C1) alters fruit ripening and the stress response in tomato. *Plant J*  
878 91:574-589.

879 Tabata, S., and Kaneko, T., and Nakamura, Y., and Kotani, H., and Kato, T., and  
880 Asamizu, E., and Miyajima, N., and Sasamoto, S., and Kimura, T., and  
881 Hosouchi, T., et al. (2000). Sequence and analysis of chromosome 5 of the plant  
882 *Arabidopsis thaliana*. *Nature* 408:823-826.

883 Tamura, K., Seki, H., Suzuki, H., Kojoma, M., Saito, K., and Muranaka, T. (2016).  
884 CYP716A179 functions as a triterpene C-28 oxidase in tissue-cultured stolons  
885 of *Glycyrrhiza uralensis*. *Plant Cell Rep* 36:437-445.

886 Tamura, K., Teranishi, Y., Ueda, S., Suzuki, H., Kawano, N., Yoshimatsu, K., Saito, K.,  
887 Kawahara, N., Muranaka, T., and Seki, H. (2017). Cytochrome P450  
888 Monooxygenase CYP716A141 is a Unique beta-Amyrin C-16beta Oxidase  
889 Involved in Triterpenoid Saponin Biosynthesis in *Platycodon grandiflorus*.  
890 *Plant Cell Physiol* 58:874-884.

891 Tanaka, K., Hayashi, K.-i., Natsume, M., Kamiya, Y., Sakakibara, H., Kawaide, H., and  
892 Kasahara, H. (2014). UGT74D1 Catalyzes the Glucosylation of 2-Oxindole-3-  
893 Acetic Acid in the Auxin Metabolic Pathway in *Arabidopsis*. *Plant Cell Physiol*  
894 55:218-228.

895 Theologis, A., Ecker, J., Palm, C., Federspiel, N., Kaul, S., White, O., Alonso, J., Altafi,  
896 H., Araujo, R., Bowman, C., et al. (2000). Sequence and analysis of  
897 chromosome 1 of the plant *Arabidopsis thaliana*. *Nature* 408:816-820.

898 Triikka, F.A., Nikolaidis, A., Ignea, C., Tsaballa, A., Tziveleka, L.-A., Ioannou, E.,  
899 Roussis, V., Stea, E.A., Božić, D., Argiriou, A., et al. (2015). Combined  
900 metabolome and transcriptome profiling provides new insights into diterpene  
901 biosynthesis in *S. pomifera* glandular trichomes. *BMC Genomics* 16.

902 Tu, L., Su, P., Zhang, Z., Gao, L., Wang, J., Hu, T., Zhou, J., Zhang, Y., Zhao, Y., Liu,  
903 Y., et al. (2020). Genome of *Tripterygium wilfordii* and identification of  
904 cytochrome P450 involved in triptolide biosynthesis. *Nat Commun* 11:971.

905 Vanneste, K., Baele, G., Maere, S., and Van de Peer, Y. (2014). Analysis of 41 plant  
906 genomes supports a wave of successful genome duplications in association with  
907 the Cretaceous-Paleogene boundary. *Genome Res* 24:1334-1347.

908 Vasav, A.P., and Barvkar, V.T. (2019). Phylogenomic analysis of cytochrome P450  
909 multigene family and their differential expression analysis in *Solanum*  
910 *lycopersicum* L. suggested tissue specific promoters. *BMC Genomics* 20:116.

911 Wang, P., Wei, Y., Fan, Y., Liu, Q., Wei, W., Yang, C., Zhang, L., Zhao, G., Yue, J., Yan,

912 X., et al. (2015). Production of bioactive ginsenosides Rh2 and Rg3 by  
913 metabolically engineered yeasts. *Metab Eng* 29:97-105.

914 Wang, S., Wang, R., Liu, T., Lv, C., Liang, J., Kang, C., Zhou, L., Guo, J., Cui, G.,  
915 Zhang, Y., et al. (2019). CYP76B74 Catalyzes the 3"-Hydroxylation of  
916 Geranylhydroquinone in Shikonin Biosynthesis. *Plant Physiol* 179:402-414.

917 Wei, W., Wang, P., Wei, Y., Liu, Q., Yang, C., Zhao, G., Yue, J., Yan, X., and Zhou, Z.  
918 (2015). Characterization of *Panax ginseng* UDP-Glycosyltransferases  
919 Catalyzing Protopanaxatriol and Biosyntheses of Bioactive Ginsenosides F1  
920 and Rh1 in Metabolically Engineered Yeasts. *Mol Plant* 8:1412-1424.

921 Weng, J.-K., Li, Y., Mo, H., and Chapple, C. (2012). Assembly of an Evolutionarily  
922 New Pathway for alpha-Pyrone Biosynthesis in Arabidopsis. *Science* 337:960-  
923 964.

924 Wilson, A.E., Wu, S., and Tian, L. (2019). PgUGT95B2 preferentially metabolizes  
925 flavones/flavonols and has evolved independently from flavone/flavonol UGTs  
926 identified in *Arabidopsis thaliana*. *Phytochemistry* 157:184-193.

927 Witte, S., Moco, S., Vervoort, J., Matern, U., and Martens, S. (2009). Recombinant  
928 expression and functional characterisation of regiospecific flavonoid  
929 glucosyltransferases from *Hieracium pilosella* L. *Planta* 229:1135-1146.

930 Wolfgang Schweiger, J.B., Sanghyun Shin, Brigitte Poppenberger, Franz Berthiller,  
931 Marc Lemmens, Gary J Muehlbauer, Gerhard Adam. (2012). Validation of a  
932 Candidate Deoxynivalenol-Inactivating UDP-glucosyltransferase From Barley  
933 by Heterologous Expression in Yeast. *Mol Plant Microbe In* 23:977-986.

934 Xie, F., Xiao, P., Chen, D., Xu, L., and Zhang, B. (2012). miRDeepFinder: a miRNA  
935 analysis tool for deep sequencing of plant small RNAs. *Plant Mol Biol* 80:75-  
936 84.

937 Yan, X., Fan, Y., Wei, W., Wang, P., Liu, Q., Wei, Y., Zhang, L., Zhao, G., Yue, J., and  
938 Zhou, Z. (2014). Production of bioactive ginsenoside compound K in  
939 metabolically engineered yeast. *Cell Res* 24:770-773.

940 Yang, Z. (2007). PAML 4: phylogenetic analysis by maximum likelihood. *Mol Biol*  
941 *Evol* 24:1586-1591.

942 Yonekura-Sakakibara, K., Tohge, T., Matsuda, F., Nakabayashi, R., Takayama, H.,  
943 Niida, R., Watanabe-Takahashi, A., Inoue, E., and Saito, K. (2008).  
944 Comprehensive flavonol profiling and transcriptome coexpression analysis  
945 leading to decoding gene-metabolite correlations in Arabidopsis. *Plant Cell*  
946 20:2160-2176.

947 Yonekura-Sakakibara, K., Tohge, T., Niida, R., and Saito, K. (2007). Identification of a  
948 flavonol 7-O-rhamnosyltransferase gene determining flavonoid pattern in  
949 Arabidopsis by transcriptome coexpression analysis and reverse genetics. *J Biol*  
950 *Chem* 282:14932-14941.

951 Yu, H.S., Ma, L.Q., Zhang, J.X., Shi, G.L., Hu, Y.H., and Wang, Y.N. (2011).  
952 Characterization of glycosyltransferases responsible for salidroside  
953 biosynthesis in *Rhodiola sachalinensis*. *Phytochemistry* 72:862-870.

954 Zhang, Y., Xie, K., Liu, A., Chen, R., Chen, D., Yang, L., and Dai, J. (2019). Enzymatic  
955 biosynthesis of benzyloquinoline alkaloid glycosides via promiscuous



956 glycosyltransferases from *Carthamus tinctorius*. Chinese Chemical Letters  
957 30:443-446.

958 Zwaenepoel, A., and Van de Peer, Y. (2019). wgd-simple command line tools for the  
959 analysis of ancient whole-genome duplications. Bioinformatics 35:2153-2155.

960

961 \_\_\_\_\_

962 **Supplementary Figure Legends**

963 **Supplementary Figure 1. *K-mer* analysis for estimating the genome size of *P.***  
964 ***notoginseng*.** (A) The distribution of numbers of *K-mer* individuals. The red dashed  
965 line marks the main peak with depth = 63. (B) The distribution of numbers of *K-mer*  
966 species.

967 **Supplementary Figure 2. Genome-wide Hi-C map of *P. notoginseng*.** Interaction  
968 frequency distribution of Hi-C links among chromosomes shows in color key of  
969 heatmap ranging from light yellow to dark brown indicated the frequency of Hi-C  
970 interaction links from low to high (0–5).

971 **Supplementary Figure 3. Analysis of repetitive sequences in the *P. notoginseng***  
972 **genome.** (A) LTR retrotransposons prediction using different methods; (B) Summary  
973 of repetitive sequences in the *P. notoginseng* genome; (C) Analysis of the divergence  
974 of various types of repetitive sequences.

975 **Supplementary Figure 4. Characteristic distribution of *P. notoginseng* annotated**  
976 **genes and comparison with related species.** Plant genomes for comparison include *A.*  
977 *thaliana*, *D. carota*, *P. ginseng* and *P. notoginseng*-published.

978 **Supplementary Figure 5. Cluster analysis of gene families of eight species.**

979 **Supplementary Figure 6. Venn diagram of distribution of gene families among the**  
980 **seven species.** The histogram on the left represents the number of gene families of each  
981 species. The red dots and lines on the right represent the gene family's classification  
982 between the designated species, and the number of each group is shown by the bar graph  
983 above.

984 **Supplementary Figure 7. Enrichment analysis of GO and KEGG in *P.***  
985 ***notoginseng*-specific gene families.** GO enrichment analysis includes three parts:  
986 biological process (A), cellular component (B) and molecular function (C). (D) KEGG  
987 enrichment analysis of *P. notoginseng*-specific genes. The larger the bubble radius, the  
988 higher the rich-ratio value and the redder the color of bubble, the higher the degree of  
989 enrichment.

990 **Supplementary Figure 8. Evolution analysis of *P. notoginseng* genome.** (A)  
991 Estimated time of divergence between the eight species in the evolutionary process. (B)

992 Analysis of gene family expansion and contraction between the eight plant genomes.  
993 **Supplementary Figure 9. GO enrichment analysis of expanded and contracted**  
994 **gene families of *P. notoginseng* genome. (A)** GO enrichment analysis of expanded  
995 gene families; **(B)** GO enrichment analysis of contracted gene families; **(C)** Summary  
996 of gene numbers expanding and contracting in different categories of GO enrichment  
997 analysis.

998 **Supplementary Figure 10. Summary of the syntenic analysis between *P.***  
999 ***notoginseng* and *V. vinifera* (n=1 biologically independent samples).**

1000 **Supplementary Figure 11. Collinear analysis among *D. carota*, *P. notoginseng* and**  
1001 ***V. vinifera* genome.** The red lines in the genomes of *P. notoginseng* and *V. vinifera*  
1002 indicate that the 1:2 correspondence between the two collinear regions.

1003 **Supplementary Figure 12. Synonymous substitution rate (*Ks*) distributions of**  
1004 **syntenic blocks in *P. notoginseng* and comparison with *P. ginseng* and *V. vinifera***  
1005 **genome.**

1006 **Supplementary Figure 13. Phylogenetic tree of key enzyme genes in terpenoid**  
1007 **biosynthetic pathway in 8 species including *P. notoginseng*, *P. ginseng*, *D. carota*, *V.***  
1008 ***vinifera*, *O. sativa*, *A. thaliana*, *G. uralensis* and *C. annuum* (1).** Each phylogenetic  
1009 tree of terpenoid biosynthetic genes was constructed by using MEGA X with the  
1010 neighbor-joining method.

1011 **Supplementary Figure 14. Phylogenetic trees of key enzyme genes involved in**  
1012 **terpenoid biosynthetic pathway in 8 species including *P. notoginseng*, *P. ginseng*,**  
1013 ***D. carota*, *V. vinifera*, *O. sativa*, *A. thaliana*, *G. uralensis* and *C. annuum* (2).** Each  
1014 phylogenetic tree of terpenoid biosynthetic genes was constructed by using MEGA X  
1015 with the neighbor-joining method.

1016 **Supplementary Figure 15. Evolution of ginsenoside-associated genes in *P.***  
1017 ***notoginseng*. (A)** Genome duplication in *P. notoginseng*. The calculated *Ks* value was  
1018 converted to the divergence time according to  $T=Ks/2r$ , where *r* represents a substitution  
1019 rate of  $6.5 \times 10^{-9}$  mutations per site per year for eudicots (n=1 biologically independent  
1020 samples). **(B)** Duplication event(s) for each gene pair is(are) shown along the timeline  
1021 from 0 to 150 million years ago with different colors.

1022 **Supplementary Figure 16. Overview of clustering of transcriptome samples.**

1023 **Supplementary Figure 17. Pearson correlation analysis of transcriptome samples.**

1024 The  $R^2$  value between two random transcripts were indicated in the box, and ranging

1025 from white to blue indicted from low to high (0-1).

1026 **Supplementary Figure 18. The proportion distribution of various reads before**

1027 **filtering in all samples.**

1028 **Supplementary Figure 19. The coverage distribution of gene regions mapping on**

1029 **genome in each transcript.**

1030 **Supplementary Figure 20. Statistics of alternative splicing events. (A)** events in

1031 each sample; **(B)** different types of alternative splicing events in the comparison groups.

1032 TSS: Transcription Start Site; TTS: Transcription Terminal Site; SKIP: Skipped exon;

1033 XSKIP: Approximate SKIP; MSKIP: Multi-exon SKIP; XMSKIP: Approximate

1034 MSKIP; IR: Intron retention; XIR: Approximate IR; MIR: Multi-IR; XMIR:

1035 Approximate MIR; AE: Alternative exon ends (5', 3' or both); XAE: Approximate AE

1036 (5' or 3'); A3SS: Alternative 3' splice site; A5SS: Alternative 5' splice site.

1037 **Supplementary Figure 21. Variation analysis of each sample. (A)** distribution of

1038 each variant type; **(B)** according to the detected SNP loci, the frequency of each

1039 mutation type has been counted, taking the data results of One1Leaf, Two1Leaf,

1040 Two2Flower, Tri3Stem, Tri1Xylem, Fou2Perid as examples; **(C)** according to the

1041 detected InDel loci, the frequency of each InDel length has been counted, taking the

1042 data results of One1Leaf, Two1Leaf, Two2Flower, Tri3Stem, Tri1Xylem, Fou2Perid as

1043 examples.

1044 **Supplementary Figure 22. Density distribution diagram of gene expression in each**

1045 **transcriptome sample.**

1046 **Supplementary Figure 23. Box plot of the overall distribution of gene expression**

1047 **in each transcriptome sample.**

1048 **Supplementary Figure 24. The exploration of the molecular mechanism of the**

1049 **formation of *P. notoginseng*'s tubercles. (A)** the display of root morphology of *P.*

1050 *notoginseng*, and the red arrow points to the tubercles. **(B)** GO enrichment analysis of

1051 DEGs between the periderm and tubercle group. **(C)** the Directed Acyclic Graph (DAG)

1052 of GO enrichment analysis, the darker color indicates the more significant enrichment  
1053 and the red is the most significant. The larger the bubble radius, the higher the rich-ratio  
1054 value and the redder the color of bubble, the higher the degree of enrichment.

1055 **Supplementary Figure 25. Spatial expression profile of key enzyme genes in**  
1056 **saponin biosynthesis pathway.** The genes in red font are the functional UGT cloned  
1057 in this study.

1058 **Supplementary Figure 26. Phylogenetic analysis of CYP450 genes in *P.***  
1059 ***notoginseng* using MEGA-X.**

1060 **Supplementary Figure 27. Heat map of the expression of the cloned UGT genes in**  
1061 **different transcript samples.** The genes marked by five-pointed stars are those with  
1062 catalytic function identified in this study. In the heat map, the relative expression level  
1063 from high to low (-2 to 2) is represented by the range from blue to red.

1064 **Supplementary Figure 28 The blank control experiments of protein catalytic**  
1065 **reaction in this study. (A)** Analysis results of *E. coli* no-load control with PPD as the  
1066 catalytic substrate. **(B)** Analysis results of *E. coli* no-load control with PPT as the  
1067 catalytic substrate. **(C)** Analysis results of *E. coli* no-load control with ginsenoside F1  
1068 as the catalytic substrate. **(D)** Analysis results of *E. coli* no-load control with Rh2 as the  
1069 catalytic substrate. The molecular ion peaks with 667.4465, 683.4406, 845.496 and  
1070 784.00 were extracted respectively, and the mass spectrum in the green box did not  
1071 match with any corresponding glycoside product, indicating no product was formed.

1072 **Supplementary Figure 29. UPLC/Q-TOF analysis results of PnUGT3 protein**  
1073 **catalytic reaction. (A)** Chromatograms and mass spectrum of ginsenoside Rh1  
1074 standard and PnUGT3 catalytic products using PPT as substrate. **(B)** Chromatograms  
1075 and mass spectrum of ginsenoside Rg1 standard and PnUGT3 catalytic products using  
1076 F1 as substrate.

1077 **Supplementary Figure 30. UPLC/Q-TOF analysis results of PnUGT1 and**  
1078 **PnUGT5 protein catalytic reaction. (A)** Chromatograms and mass spectrum of  
1079 ginsenoside F1 standard and PnUGT1 catalytic products using PPT as substrate. **(B)**  
1080 Chromatograms and mass spectrum of ginsenoside CK standard and PnUGT1 catalytic  
1081 products using PPD as substrate. **(C)** Chromatograms and mass spectrum of

1082 ginsenoside F2 standard and PnUGT1 catalytic products using Rh2 as substrate. **(D)**  
1083 Chromatograms and mass spectrum of ginsenoside Rh2 standard and PnUGT5 catalytic  
1084 products using PPD as substrate.

1085 **Supplementary Figure 31. UPLC/Q-TOF analysis results of PnUGT2 and**  
1086 **PnUGT4 protein catalytic reaction.** Chromatograms and mass spectrum of  
1087 ginsenoside Rg3 standard and PnUGT2 and PnUGT4 catalytic products using Rh2 as  
1088 substrate.

1089 **Supplementary Figure 32. The structural formulas of various saponins in *P.***  
1090 ***notoginseng*.**

1091 **Supplementary Figure 33. WGCAN analysis and characterization of**  
1092 **corresponding data. (A)** Construction of the sample clustering evolutionary tree of  
1093 transcriptome to screen out outliers. **(B)** Construction the PCA map of transcriptome  
1094 samples. **(C)** Analysis of network topology for various soft-thresholding powers. When  
1095 we set  $R^2=0.9$ , the optimal candidate threshold to reach this height is 10. **(D)**  
1096 Visualization of the eigengene network representing the relationships among the  
1097 modules. The redder the color in the heat map, the stronger the correlation between the  
1098 two modules.

1099 **Supplementary Figure 34. Expression profile of key enzyme genes in saponin**  
1100 **biosynthesis pathway.** The right side of the heatmap shows the evolutionary tree of  
1101 genes, and genes with similar expression patterns are clustered into one group.

1102 **Supplementary Figure 35. Heat map of expression of UGT genes and genes in**  
1103 **terpenoid biosynthesis pathway.** The right side of the heatmap shows the evolutionary  
1104 tree of genes, and genes with similar expression patterns are clustered into one group.

1105 **Supplementary Figure 36. Gene clusters involved in saponins biosynthesis found**  
1106 **in *P. notoginseng* genome. (A)** Gene clusters on chromosomes 1, 2 and their  
1107 correspondence. **(B)** Gene clusters on chromosomes 6, 8 and their correspondence.  
1108 Orange lines indicate copies of genes with the same function, and blue lines indicate  
1109 the correlation between transcription factors and pathway genes.

1110

1111 **Supplementary Table legends**

1112 **Supplementary Table 1.** Estimation of genome size of *P. notoginseng* based on *K-mer*  
1113 analysis.

1114 **Supplementary Table 2.** Sequencing data statistics of *P. notoginseng*.

1115 **Supplementary Table 3.** The Statistics of Pseudomolecule based on Hi-C technique.

1116 **Supplementary Table 4.** Statistic of DNA base composition in the *P. notoginseng*  
1117 genome.

1118 **Supplementary Table 5.** Statistics of consistency assessment of the *P. notoginseng*  
1119 genome.

1120 **Supplementary Table 6.** Assessment the gene coverage rate using BUSCO.

1121 **Supplementary Table 7.** Annotation of repetitive sequences in the *P. notoginseng*  
1122 genome.

1123 **Supplementary Table 8.** Summary of repetitive sequences in the *P. notoginseng*  
1124 genome.

1125 **Supplementary Table 9.** Basic statistical results of gene structure prediction of *P.*  
1126 *notoginseng* genome.

1127 **Supplementary Table 10.** Basic statistical results of gene structure prediction of *P.*  
1128 *notoginseng* and relative species.

1129 **Supplementary Table 11.** Statistical results of gene function annotation of *P.*  
1130 *notoginseng* genome.

1131 **Supplementary Table 12.** Statistical results of non-coding RNA of *P. notoginseng*  
1132 genome.

1133 **Supplementary Table 13.** The Statistics of gene clustering to gene families in various  
1134 species.

1135 **Supplementary Table 14.** Enriched GO terms of genes in *P. notoginseng*-specific  
1136 families.

1137 **Supplementary Table 15.** Enriched GO terms of genes in expanded gene families.

1138 **Supplementary Table 16.** Enriched GO terms of genes in contracted gene families.

1139 **Supplementary Table 17.** Copy number variation of genes involved in the ginsenoside  
1140 biosynthesis in the *P. notoginseng* and seven other plant species.

1141 **Supplementary Table 18.** *K<sub>s</sub>* values and duplication times of genes involved in  
1142 ginsenoside biosynthesis in *P. notoginseng*.

1143 **Supplementary Table 19.** Statistics of the information and grouping of transcriptome  
1144 samples.

1145 **Supplementary Table 20.** Statistics of alternative splicing events occurred in *P.*  
1146 *notoginseng* genome.

1147 **Supplementary Table 21.** Statistics of variation events occurred in *P. notoginseng*  
1148 genome.

1149 **Supplementary Table 22.** Representative genes which are highly expressed in tubercle  
1150 group.

1151 **Supplementary Table 23.** Statistics of transcription factors in *P. notoginseng* genome.

1152 **Supplementary Table 24.** Statistics of FPKM expression in different tissues of some  
1153 key enzyme genes in the terpene biosynthesis pathway.

1154 **Supplementary Table 25.** The CYP450 genes used to construct phylogenetic tree in  
1155 this research.

1156 **Supplementary Table 26.** The UGT genes used to construct phylogenetic tree in this  
1157 research.

1158 **Supplementary Table 27.** Primers for cloning UGT genes in *P. notoginseng* genome.

1159 **Supplementary Table 28.** Annotation and GO enrichment of candidate UGT genes  
1160 selected by WGCNA analysis.

1161 **Supplementary Table 29.** Annotation and GO enrichment of candidate UGT genes  
1162 screened from the gene expression patterns.

1163 **(Note:** Among these tables, Supplementary Table 19, 20, 21, 24, 28, 29 are placed in a  
1164 separate excel sheet due to the large content.)

1165

1166



## Supplementary Figures

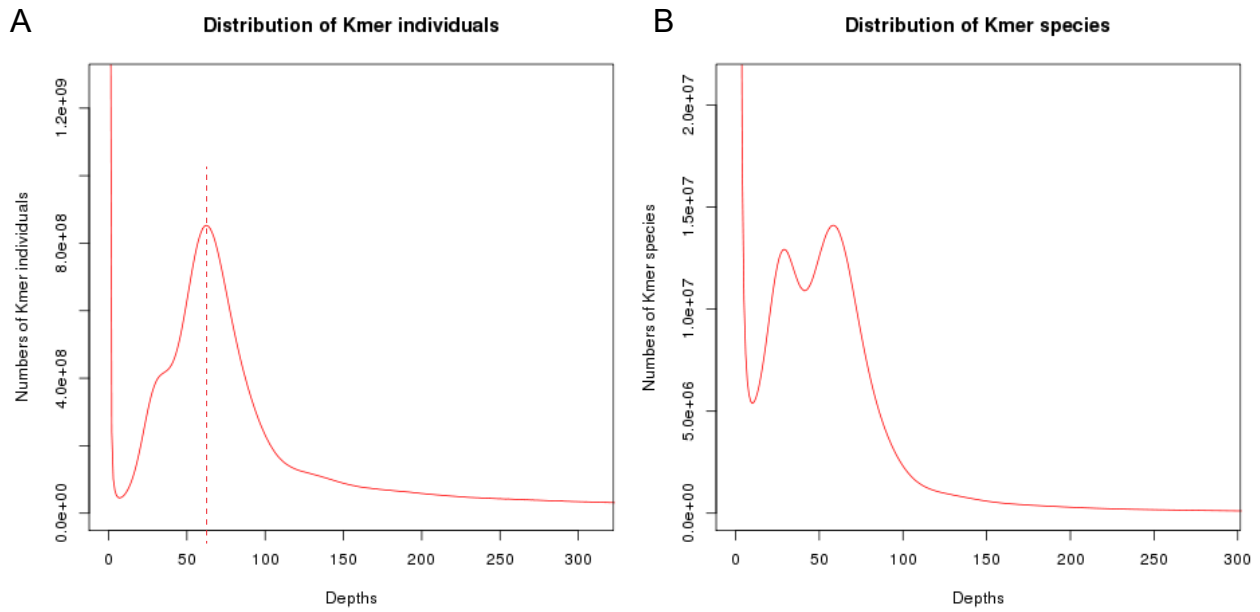

**Supplementary Figure 1. *K-mer* analysis for estimating the genome size of *P. notoginseng*.** (A) The distribution of numbers of *K-mer* individuals. The red dashed line marks the main peak with depth = 63. (B) The distribution of numbers of *K-mer* species.

PN201908S1 resolution=500000  
Genome-wide all-by-all Hi-C interaction

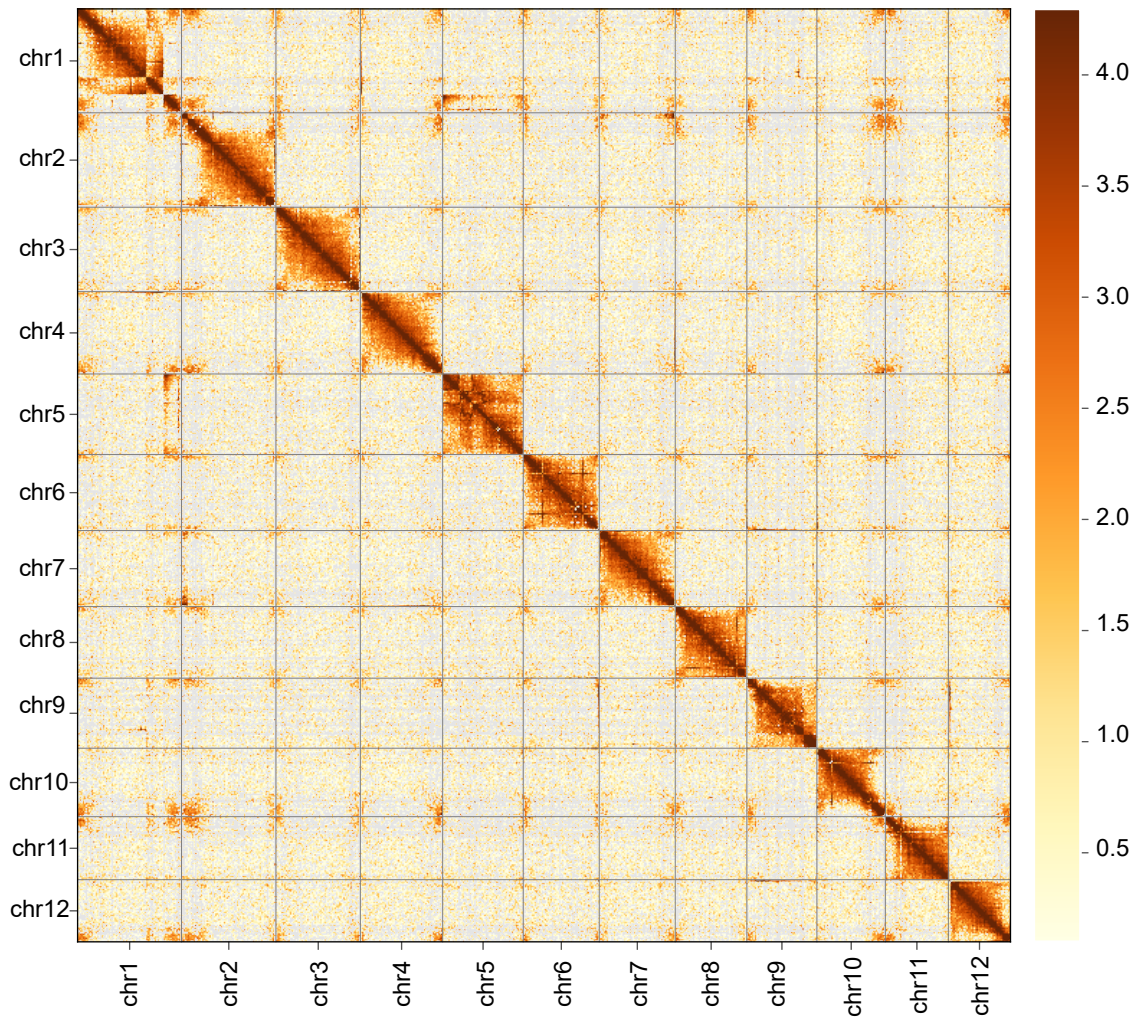

**Supplemental Figure 2. Genome-wide Hi-C map of *P. notoginseng*.** Interaction frequency distribution of Hi-C links among chromosomes shows in color key of heatmap ranging from light yellow to dark brown indicated the frequency of Hi-C interaction links from low to high (0-5).

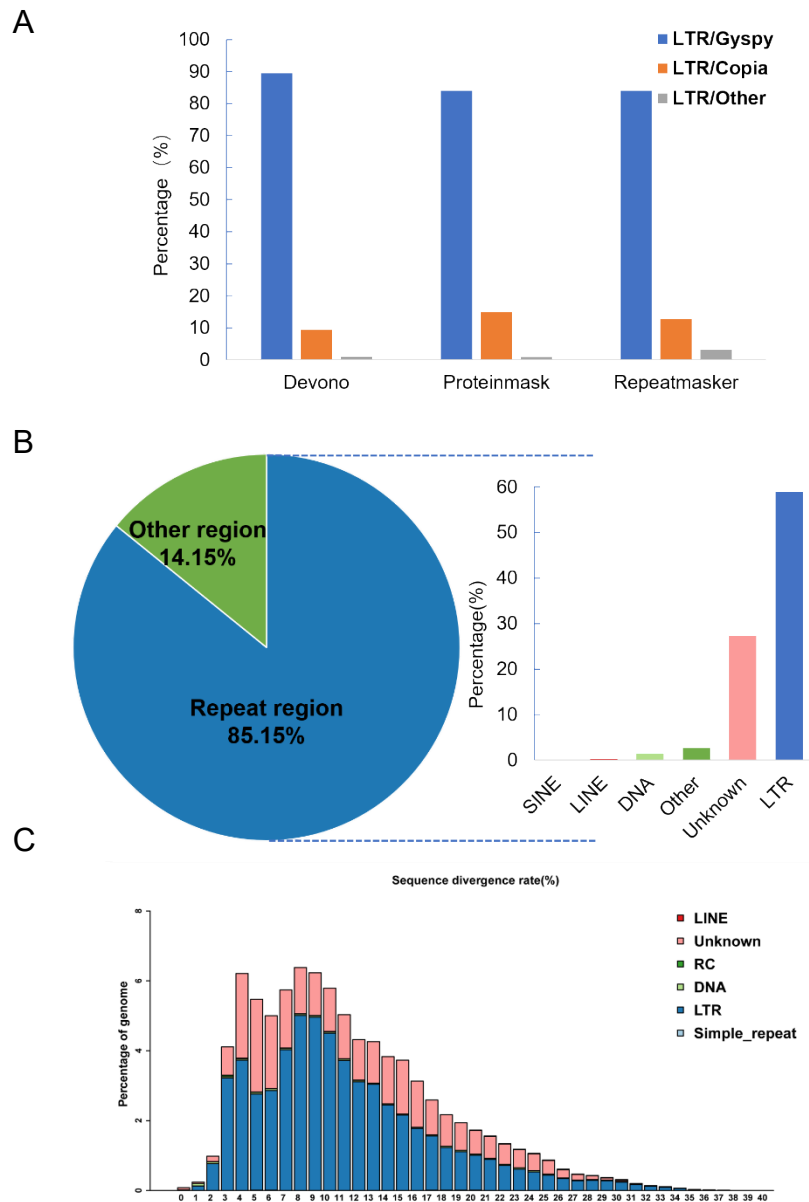

**Supplementary Figure 3. Analysis of repetitive sequences in the *P. notoginseng* genome.** (A) LTR retrotransposons prediction using different methods. (B) Summary of repetitive sequences in the *P. notoginseng* genome. (C) Analysis of the divergence of various types of repetitive sequences.

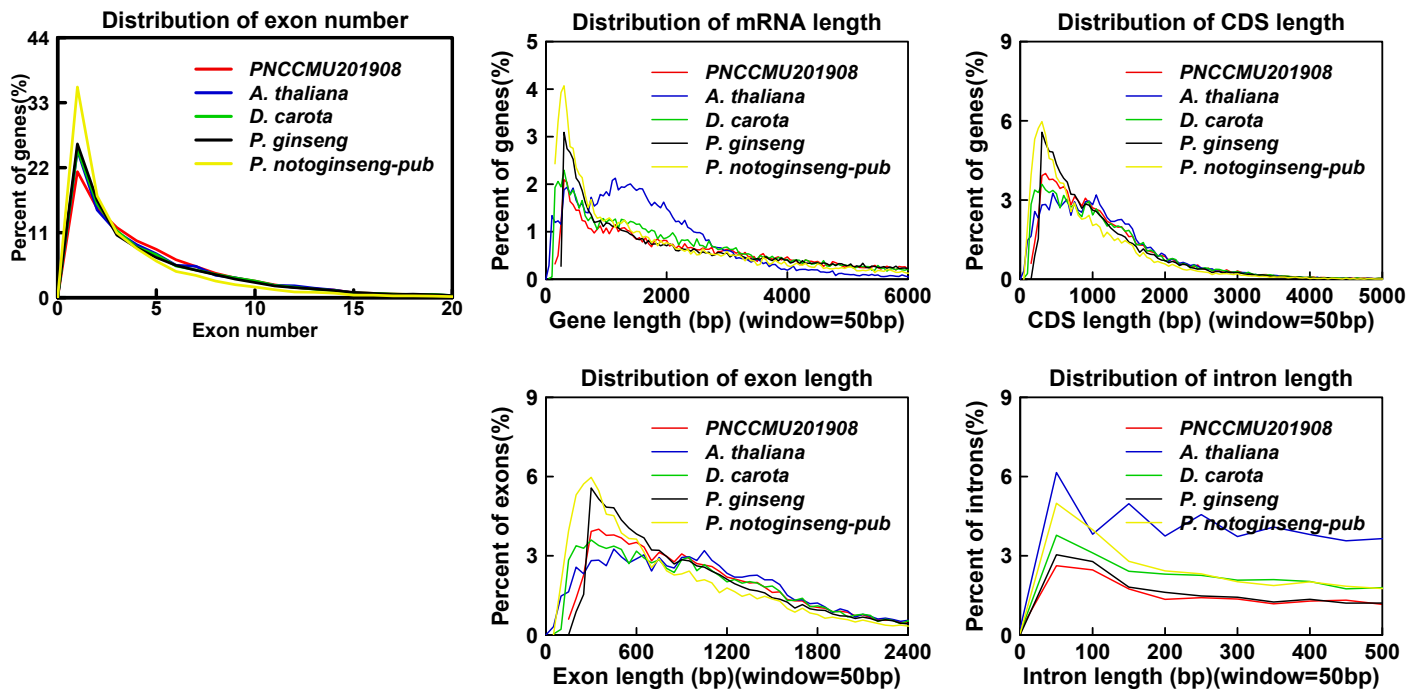

**Supplementary Figure 4. Characteristic distribution of *P. notoginseng* annotated genes and comparison with related species.** Plant genomes for comparison include *A. thaliana*, *D. carota*, *P. ginseng* and *P. notoginseng*-published.

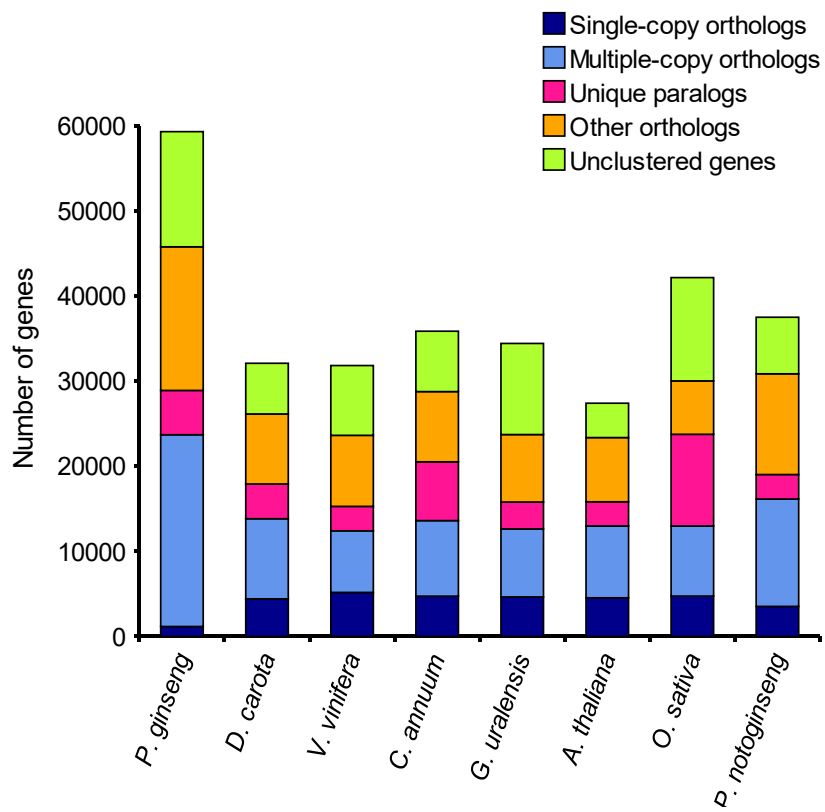

**Supplementary Figure 5. Cluster analysis of gene families of eight species.**

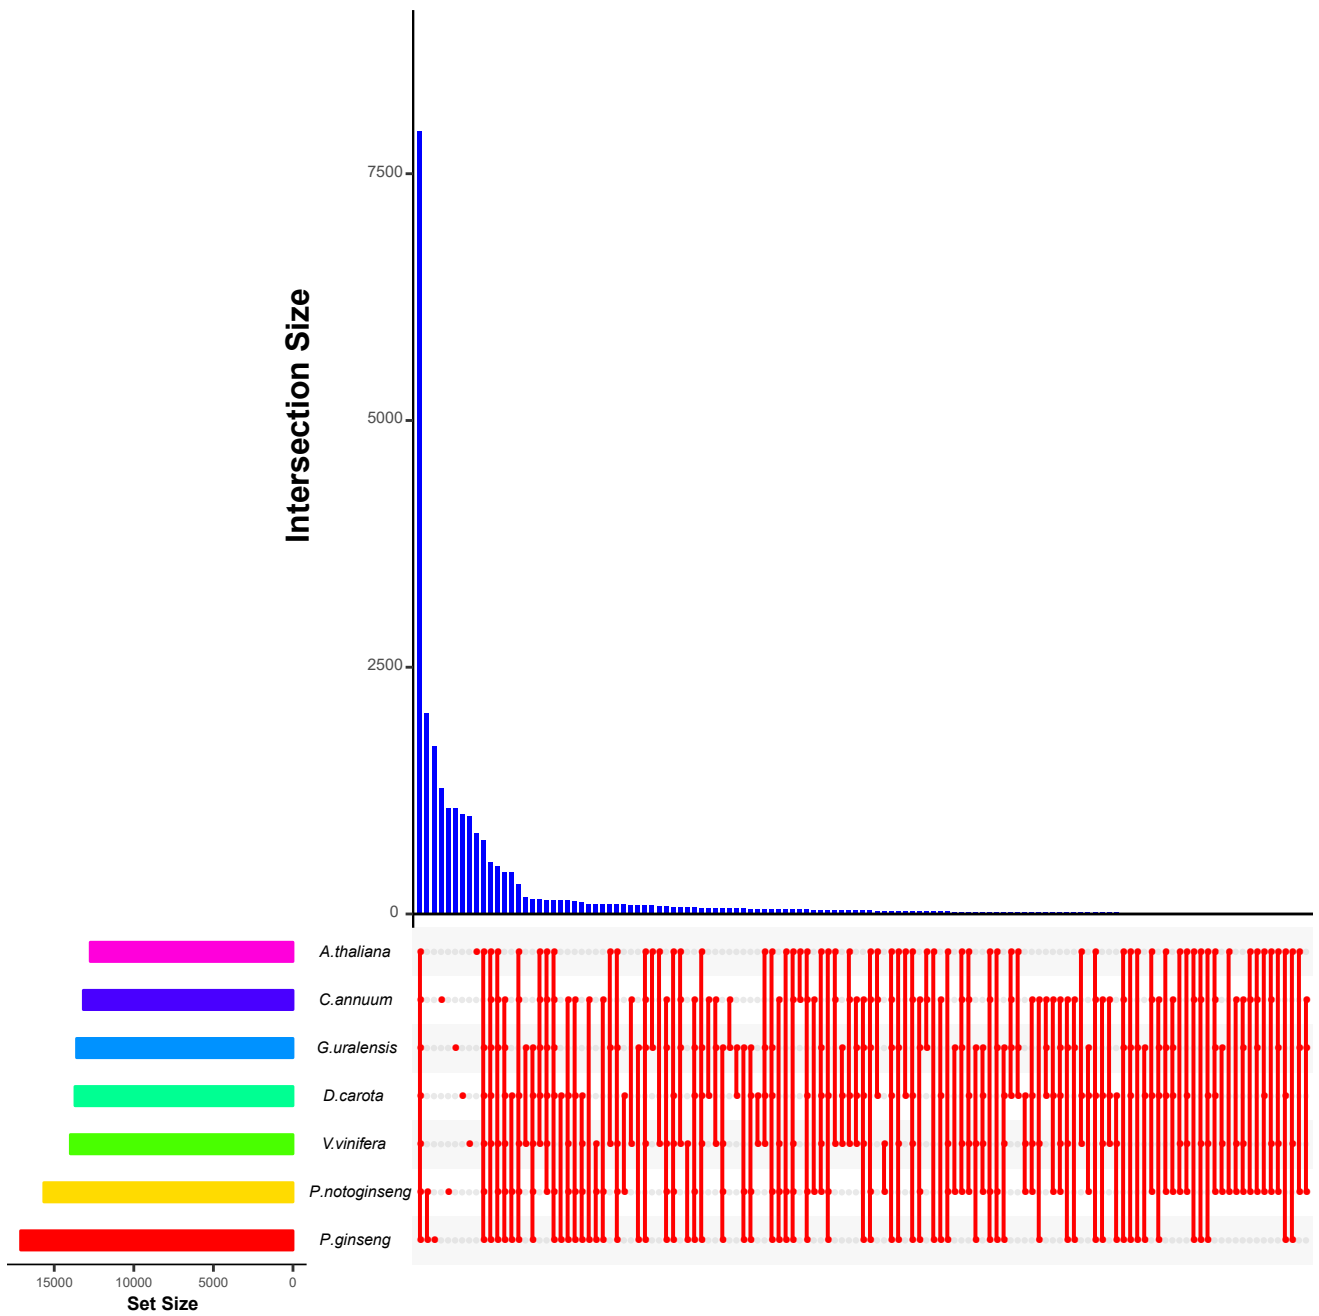

**Supplementary Figure 6. Venn diagram of distribution of gene families among the seven species.** The histogram on the left represents the number of gene families of each species. The red dots and lines on the right represent the gene family's classification between the designated species, and the number of each group is shown by the bar graph above.

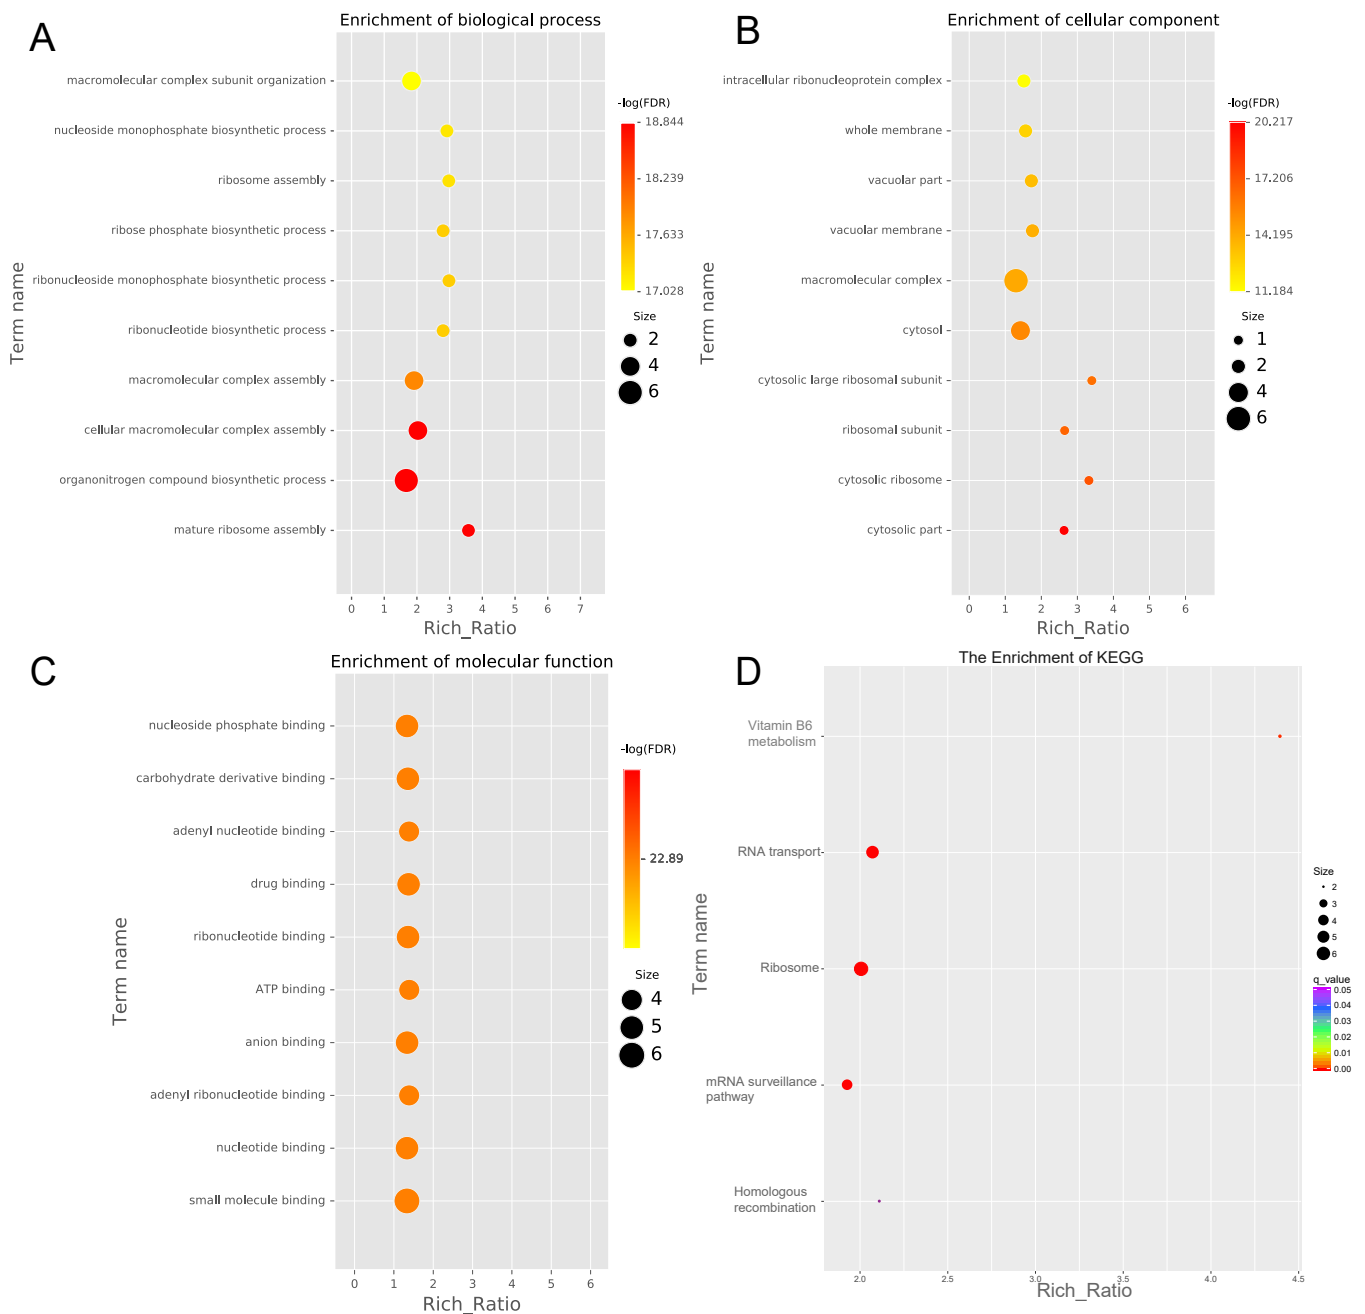

**Supplementary Figure 7. Enrichment analysis of GO and KEGG in *P. notoginseng*-specific gene families.** GO enrichment analysis includes three parts: biological process (A), cellular component (B) and molecular function (C). (D) KEGG enrichment analysis of *P. notoginseng*-specific genes. The larger the bubble radius, the higher the rich-ratio value and the redder the color of bubble, the higher the degree of enrichment.

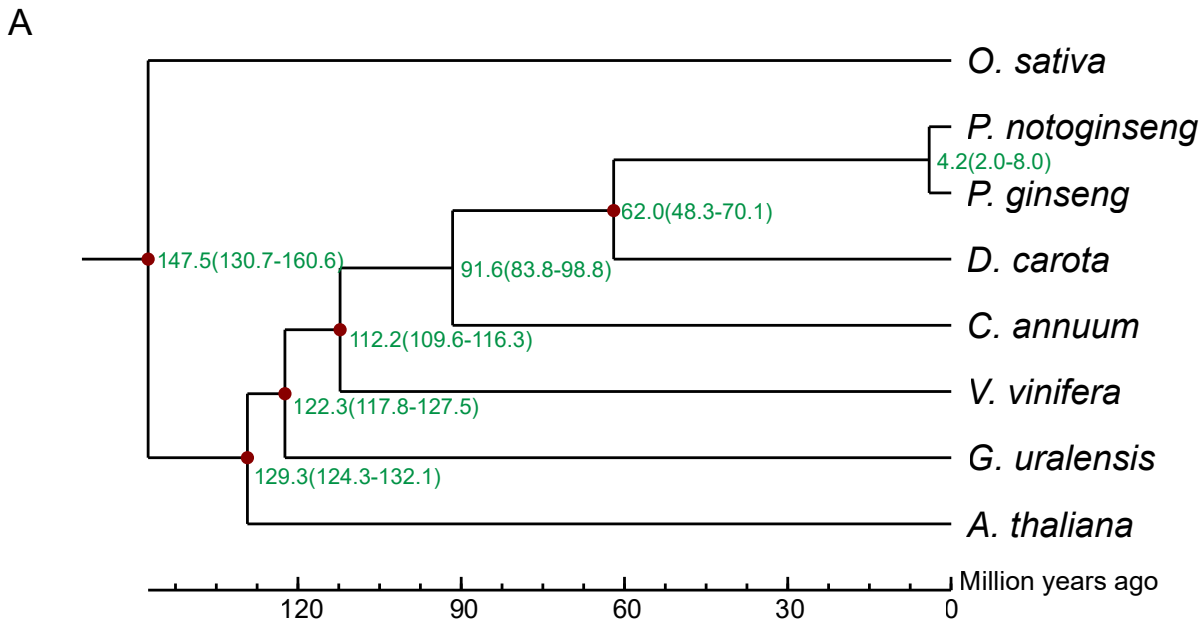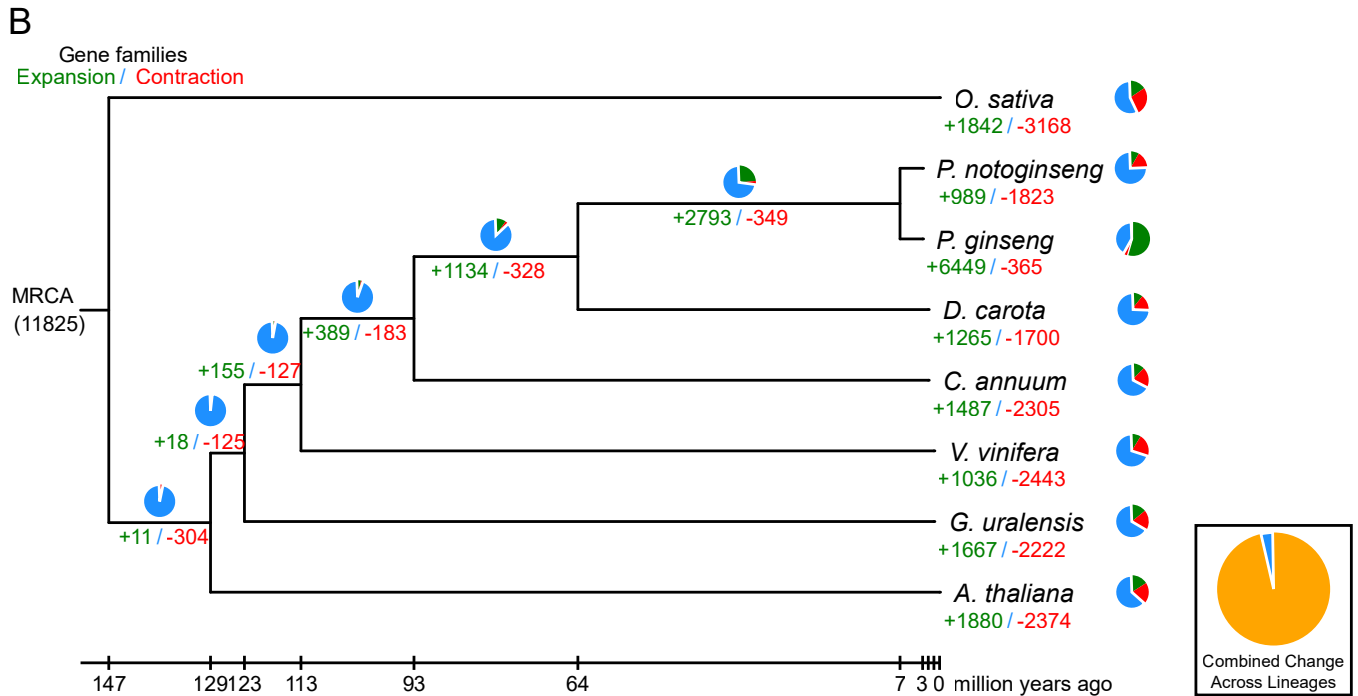

**Supplementary Figure 8. Evolution analysis of *P. notoginseng* genome.**

- (A) Estimated time of divergence between the eight species in the evolutionary process.  
 (B) Analysis of gene family expansion and contraction between the eight plant genomes.



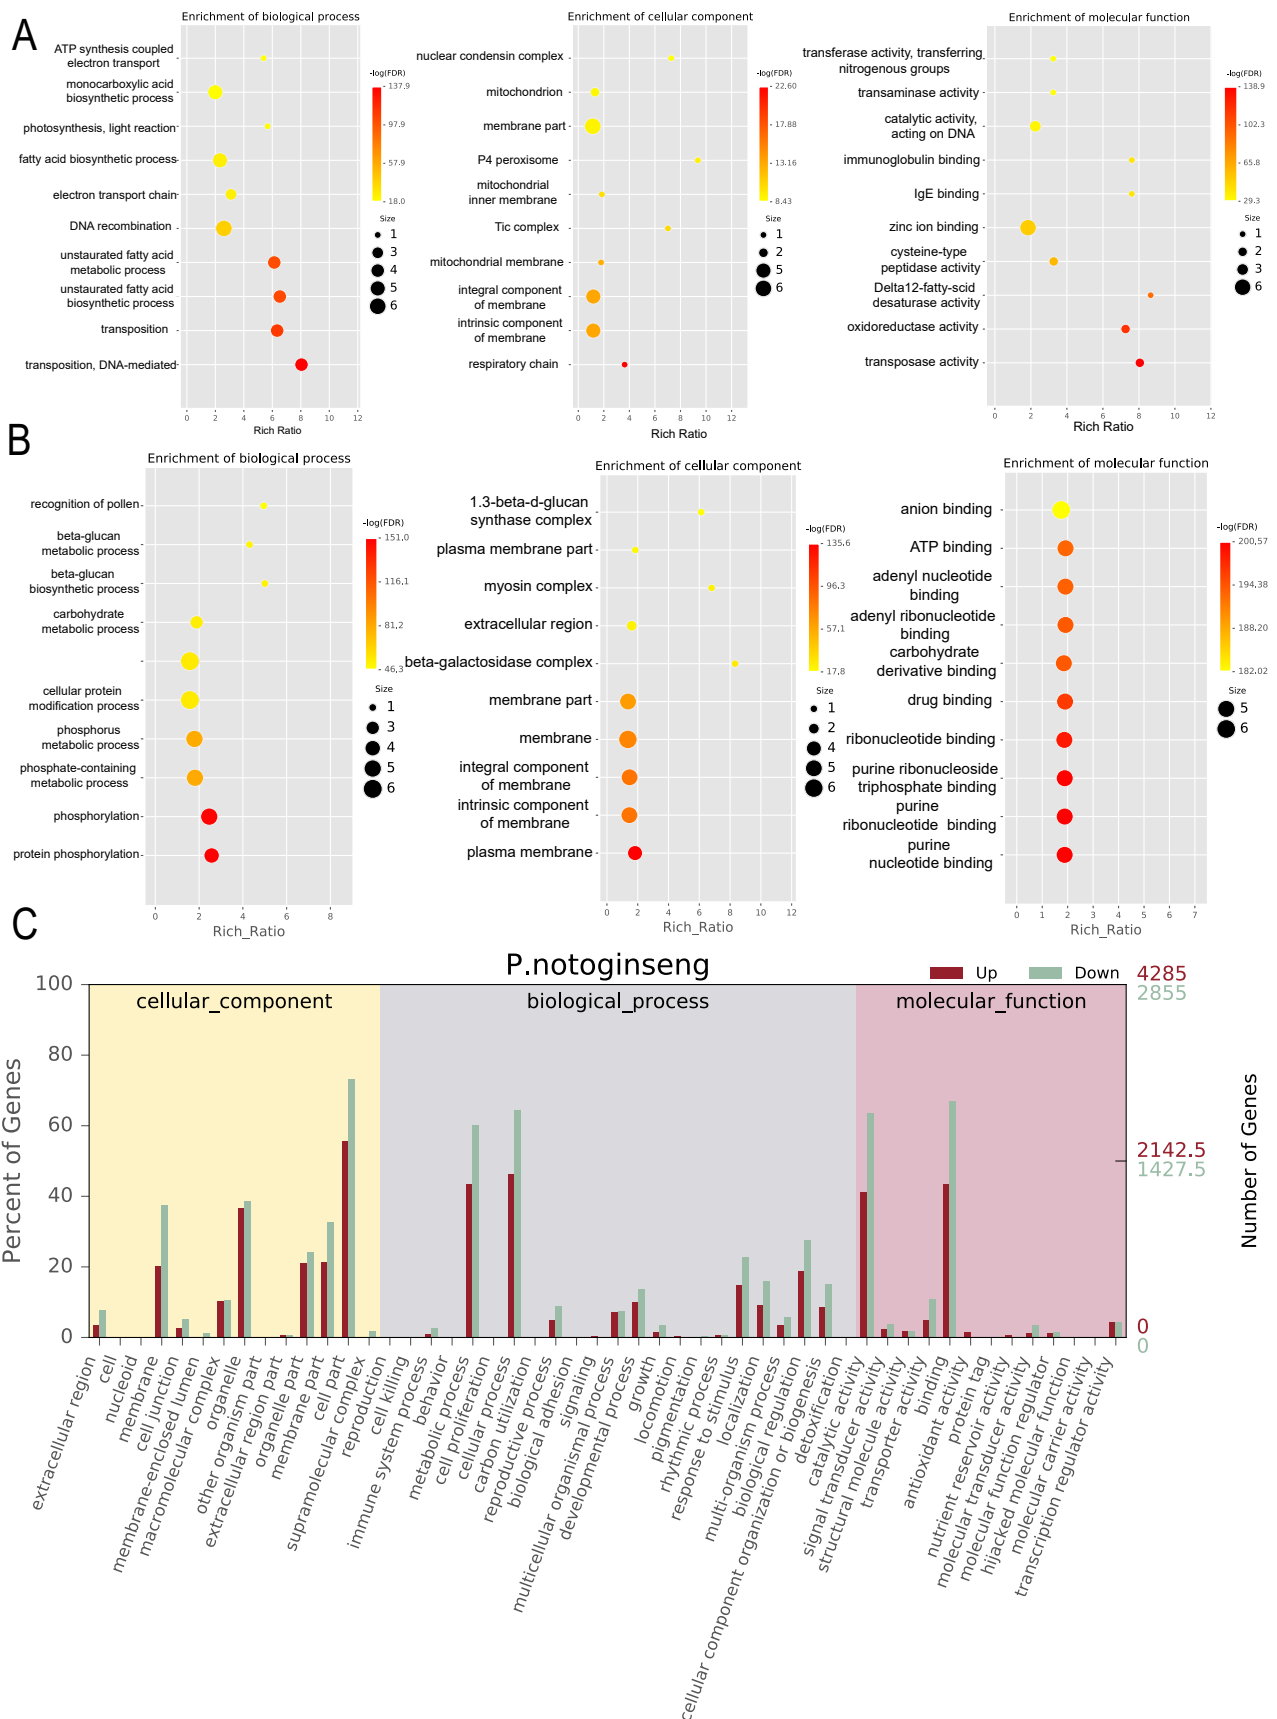

**Supplemental Figure 9. GO enrichment analysis of expanded and contracted gene families of *P. notoginseng* genome. (A) GO enrichment analysis of expanded gene families; (B) GO enrichment analysis of contracted gene families; (C) Summary of gene numbers expanding and contracting in different categories of GO enrichment analysis.**

Pno vs Vvi syntenic depths

2:1 pattern

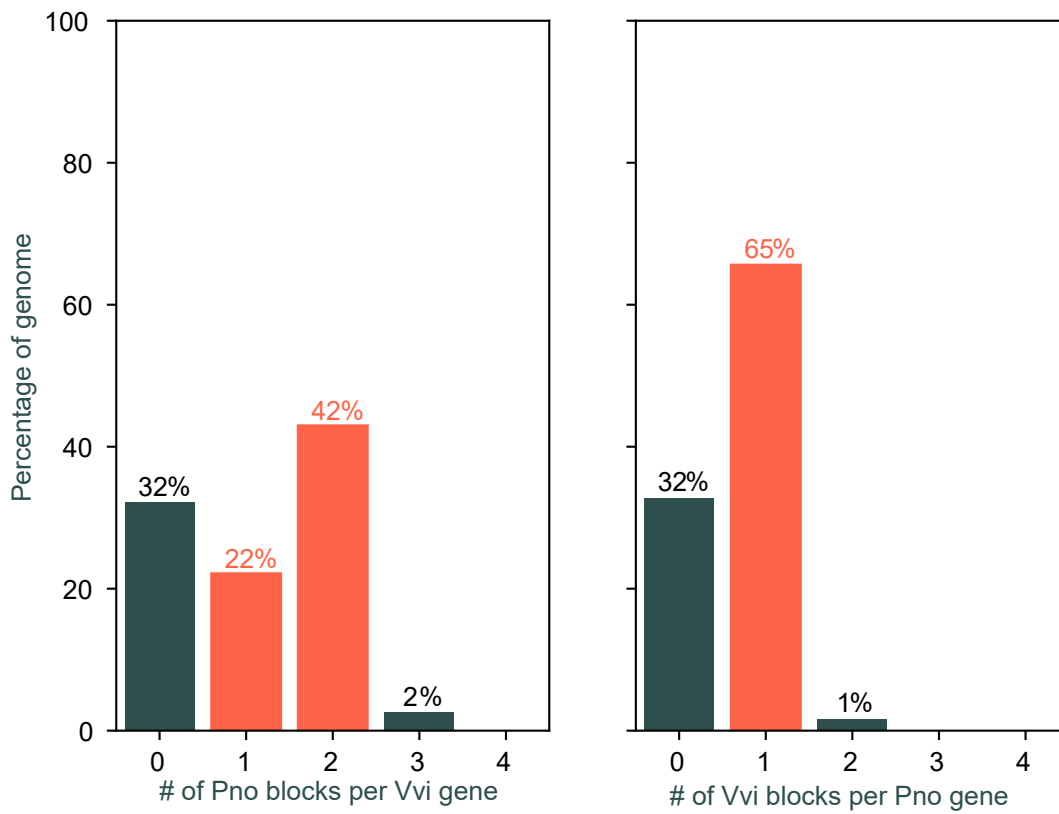

**Supplementary Figure 10. Summary of the syntenic analysis between *P. notoginseng* and *V. vinifera* (n=1 biologically independent samples).**

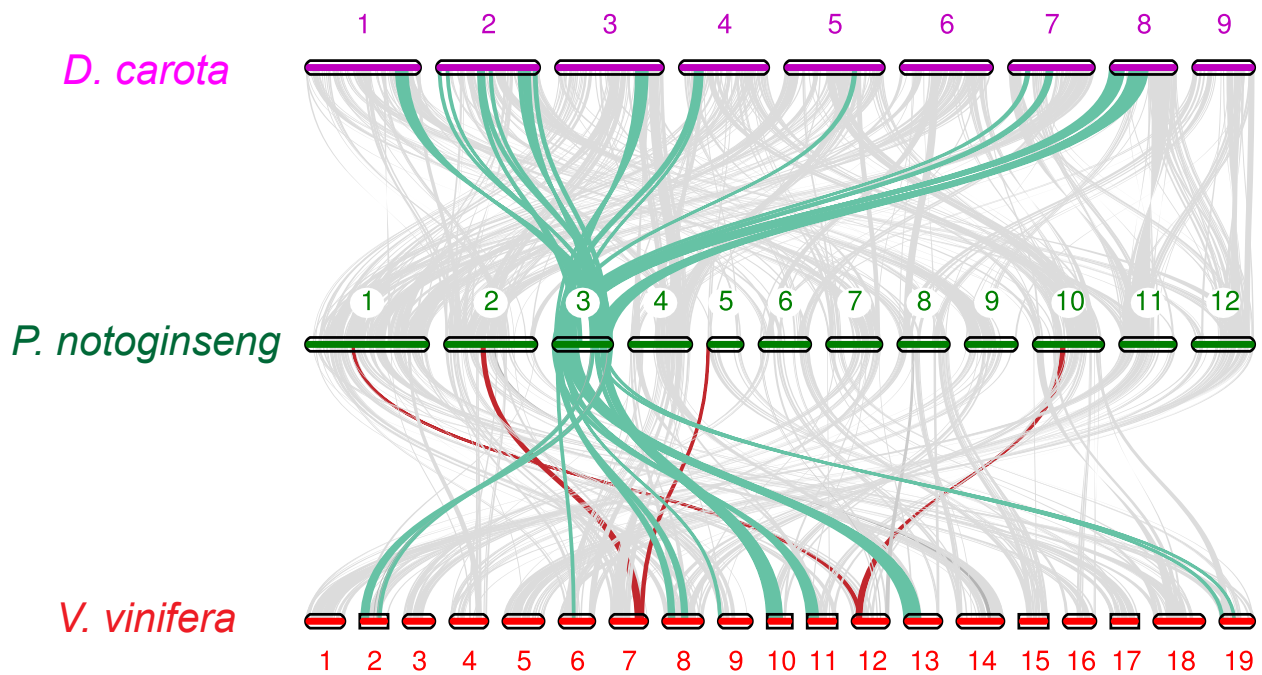

**Supplementary Figure 11. Collinear analysis among *D. carota*, *P. notoginseng* and *V. vinifera* genome.** The red lines in the genomes of *P. notoginseng* and *V. vinifera* indicate that the 1:2 correspondence between the two collinear regions.

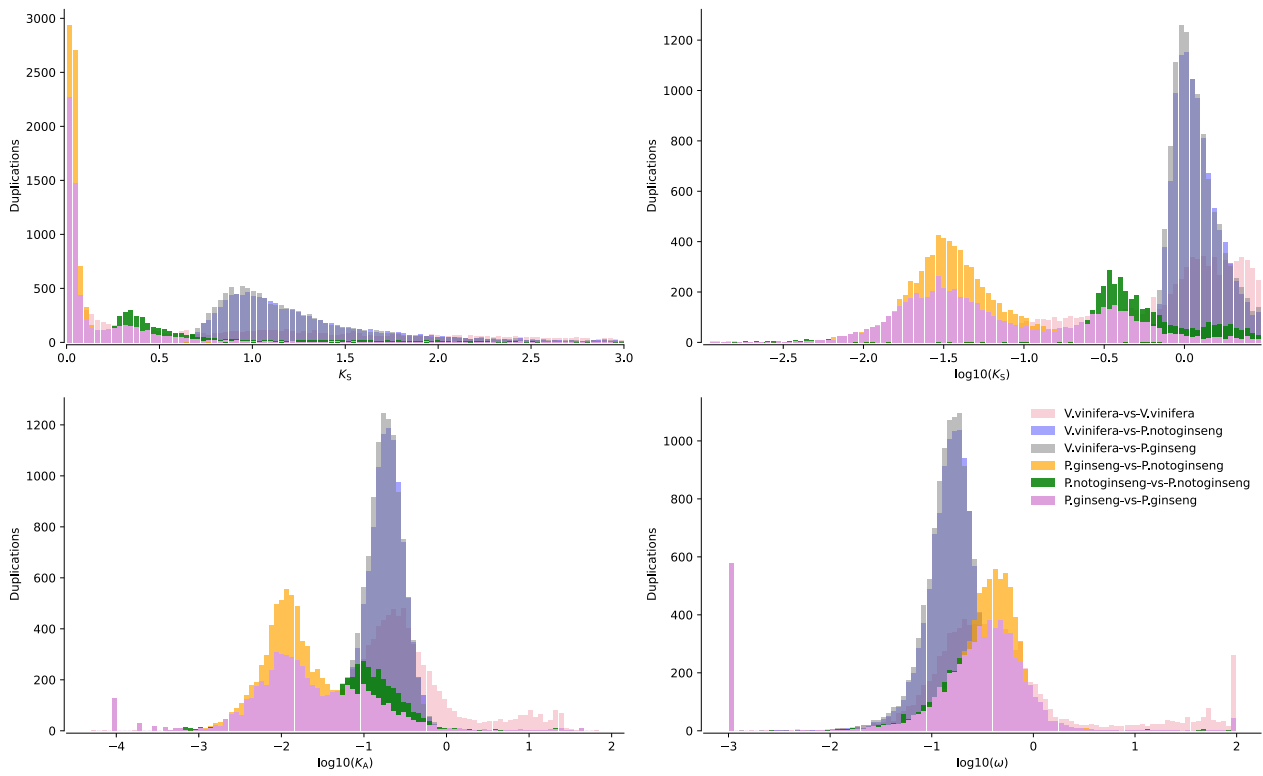

**Supplementary Figure 12. Synonymous substitution rate ( $K_s$ ) distributions of syntenic blocks in *P. notoginseng* and comparison with *P. ginseng* and *V. vinifera* genome.**

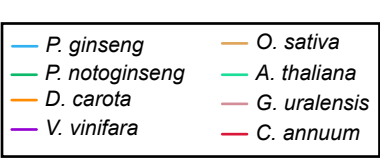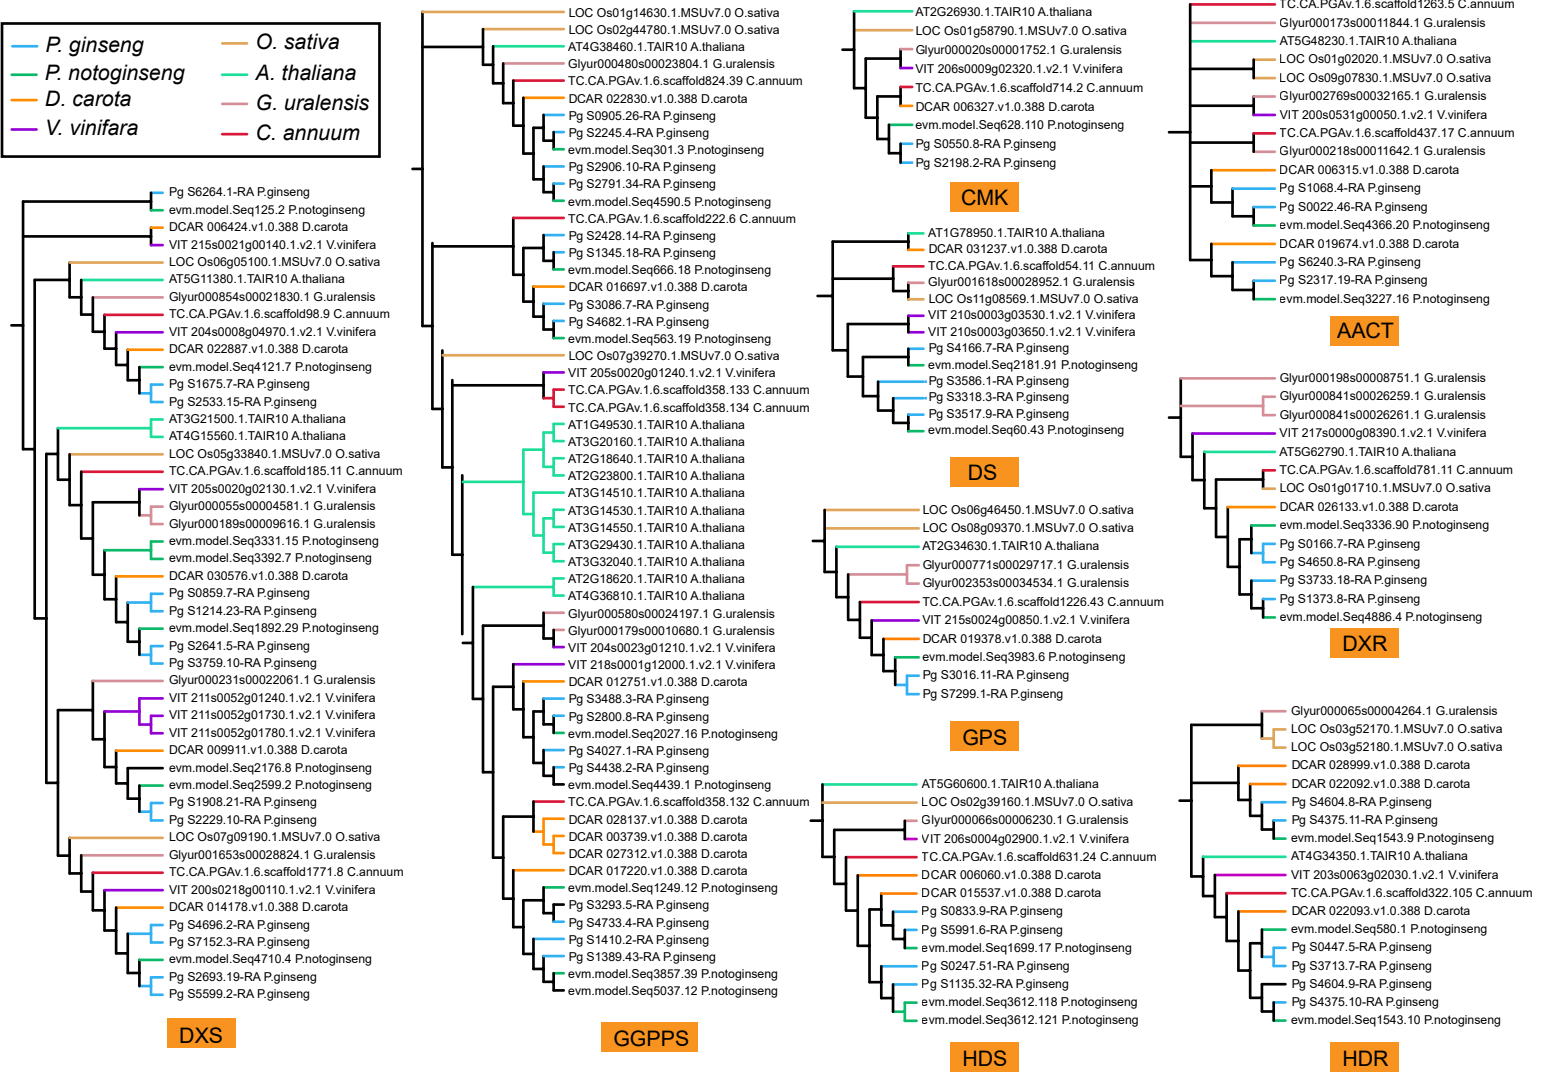

**Supplemental Figure 13. Phylogenetic tree of key enzyme genes in terpenoid biosynthetic pathway in 8 species including *P. notoginseng*, *P. ginseng*, *D. carota*, *V. vinifera*, *O. sativa*, *A. thaliana*, *G. uralensis* and *C. annuum* (1).** Each phylogenetic tree of terpenoid biosynthetic genes was constructed by using MEGA X with the neighbor-joining method.

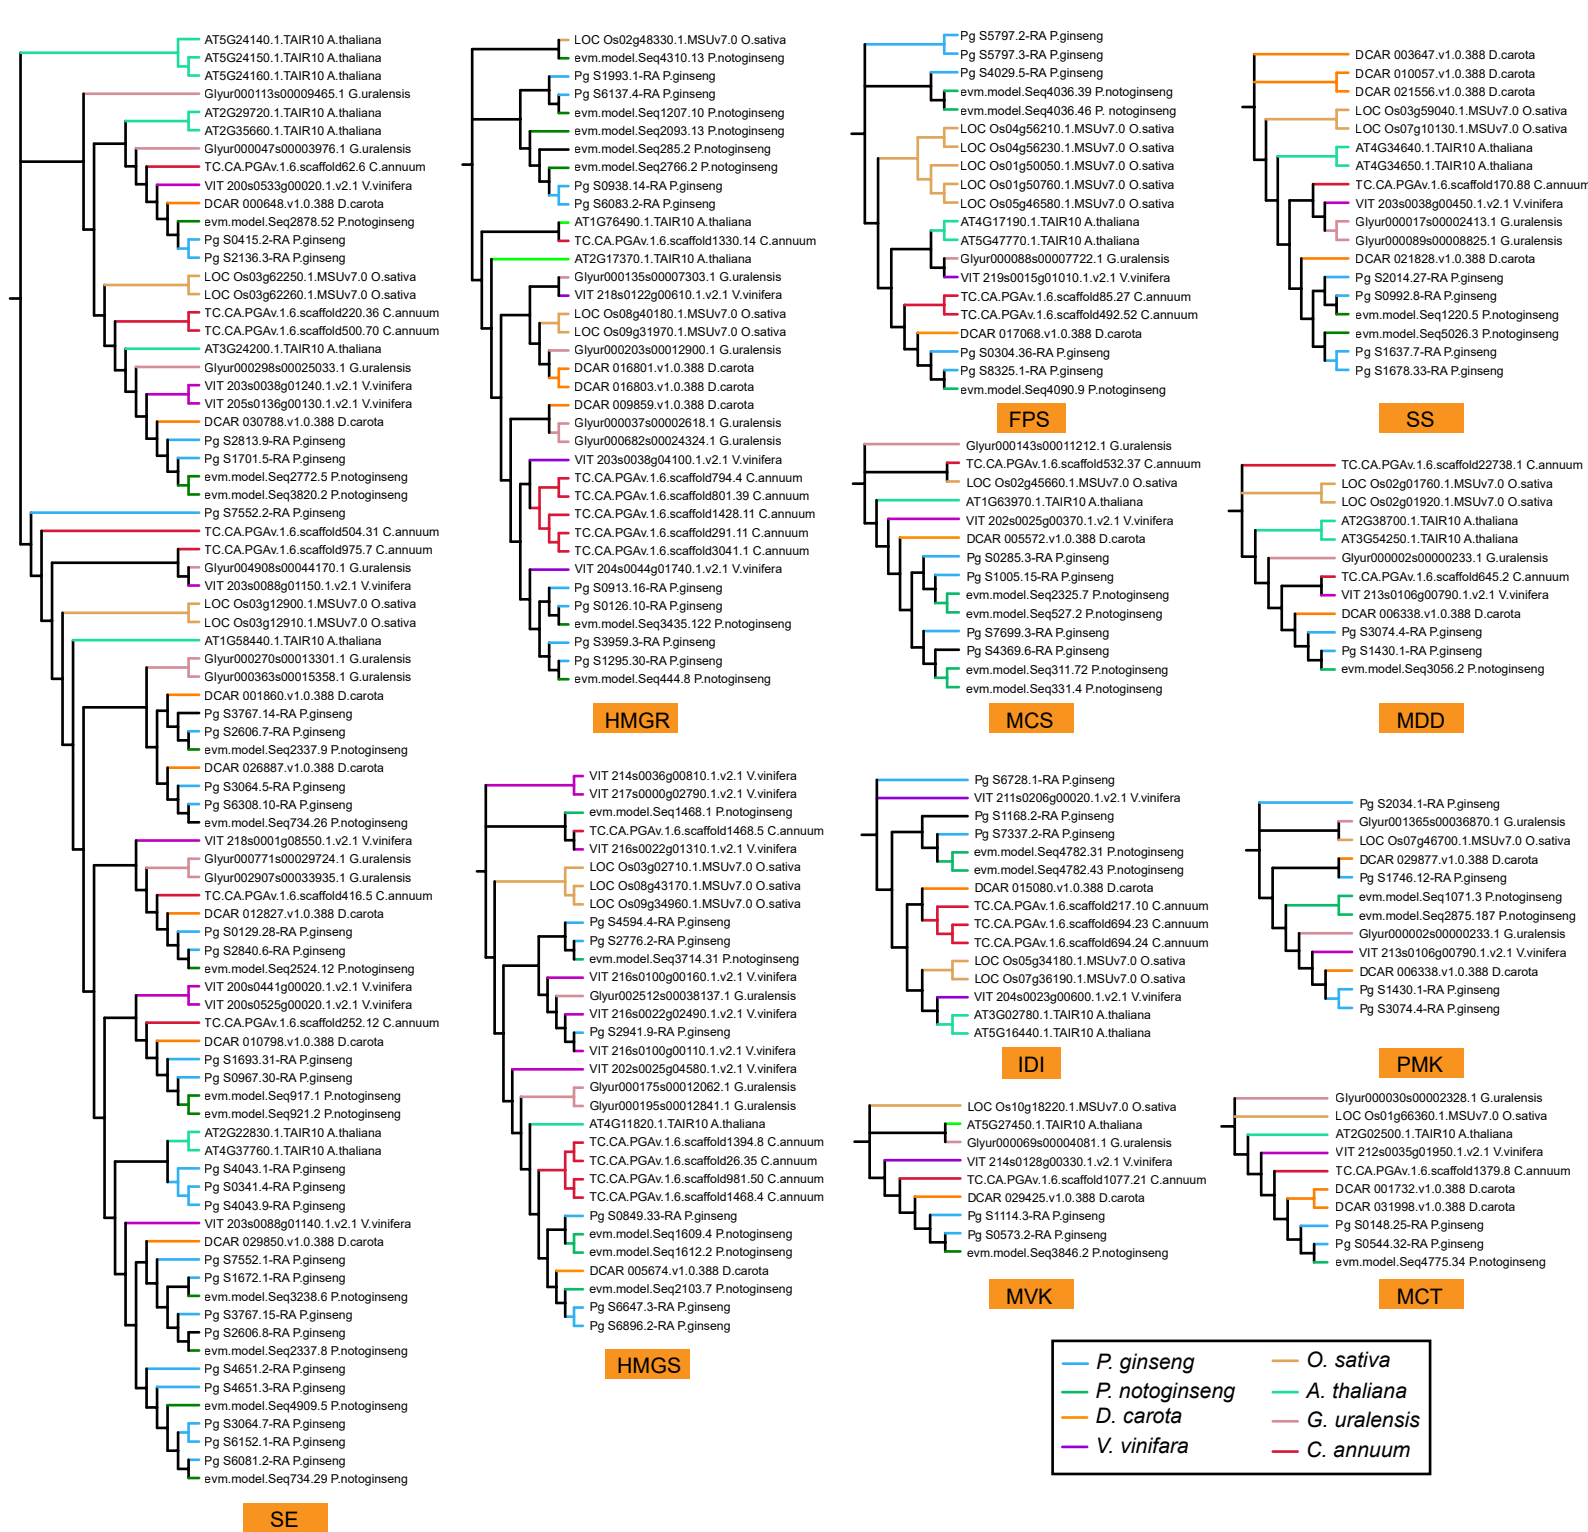

**Supplemental Figure 14. Phylogenetic trees of key enzyme genes involved in terpenoid biosynthetic pathway in 8 species including *P. notoginseng*, *P. ginseng*, *D. carota*, *V. vinifera*, *O. sativa*, *A. thaliana*, *G. uralensis* and *C. annuum* (2).** Each phylogenetic tree of terpenoid biosynthetic genes was constructed by using MEGA X with the neighbor-joining method.

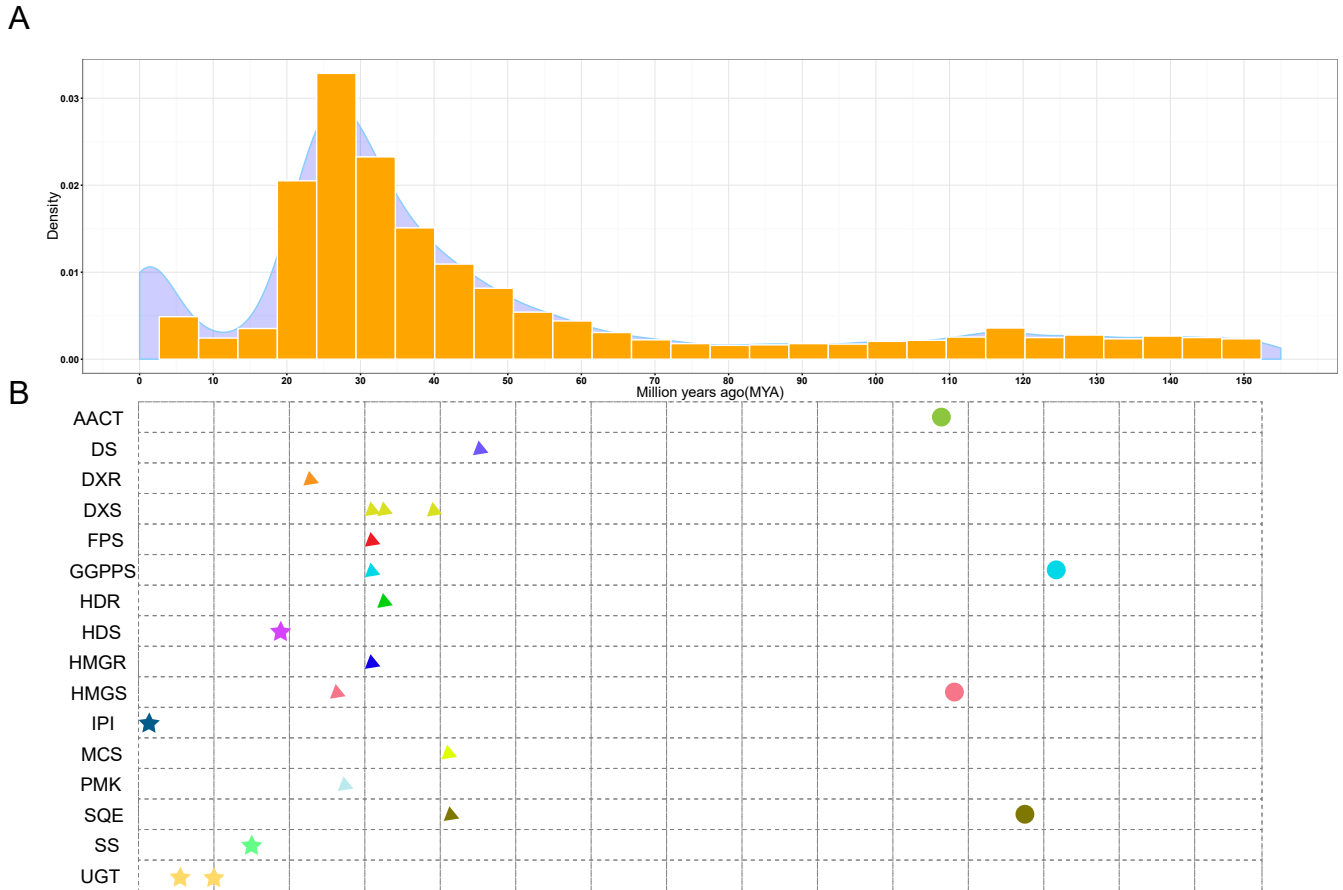

**Supplemental Figure 15. Evolution of ginsenoside-associated genes in *P. notoginseng*.**

**(A)** Genome duplication in *P. notoginseng*. The calculated  $Ks$  value was converted to the divergence time according to  $T=Ks/2r$ , where  $r$  represents a substitution rate of  $6.5 \times 10^{-9}$  mutations per site per year for eudicots ( $n=1$  biologically independent samples). **(B)**

Duplication event(s) for each gene pair is(are) shown along the timeline from 0 to 150 million years ago with different colors.

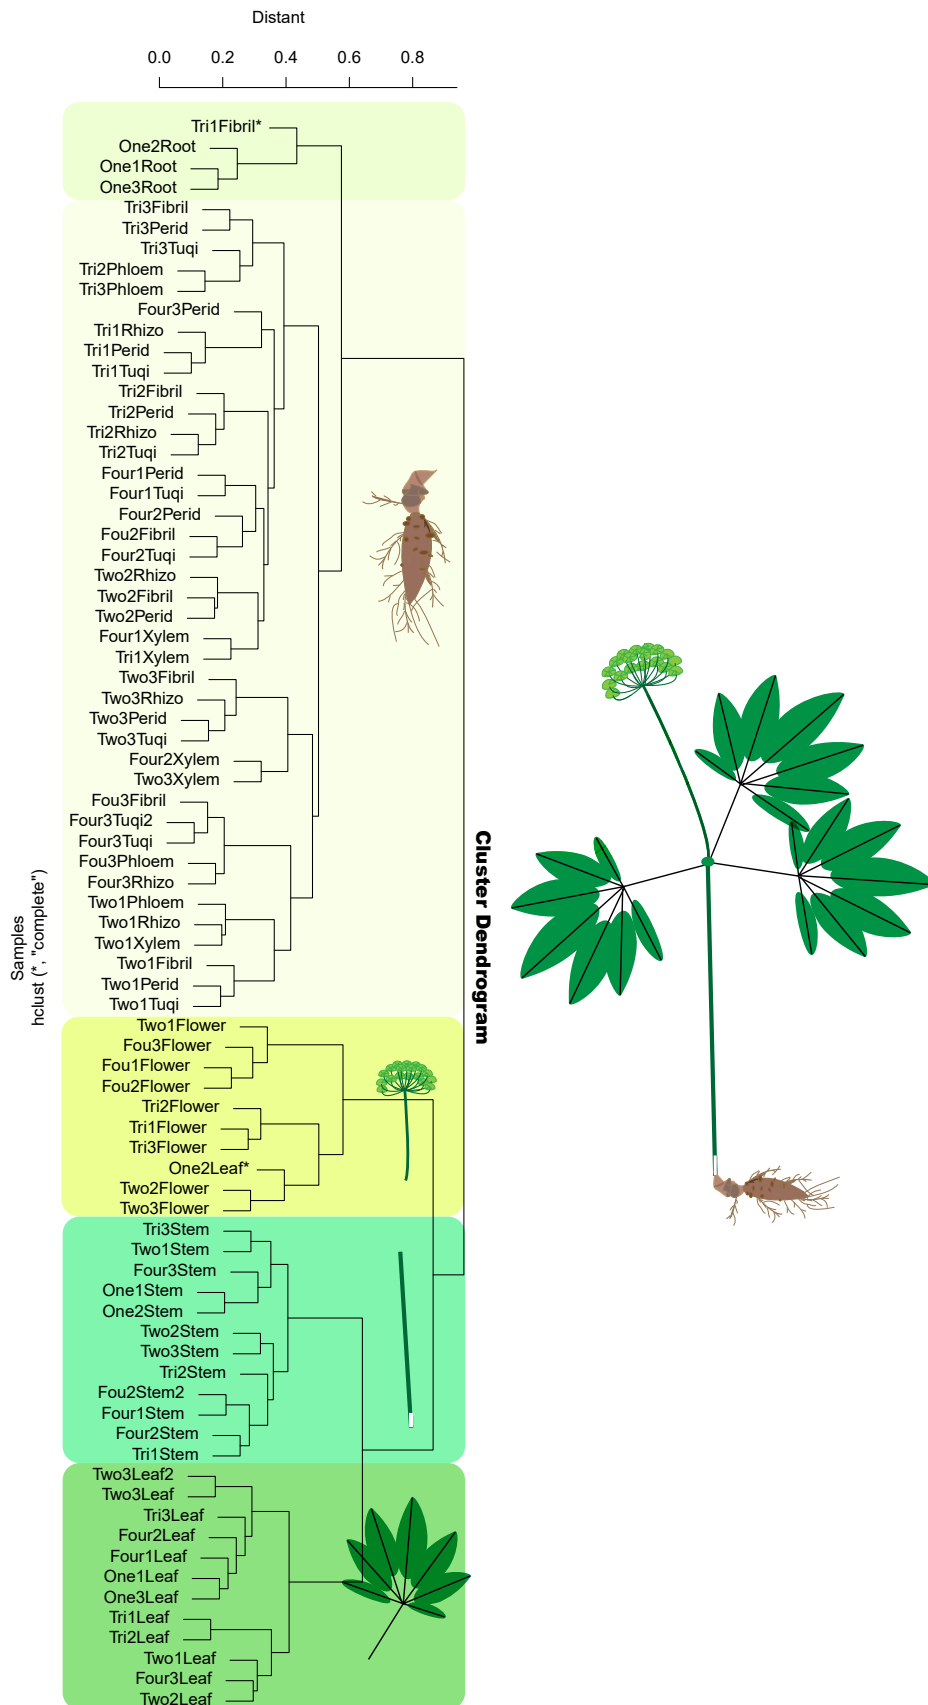

**Supplemental Figure 16. Overview of clustering of transcriptome samples.**



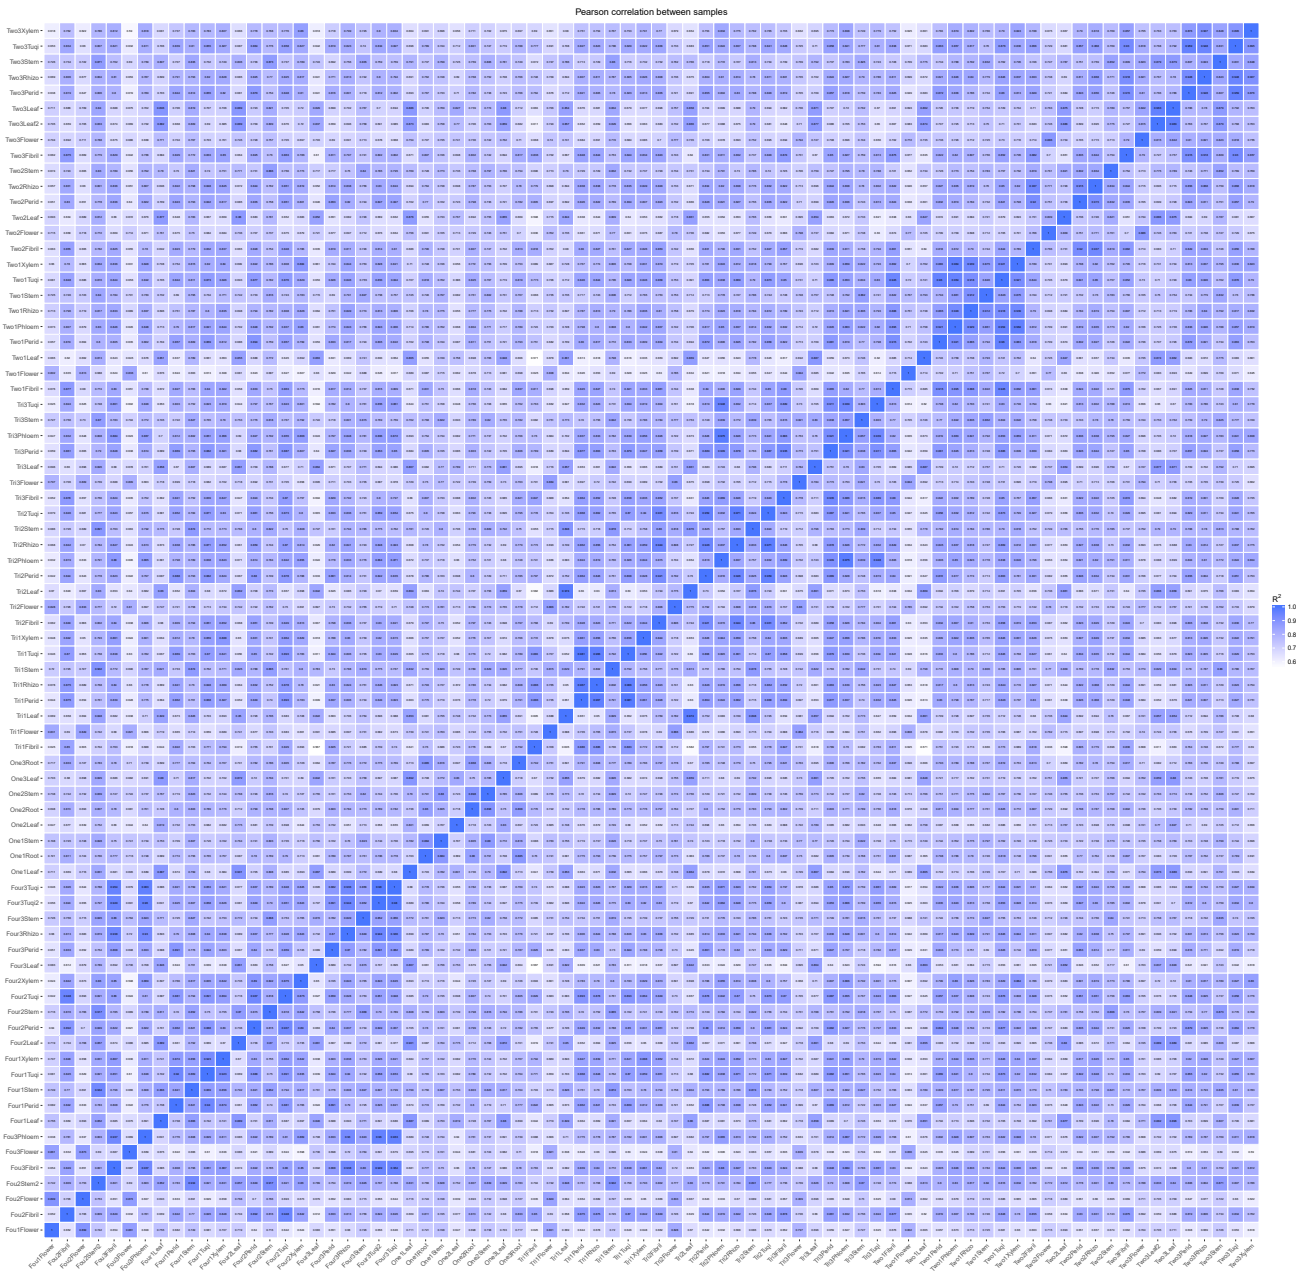

**Supplemental Figure 17. Pearson correlation analysis of transcriptome samples.**  
 The R<sup>2</sup> value between two random transcripts were indicated in the box, and ranging from white to blue indicated from low to high (0-1).

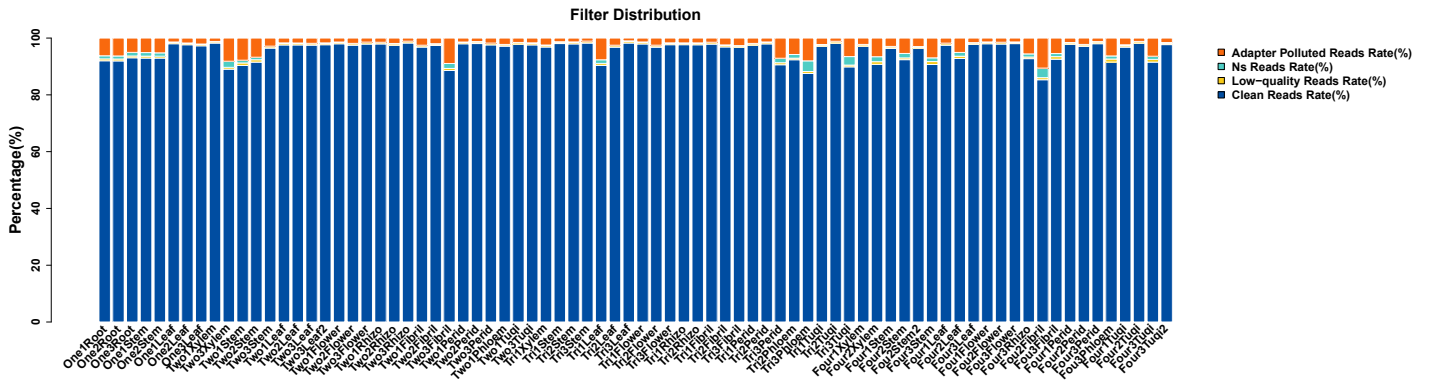

**Supplemental Figure 18. The proportion distribution of various reads before filtering in all samples.**

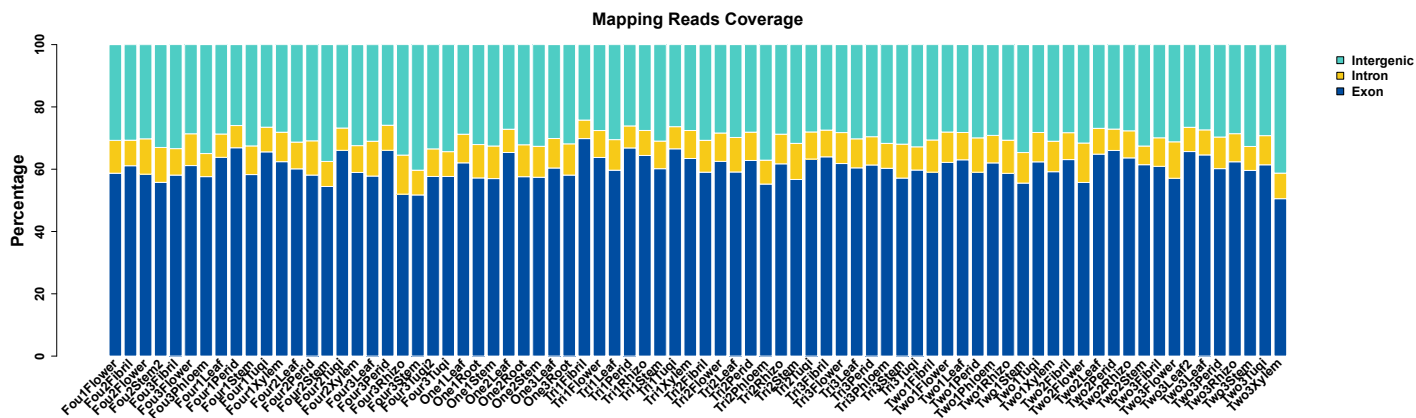

**Supplemental Figure 19. The coverage distribution of gene regions mapping on genome in each transcript.**



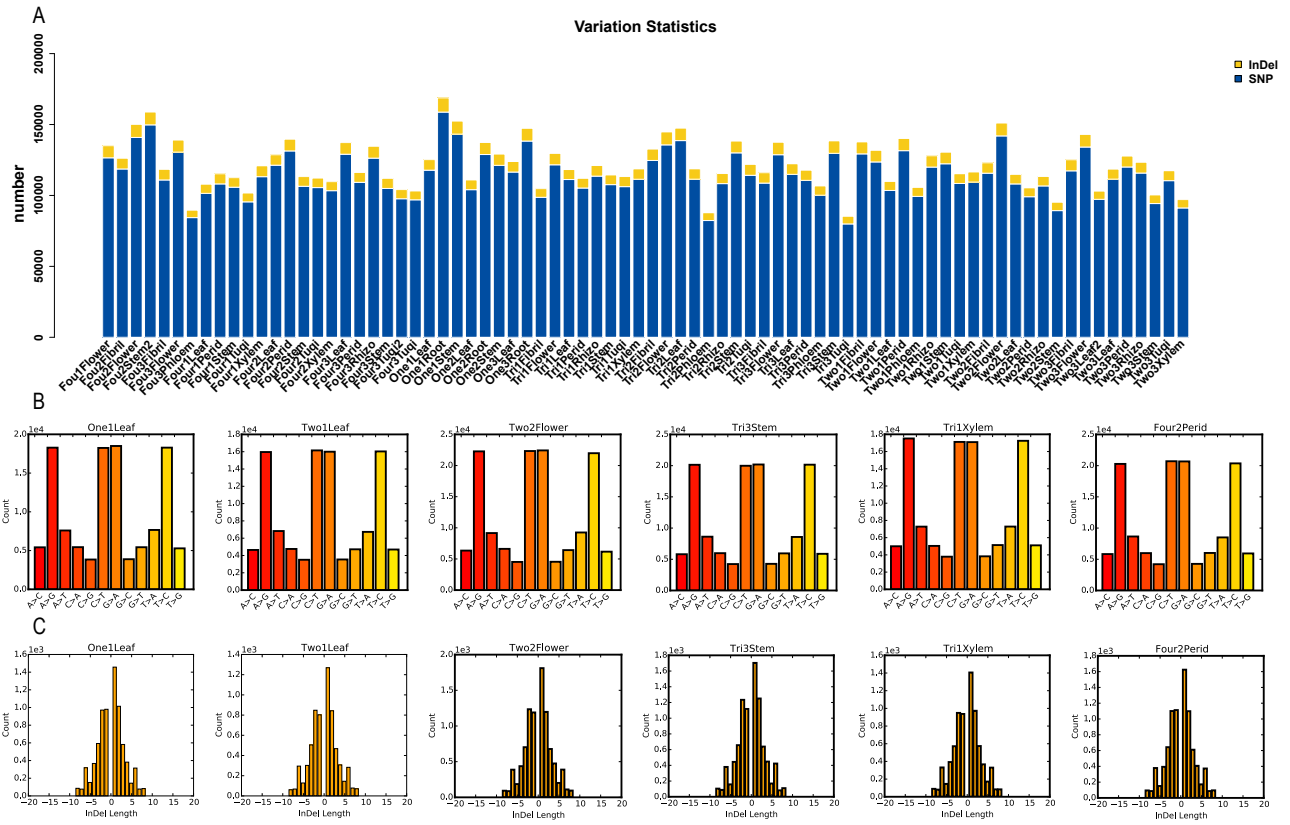

**Supplemental Figure 21. Variation analysis of each sample. (A)** distribution of each variant type; **(B)** according to the detected SNP loci, the frequency of each mutation type has been counted, taking the data results of One1Leaf, Two1Leaf, Two2Flower, Tri3Stem, Tri1Xylem, Fou2Perid as examples; **(C)** according to the detected InDel loci, the frequency of each InDel length has been counted, taking the data results of One1Leaf, Two1Leaf, Two2Flower, Tri3Stem, Tri1Xylem, Fou2Perid as examples.

## Distribution of Sample Expression

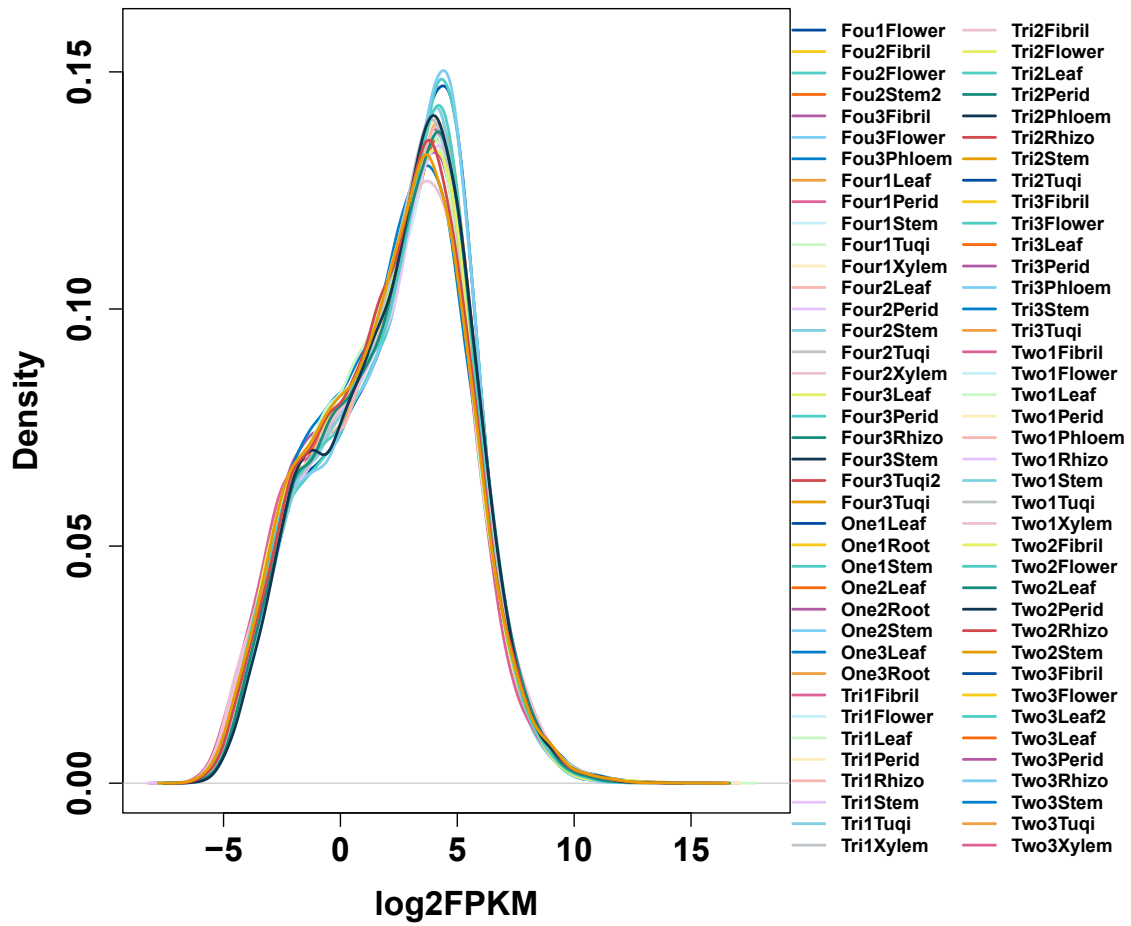

Supplemental Figure 22. Density distribution diagram of gene expression in each transcriptome sample.

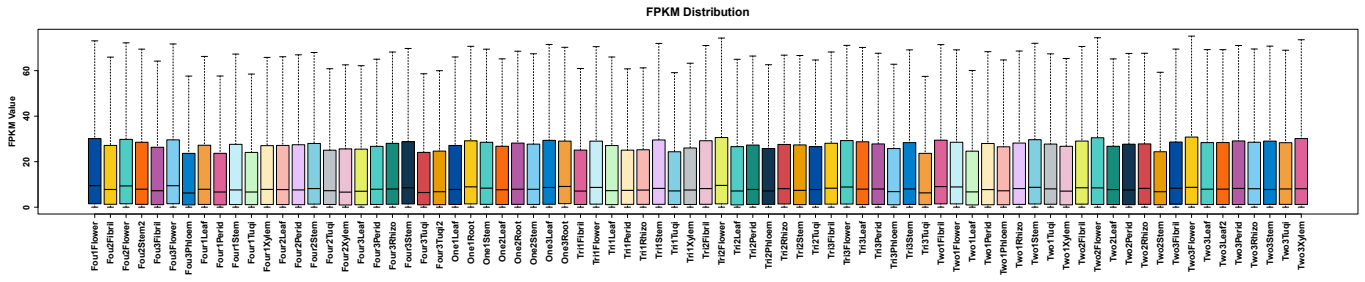

**Supplemental Figure 23. Box plot of the overall distribution of gene expression in each transcriptome sample.**

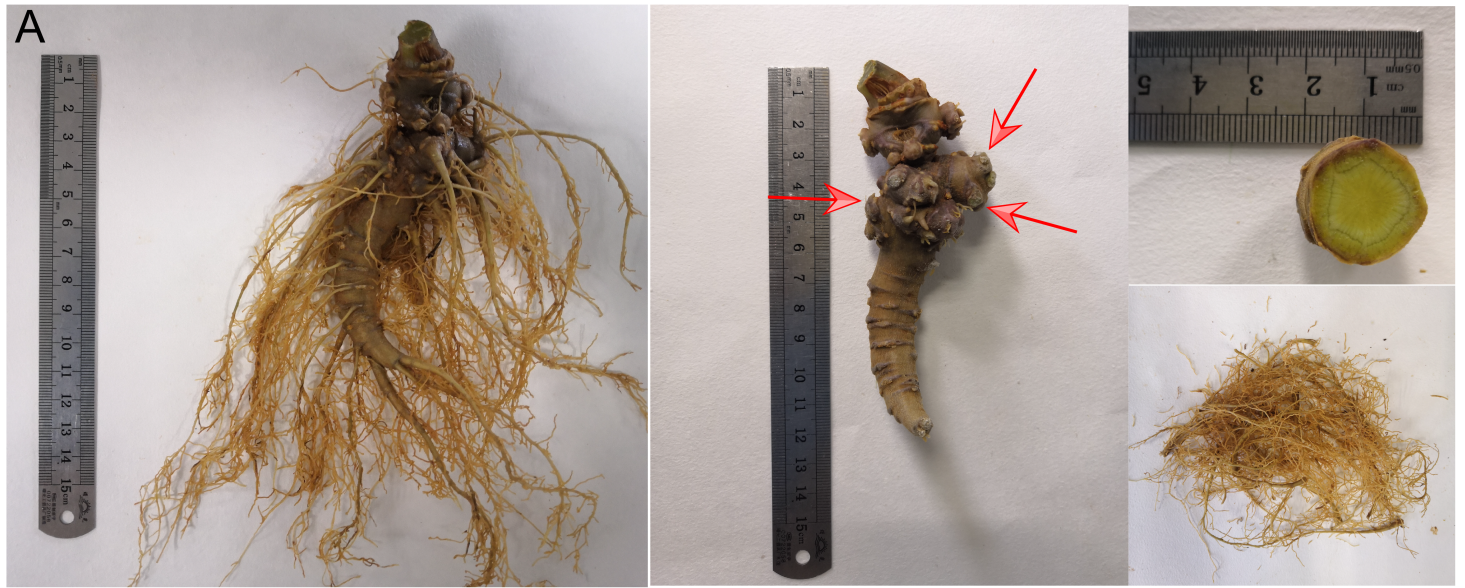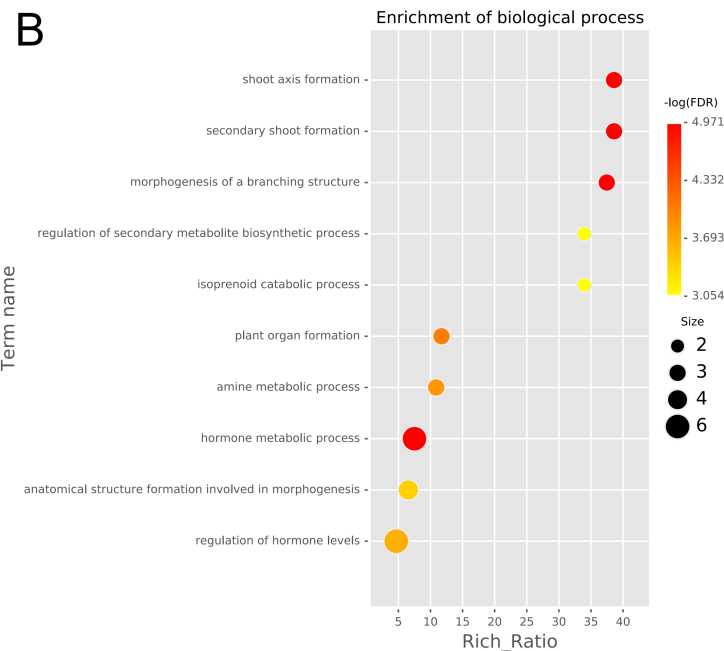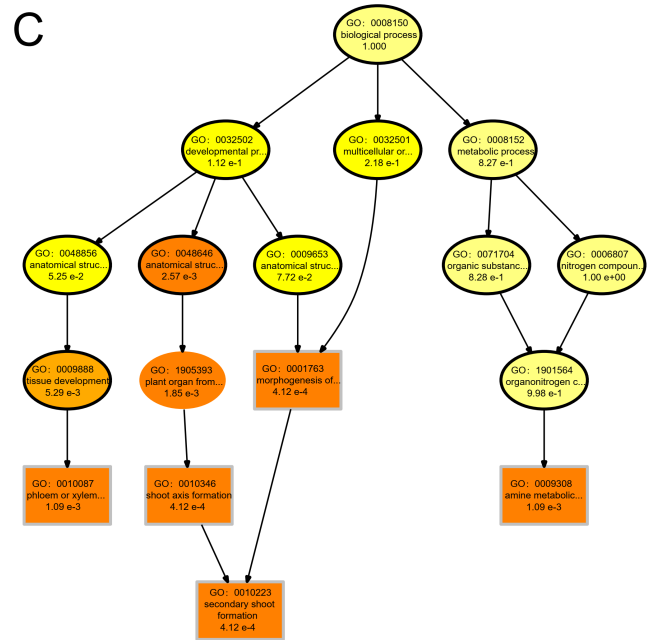

**Supplementary Figure 24. The exploration of the molecular mechanism of the formation of *P. notoginseng*'s tubercles. (A) the display of root morphology of *P. notoginseng*, and the red arrow points to the tubercles. (B) GO enrichment analysis of DEGs between the periderm and tubercle group. (C) the Directed Acyclic Graph (DAG) of GO enrichment analysis, the darker color indicates the more significant enrichment and the red is the most significant. The larger the bubble radius, the higher the rich-ratio value and the redder the color of bubble, the higher the degree of enrichment.**



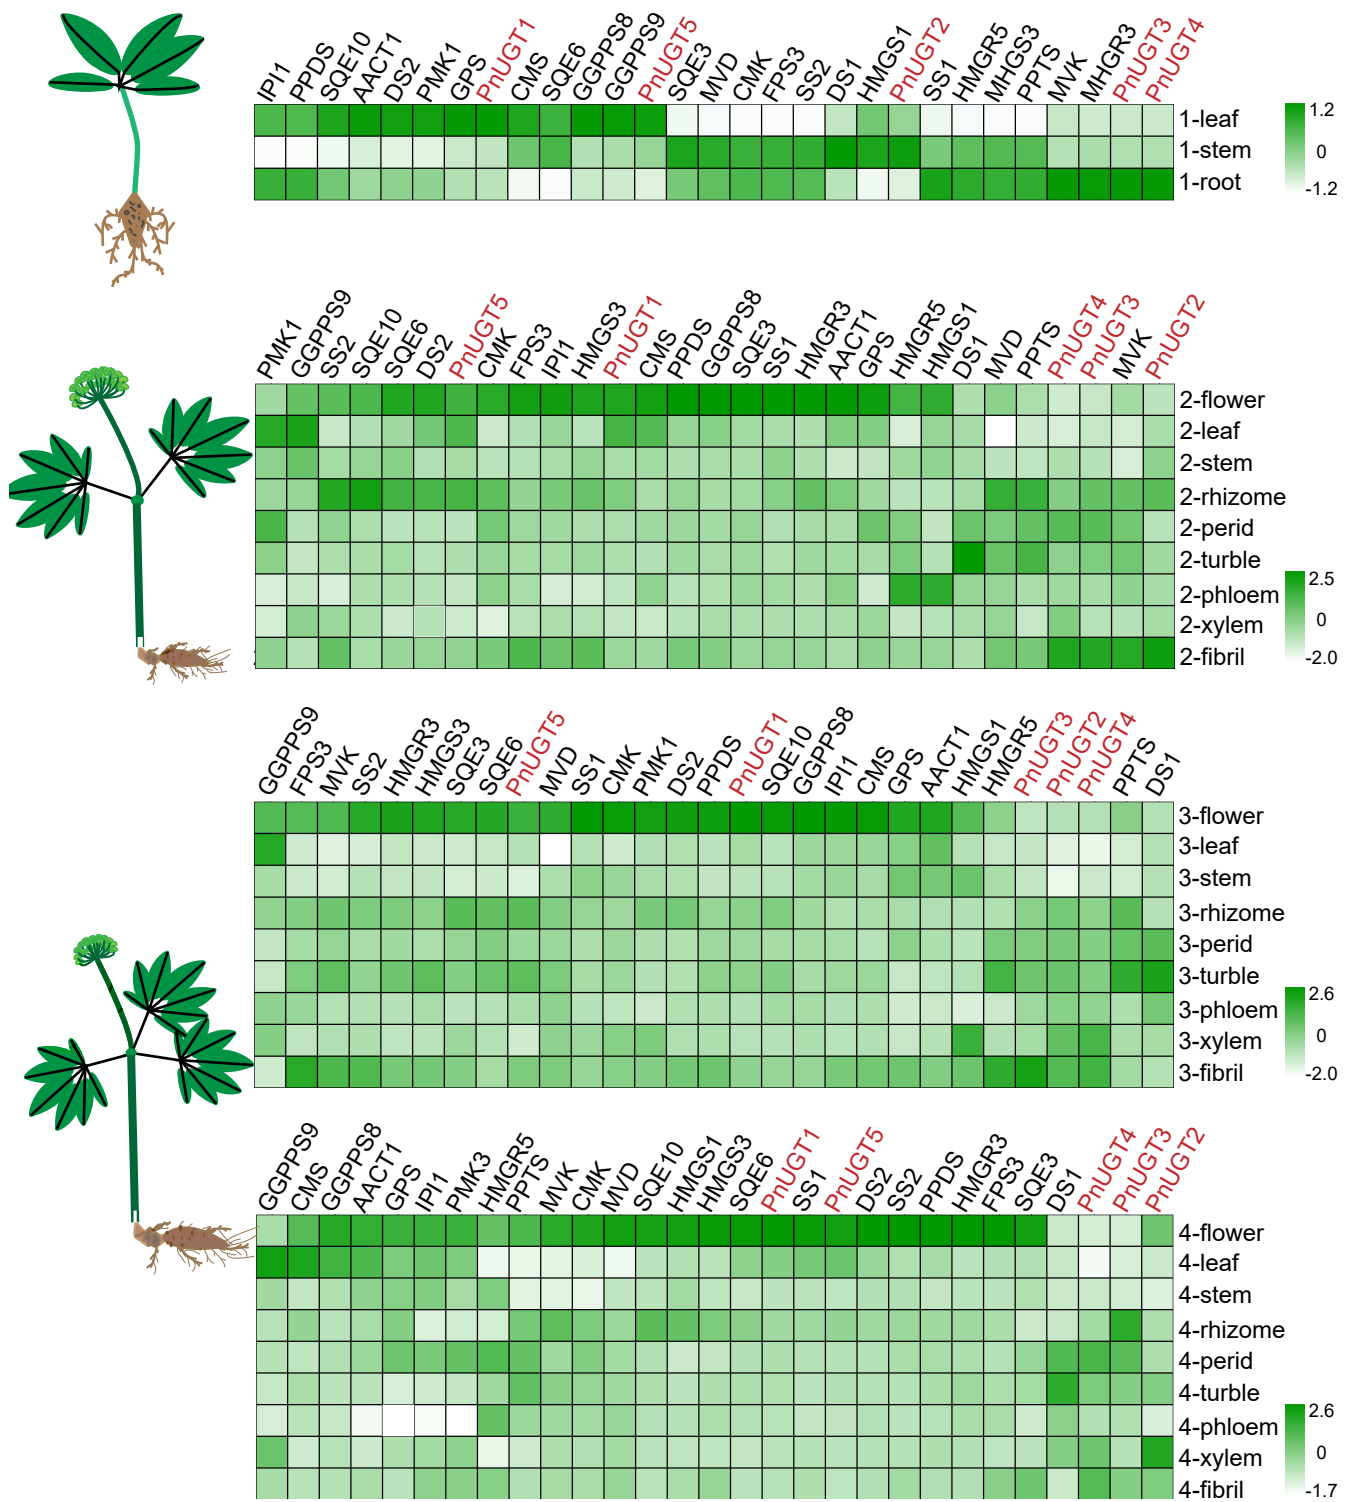

**Supplementary Figure 25. Spatial expression profile of key enzyme genes in saponin biosynthesis pathway.** The genes in red font are the functional UGT cloned in this study.



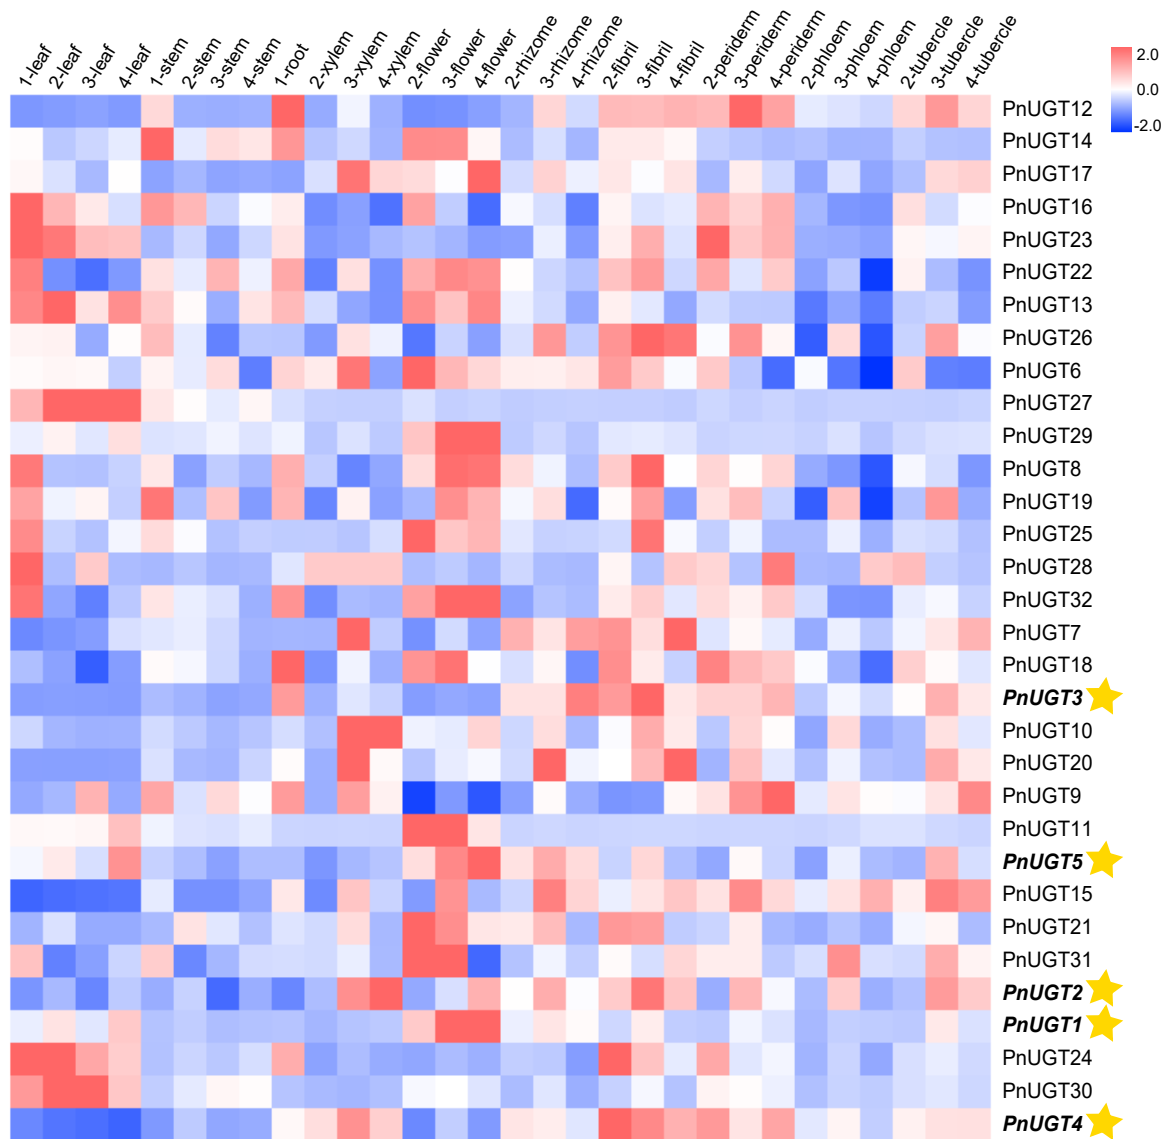

**Supplemental Figure 27. Heat map of the expression of the cloned UGT genes in different transcript samples.** The genes marked by five-pointed stars are those with catalytic function identified in this study. In the heat map, the relative expression level from high to low (-2 to 2) is represented by the range from blue to red.



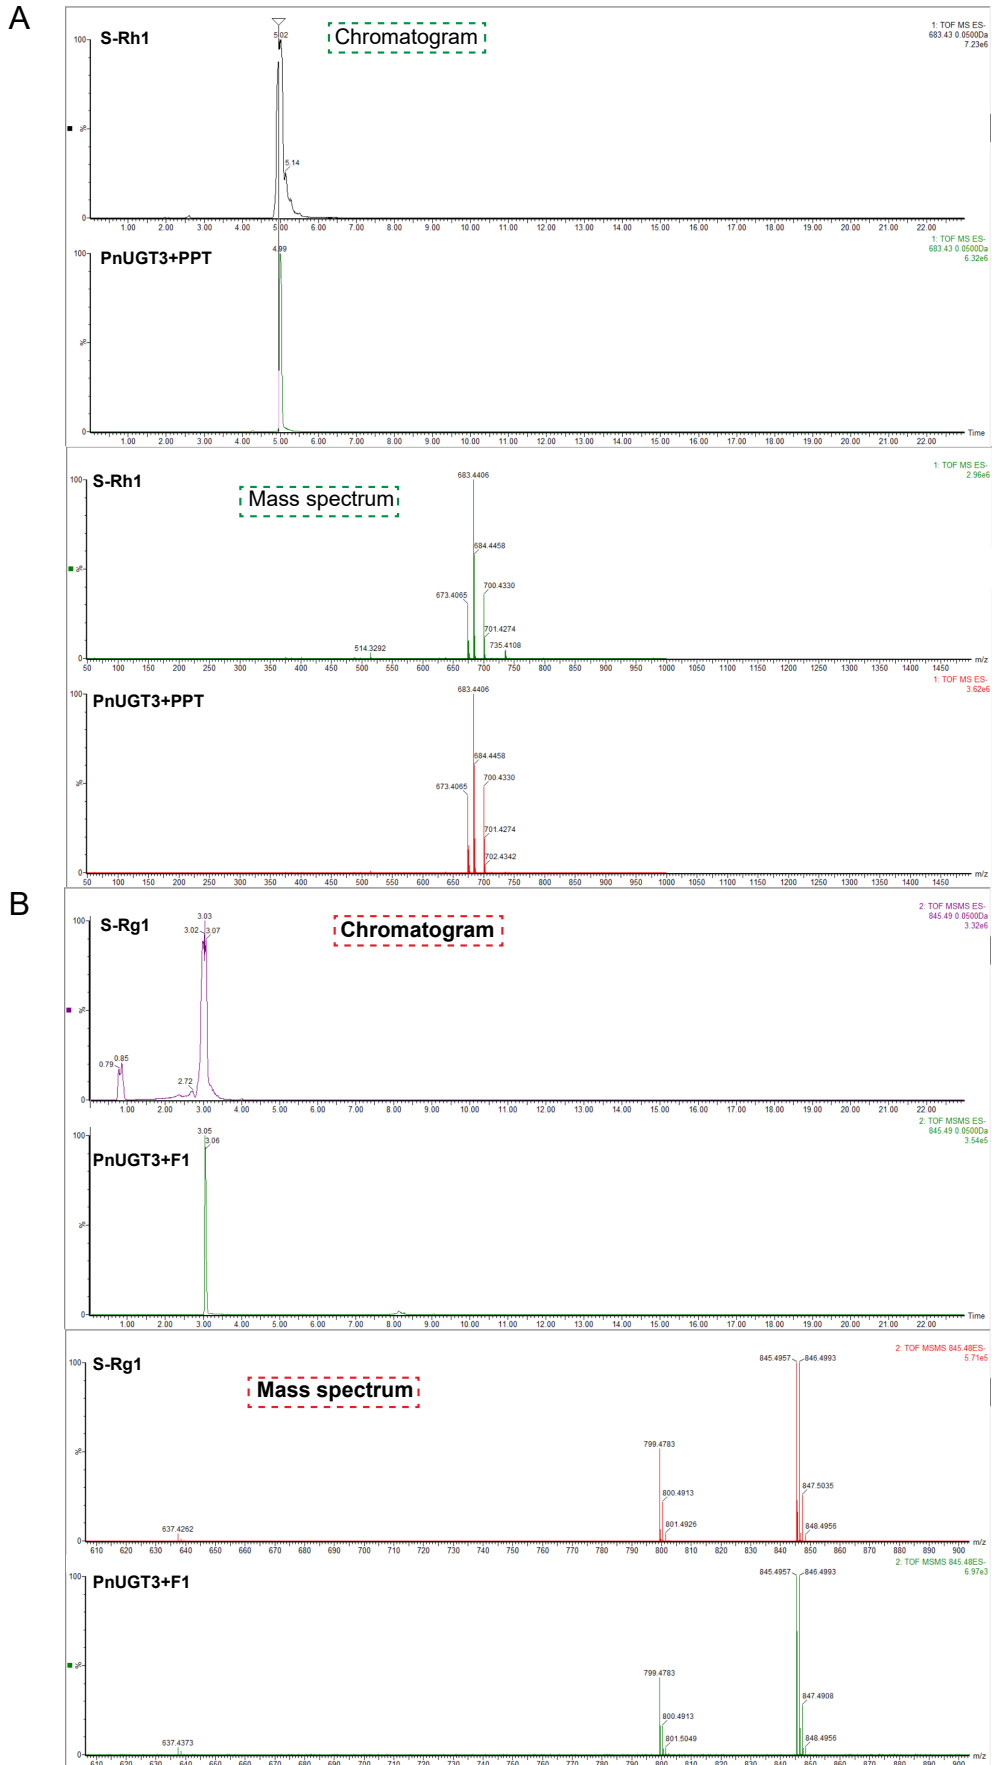

**Supplementary Figure 29. UPLC/Q-TOF analysis results of PnUGT3 protein catalytic reaction. (A) Chromatograms and mass spectrum of ginsenoside Rh1 standard and PnUGT3 catalytic products using PPT as substrate. (B) Chromatograms and mass spectrum of ginsenoside Rg1 standard and PnUGT3 catalytic products using F1 as substrate.**

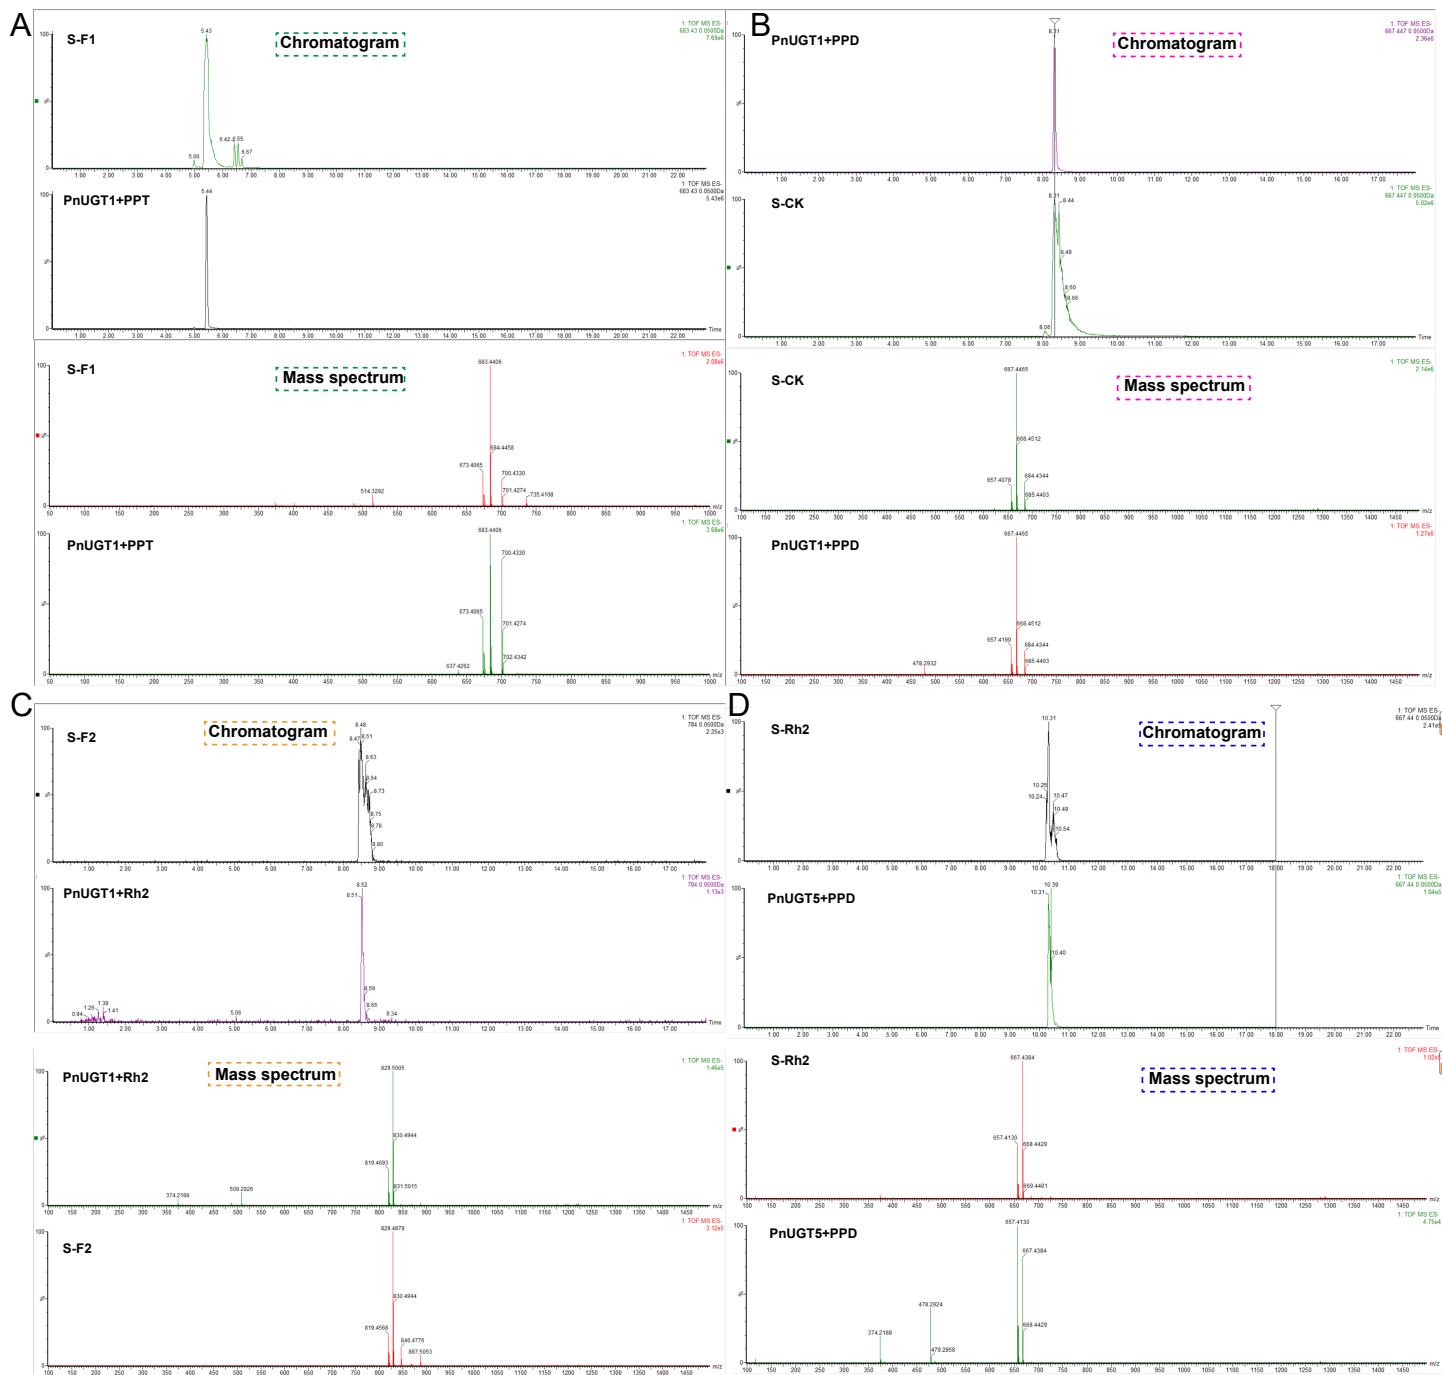

**Supplementary Figure 30. UPLC/Q-TOF analysis results of PnUGT1 and PnUGT5 protein catalytic reaction. (A)** Chromatograms and mass spectrum of ginsenoside F1 standard and PnUGT1 catalytic products using PPT as substrate. **(B)** Chromatograms and mass spectrum of ginsenoside CK standard and PnUGT1 catalytic products using PPD as substrate. **(C)** Chromatograms and mass spectrum of ginsenoside F2 standard and PnUGT1 catalytic products using Rh2 as substrate. **(D)** Chromatograms and mass spectrum of ginsenoside Rh2 standard and PnUGT5 catalytic products using PPD as substrate.

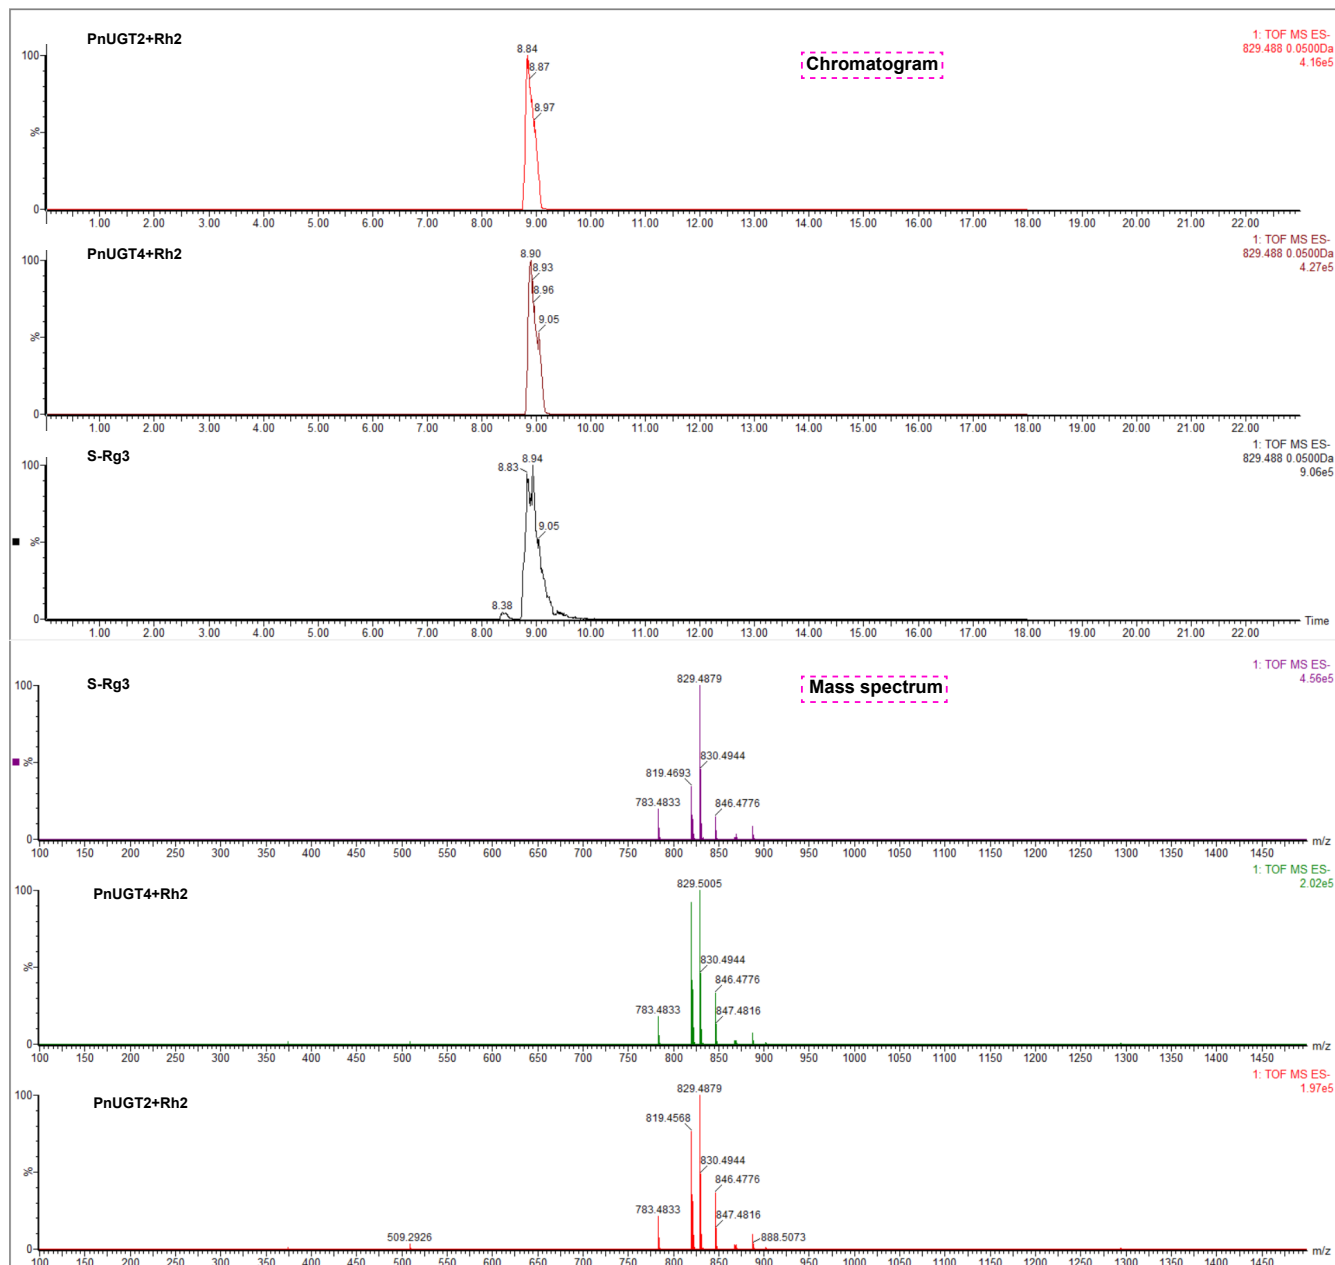

**Supplemental Figure 31. UPLC/Q-TOF analysis results of PnUGT2 and PnUGT4 protein catalytic reaction.** Chromatograms and mass spectrum of ginsenoside Rg3 standard and PnUGT2 and PnUGT4 catalytic products using Rh2 as substrate.

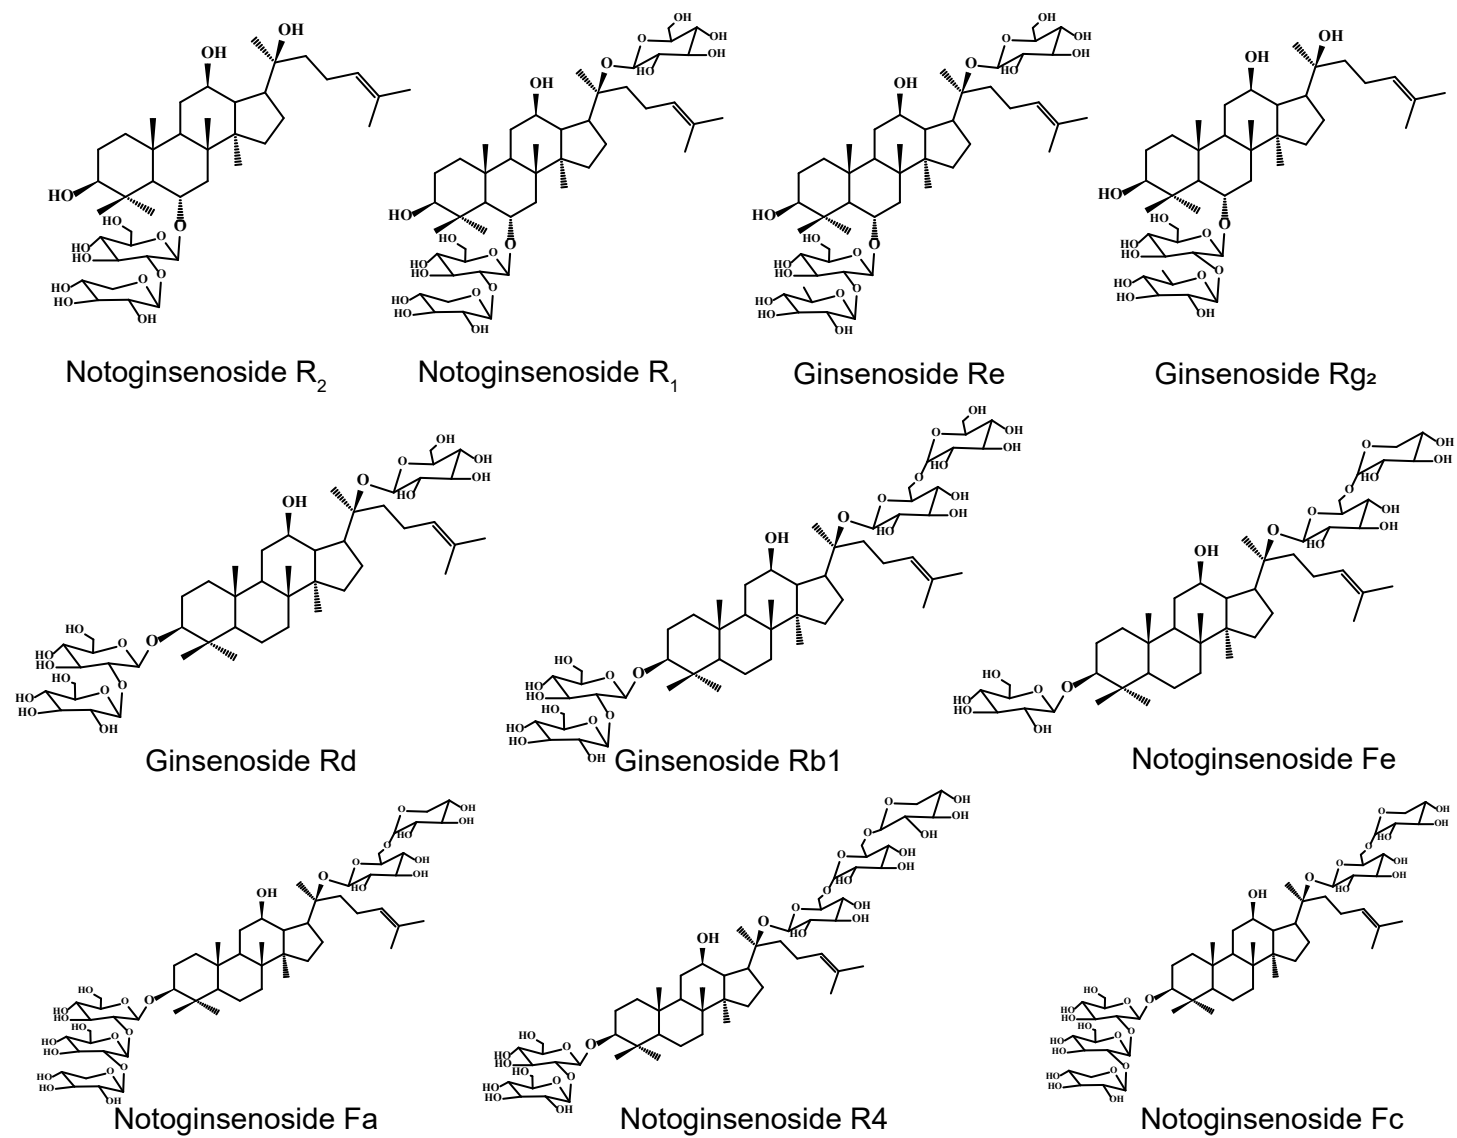

**Supplementary Figure 32. The structural formulas of various saponins in *P. notoginseng*.**



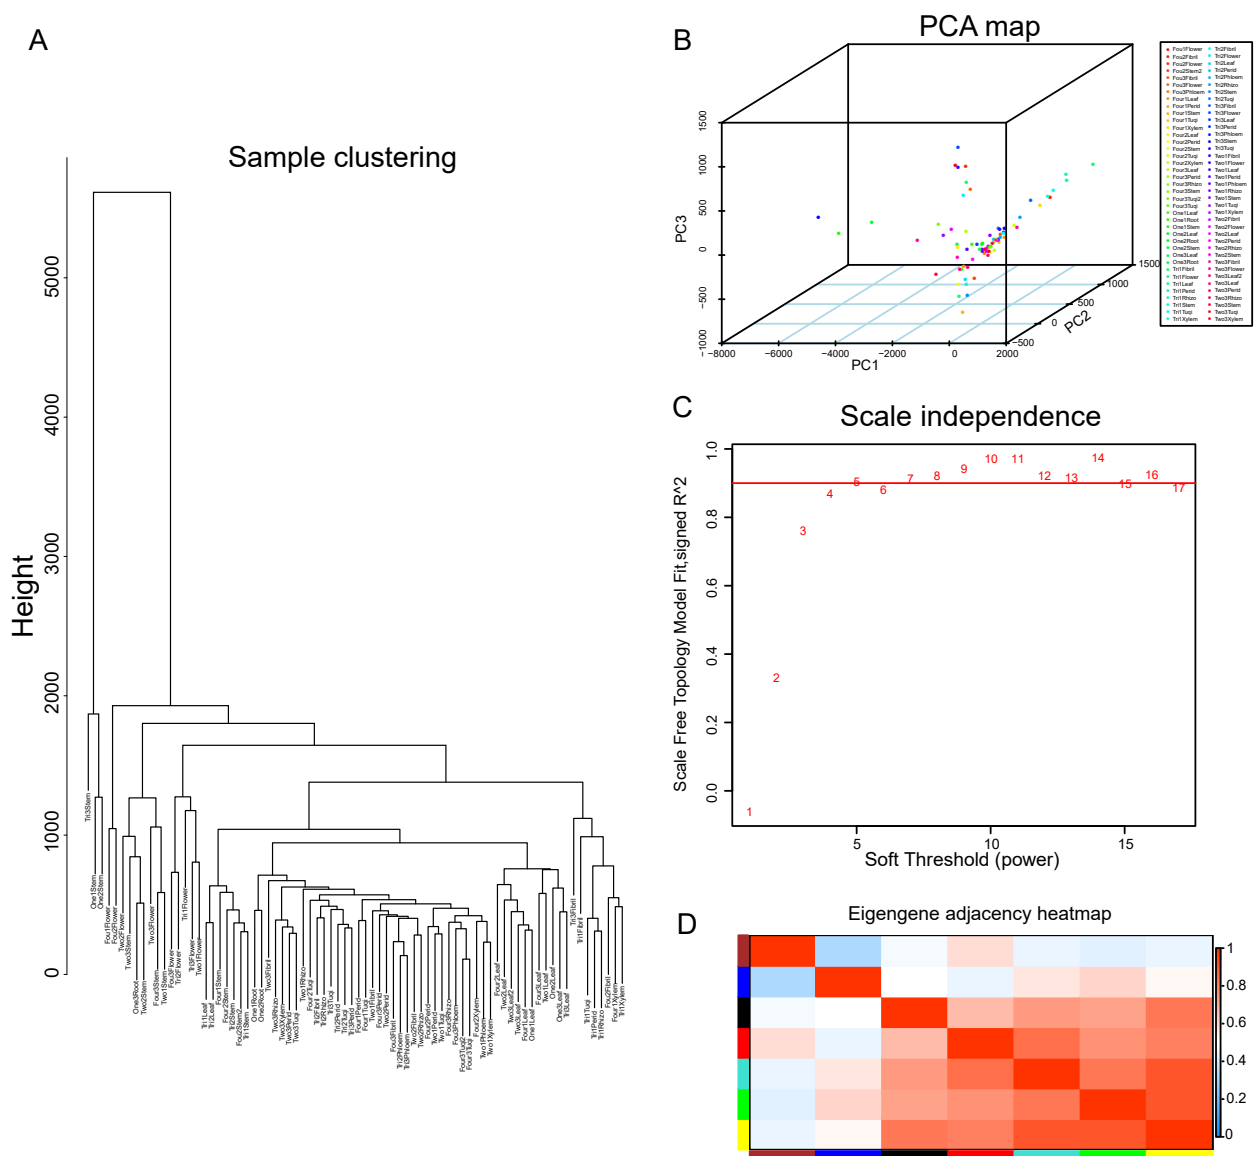

**Supplemental Figure 33. WGCAN analysis and characterization of corresponding data.**

**(A)** Construction of the sample clustering evolutionary tree of transcriptome to screen out outliers.

**(B)** Construction the PCA map of transcriptome samples. **(C)** Analysis of network topology for various soft-thresholding powers. When we set  $R^2=0.9$ , the optimal candidate threshold to reach this height is 10.

**(D)** Visualization of the eigengene network representing the relationships among the modules. The redder the color in the heat map, the stronger the correlation between the two modules.

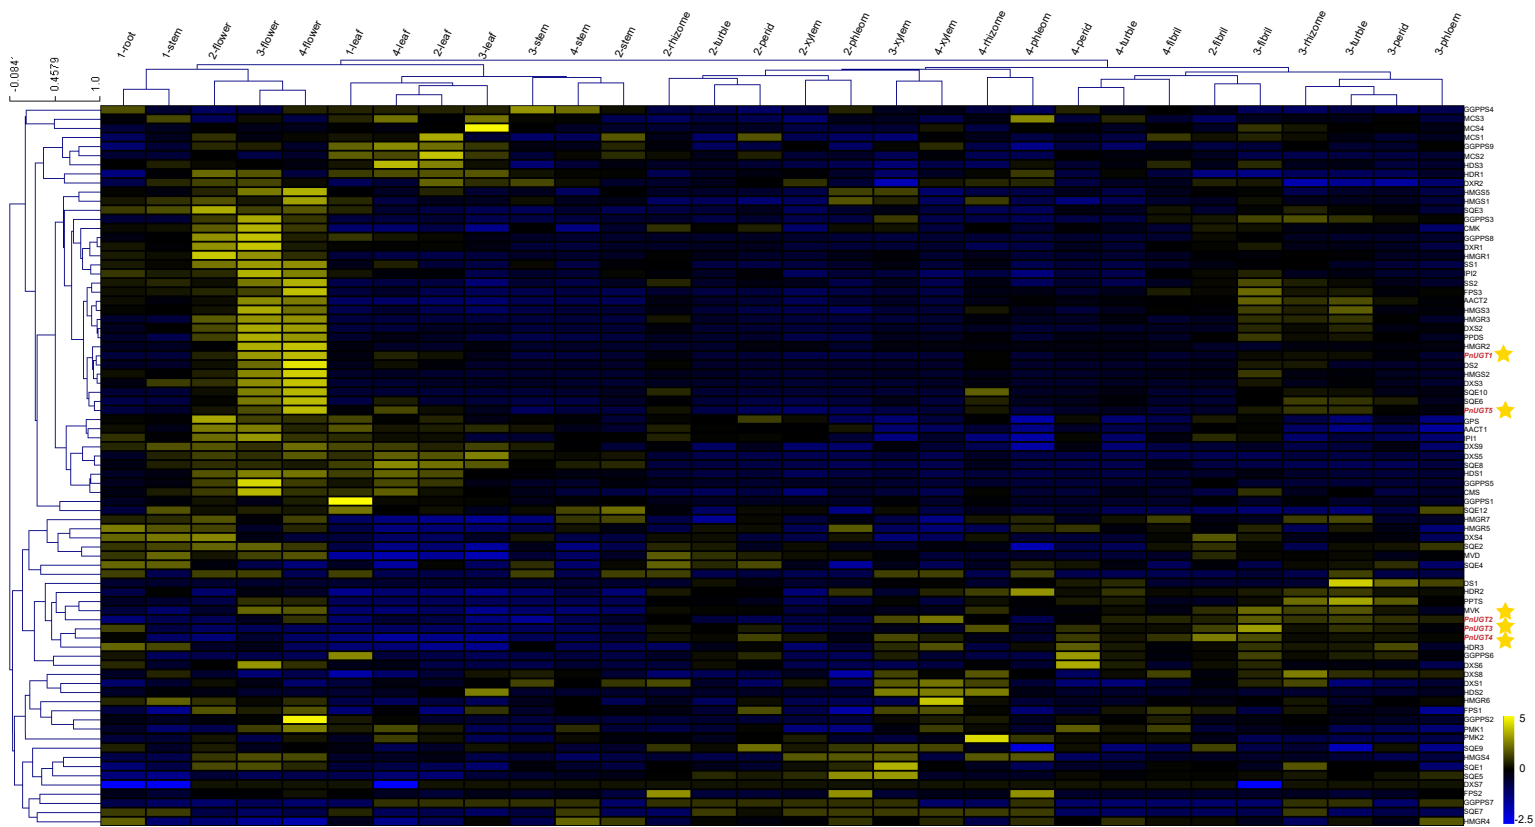

**Supplemental Figure 34. Expression profile of key enzyme genes in saponin biosynthesis pathway.** The right side of the heatmap shows the evolutionary tree of genes, and genes with similar expression patterns are clustered into one group.

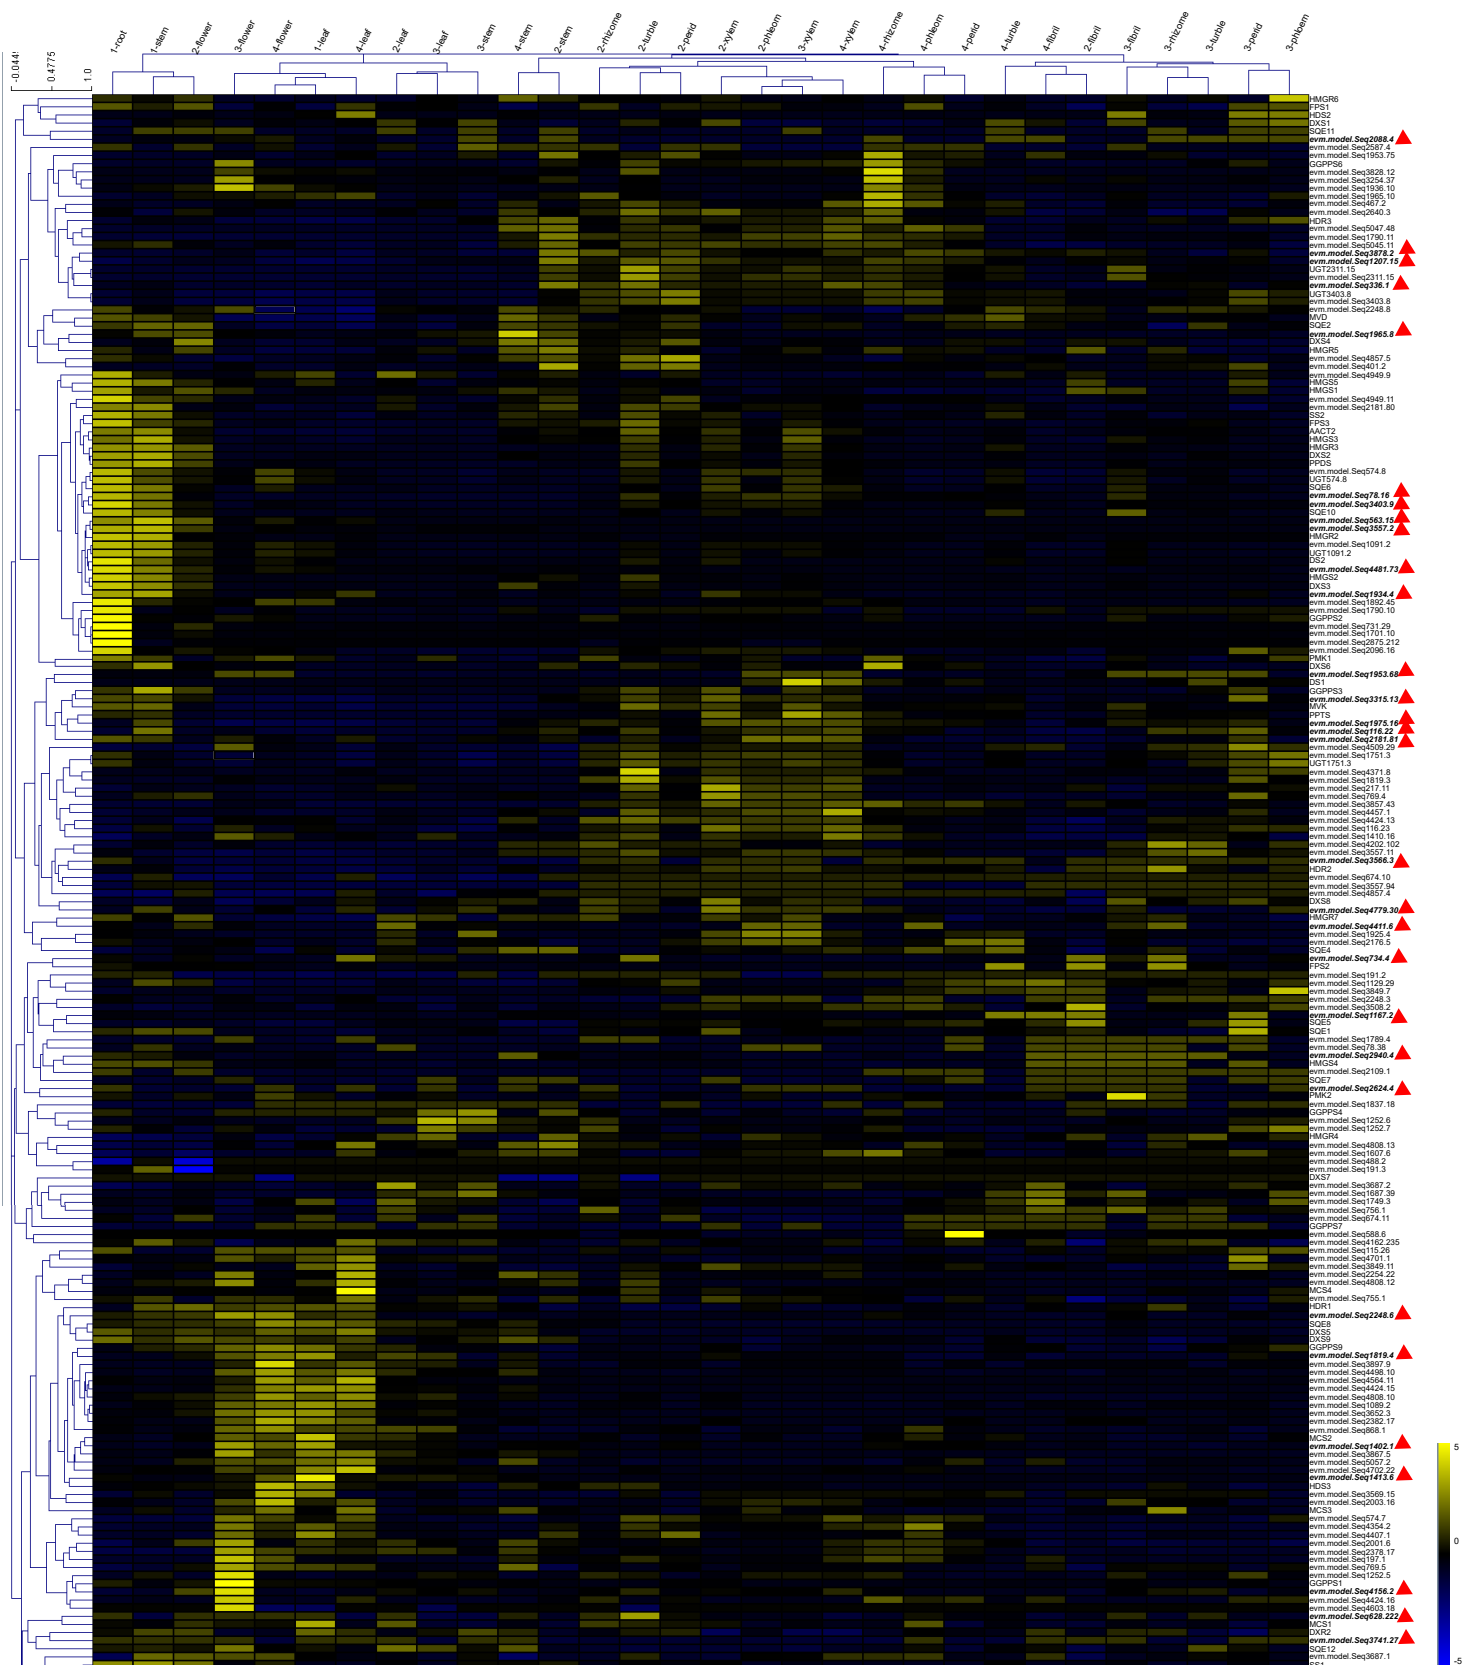

Supplemental Figure 35. Heat map of expression of UGT genes and genes in terpenoid biosynthesis pathway. The right side of the heatmap shows the evolutionary tree of genes, and genes with similar expression patterns are clustered into one group.

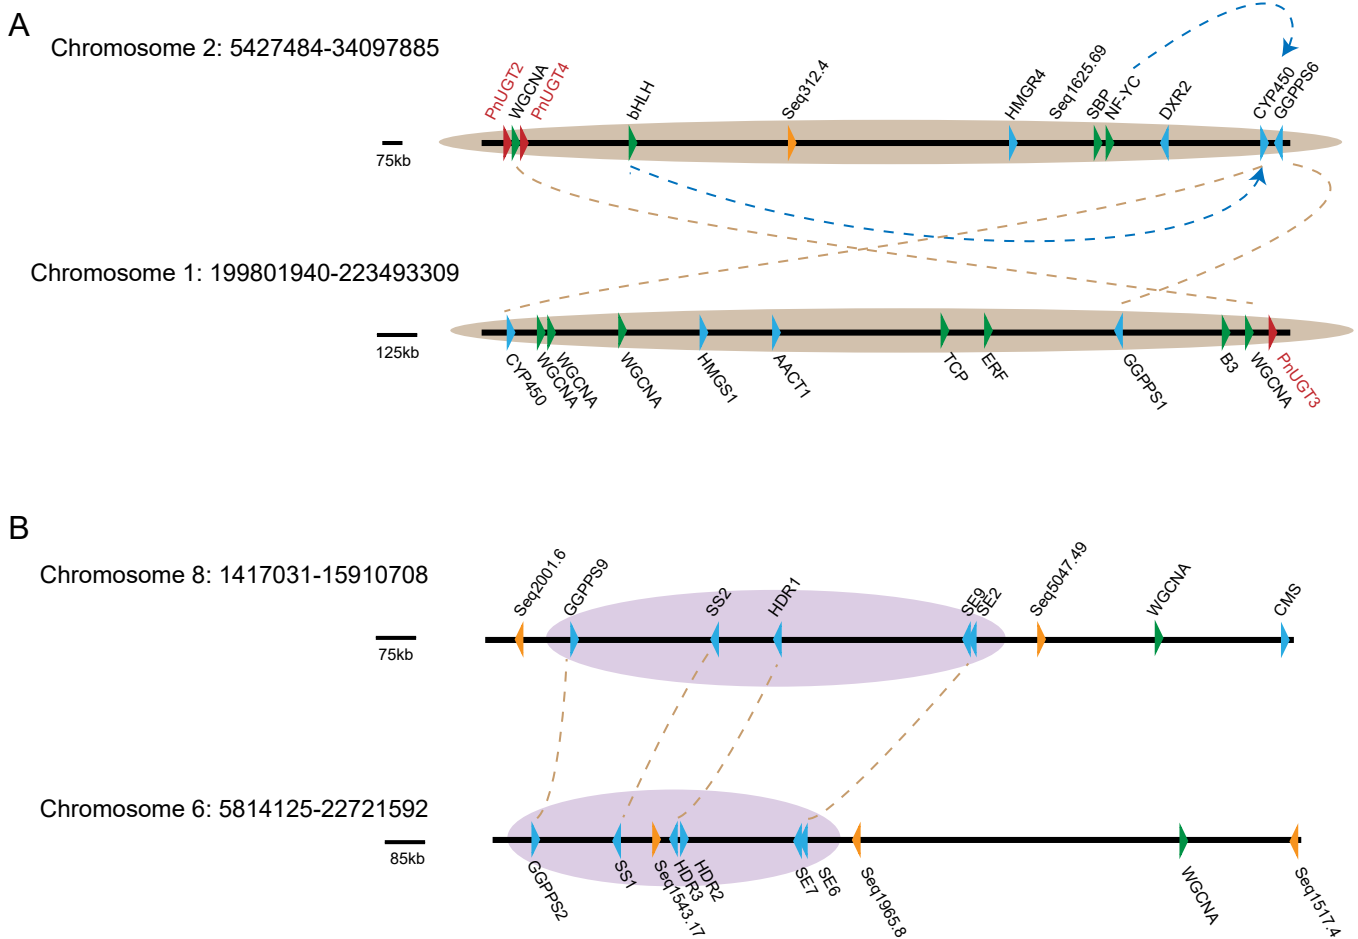

**Supplemental Figure 36. Gene clusters involved in saponins biosynthesis found in *P. notoginseng* genome. (A) Gene clusters on chromosomes 1, 2 and their correspondence. (B) Gene clusters on chromosomes 6, 8 and their correspondence. Orange lines indicate copies of genes with the same function, and blue lines indicate the correlation between transcription factors and pathway genes.**

1167 **Supplementary Tables**

1168

1169 **Supplementary Table 1.** Estimation of genome size of *P. notoginseng* based on *K-mer*  
1170 analysis.

1171

| <b>Version</b>           | <b>V1.0</b>     |
|--------------------------|-----------------|
| Total base (Gb)          | 231.06          |
| <i>K</i>                 | 31              |
| <i>K-mer</i> number      | 136,285,293,064 |
| <i>K-mer</i> depth       | 58              |
| Genome size (Gb)         | 2.38            |
| Revised genome size (Gb) | 2.35            |
| Heterozygous ratio (%)   | 0.58            |
| Repeat (%)               | 69.05           |

1172

1173

1174 **Supplementary Table 2.** Sequencing data statistics of *P. notoginseng*.

1175

| <b>Pair-end libraries</b> | <b>Insert size</b> | <b>Total data (Gb)</b> | <b>Reads length (bp)</b> | <b>Sequence coverage (X)</b> |
|---------------------------|--------------------|------------------------|--------------------------|------------------------------|
| Illumina reads            | 350 bp             | 240.22                 | 150                      | 90.31                        |
| Pacbio reads              | 30 kb              | 284.07                 | -                        | 106.79                       |
| Hi-C                      | -                  | 340.83                 | 150                      | 128.13                       |
| <b>Total</b>              | -                  | <b>865.12</b>          | -                        | <b>325.23</b>                |

1176

1177

1178 **Supplementary Table 3.** The Statistics of Pseudomolecule based on Hi-C technique.  
1179

| <b>Pseudomolecule</b> | <b>Contig Num</b> | <b>Length</b> |
|-----------------------|-------------------|---------------|
| chr1                  | 528               | 295,554,597   |
| chr2                  | 567               | 268,893,176   |
| chr3                  | 412               | 240,203,249   |
| chr4                  | 406               | 234,363,521   |
| chr5                  | 550               | 229,146,523   |
| chr6                  | 584               | 216,472,261   |
| chr7                  | 383               | 216,178,389   |
| chr8                  | 462               | 203,820,015   |
| chr9                  | 500               | 199,351,208   |
| chr10                 | 340               | 194,535,185   |
| chr11                 | 305               | 179,501,441   |
| chr12                 | 279               | 176,575,628   |
| Total anchored        | 5316              | 2,654,595,193 |
| Unanchored            | 44                | 2,772,262     |

1180  
1181

1182 **Supplementary Table 4.** Statistic of DNA base composition in the *P. notoginseng*  
1183 genome.

1184

| <b>Iterms</b> | <b>Number(bp)</b> | <b>Percent (%)</b> |
|---------------|-------------------|--------------------|
| A             | 871,740,949       | 32.76              |
| T             | 871,858,137       | 32.77              |
| C             | 457,971,493       | 17.21              |
| G             | 458,576,639       | 17.24              |
| N             | 530,400           | 0.02               |
| GC            | 916,548,132       | 34.45              |
| Total         | 2,660,147,218     | 100                |

1185

1186



1187 **Supplementary Table 5.** Statistics of consistency assessment of the *P. notoginseng*  
1188 genome.  
1189

| <b>Sample</b>         | <b>PNCCMU201908</b> |
|-----------------------|---------------------|
| Clean Reads           | 668,000,000         |
| Clean Bases           | 100,200,000,000     |
| Mapped Reads          | 666,778,003         |
| Mapped Reads Rate (%) | 99.82               |
| Mapped Bases          | 99,793,880,477      |
| Mapped Bases Rate (%) | 99.59               |
| Mean Depth            | 37.87               |
| Coverage Rate (%)     | 97.97               |

1190  
1191

1192 **Supplementary Table 6.** Assessment the gene coverage rate using BUSCO.

1193

| <b>Items</b>                        | <b>Number</b> | <b>Percent (%)</b> |
|-------------------------------------|---------------|--------------------|
| Complete BUSCOs (C)                 | 2,049         | 96.6               |
| Complete and single-copy BUSCOs (S) | 1,495         | 70.5               |
| Complete and duplicated BUSCOs (D)  | 554           | 26.1               |
| Fragmented BUSCOs (F)               | 23            | 1.1                |
| Missing BUSCOs (M)                  | 49            | 2.3                |
| Total BUSCO groups searched         | 2,121         | 100                |

1194

1195

1196 **Supplementary Table 7.** Annotation of repetitive sequences in the *P. notoginseng*  
1197 genome.

1198

| <b>Type</b>  | <b>Repeat length (bp)</b> | <b>% of genome</b> |
|--------------|---------------------------|--------------------|
| RepeatMasker | 482,030,502               | 18.12              |
| ProteinMask  | 597,728,373               | 22.47              |
| Denovo       | 2,228,207,907             | 83.76              |
| TRF          | 145,037,356               | 5.45               |
| Total        | 2,283,667,181             | 85.85              |

1199

1200

1201 **Supplementary Table 8.** Summary of repetitive sequences in the *P. notoginseng* genome.

1202

| <b>Class</b> | <b>RepeatMasker TEs</b> |                    | <b>RepeatProteinMasker TEs</b> |                    | <b>RepeatModeler TEs</b> |                    | <b>Combined TEs</b> |                    |
|--------------|-------------------------|--------------------|--------------------------------|--------------------|--------------------------|--------------------|---------------------|--------------------|
| <b>Type</b>  | <b>Length(bp)</b>       | <b>% in genome</b> | <b>Length(bp)</b>              | <b>% in genome</b> | <b>Length(bp)</b>        | <b>% in genome</b> | <b>Length(bp)</b>   | <b>% in genome</b> |
| DNA RT       | 16,404,105              | 0.62               | 6,987,822                      | 0.26               | 28,157,924               | 1.06               | 38,999,478          | 1.47               |
| LINE         | 2,256,979               | 0.08               | 998,015                        | 0.04               | 3,718,106                | 0.14               | 6,035,132           | 0.23               |
| SINE         | 3,185                   | 0                  | 0                              | 0                  | 0                        | 0                  | 3,185               | 0                  |
| LTR RT       | 463,294,570             | 17.42              | 525,365,110                    | 19.75              | 1,533,286,234            | 57.64              | 1,566,296,092       | 58.88              |
| Unknown      | 41,143                  | 0                  | 0                              | 0                  | 725,955,721              | 27.29              | 725,996,018         | 27.29              |
| Other        | 1,185,919               | 0.07               | 65,048,999                     | 2.45               | 7,539,129                | 0.28               | 71,825,002          | 2.7                |
| Total        | 482,030,502             | 18.12              | 597,728,373                    | 22.47              | 2,228,207,907            | 83.76              | 2,271,609,517       | 85.39              |

1203

1204 DNA RT: DNA retrotransposons; LINE: long interspersed nuclear elements; SINE: short interspersed nuclear elements; LTR RT: long terminal  
1205 repeat retrotransposons; Unknown: which have been included in the database, but not classified; Other: Which can be classified by RepeatMasker,  
1206 but don't belong to the above categories

1207 **Supplementary Table 9.** Basic statistical results of gene structure prediction of *P.*  
 1208 *notoginseng* genome.  
 1209

| <b>Gene set</b> |                           | <b>Number of proteins</b> | <b>Average gene length (bp)</b> | <b>Average CDS length (bp)</b> | <b>Average exon per gene</b> | <b>Average exon length (bp)</b> | <b>Average intron length (bp)</b> |
|-----------------|---------------------------|---------------------------|---------------------------------|--------------------------------|------------------------------|---------------------------------|-----------------------------------|
| <i>De novo</i>  | Augustus                  | 49,549                    | 4,535.36                        | 1,043.08                       | 4.38                         | 238.04                          | 1,033.62                          |
|                 | Genebank                  | 55,883                    | 4,452.17                        | 1,119.06                       | 5.1                          | 219.37                          | 813.69                            |
| Homolog         | <i>A. thaliana</i>        | 28,931                    | 4379.27                         | 1069.89                        | 4.77                         | 224.13                          | 878.00                            |
|                 | <i>D. carota</i>          | 32,038                    | 4905.04                         | 1074.87                        | 4.74                         | 226.99                          | 1026.40                           |
|                 | <i>P. ginseng</i>         | 43,292                    | 4653.92                         | 1000.35                        | 4.51                         | 222.00                          | 1043.04                           |
|                 | <i>P. notoginseng-pub</i> | 41238                     | 3031.43                         | 960.98                         | 3.76                         | 255.82                          | 752.13                            |
| RNA-seq         | cDNA                      | 58,196                    | 5,834.68                        | 925.12                         | 5.09                         | 351.88                          | 990.1                             |
|                 | EVM                       | 37,606                    | 5059.63                         | 1202.85                        | 5.21                         | 231.00                          | 917.71                            |

1210

1211

1212 **Supplementary Table 10.** Basic statistical results of gene structure prediction of *P.*  
 1213 *notoginseng* and relative species.  
 1214

| Species                   | Number of proteins | Average gene length (bp) | Average CDS length (bp) | Average exon per gene | Average exon length (bp) | Average intron length (bp) |
|---------------------------|--------------------|--------------------------|-------------------------|-----------------------|--------------------------|----------------------------|
| <i>P. notoginseng</i>     | 37,606             | 5059.63                  | 1202.85                 | 5.21                  | 231.00                   | 917.71                     |
| <i>P. ginseng</i>         | 59,352             | 4213.49                  | 1120.12                 | 5.01                  | 223.53                   | 772.23                     |
| <i>D. carota</i>          | 32,112             | 3104.08                  | 1187.75                 | 5.01                  | 237.23                   | 479.28                     |
| <i>A. thaliana</i>        | 27,416             | 1855.01                  | 1209.65                 | 5.08                  | 238.02                   | 159.09                     |
| <i>P. notoginseng-pub</i> | 34,369             | 2705                     | 957                     | 3.80                  | 251.39                   | 622.24                     |

1215  
 1216

1217 **Supplementary Table 11.** Statistical results of gene function annotation of *P.*  
1218 *notoginseng* genome.  
1219

| <b>Database</b> | <b>Count</b> | <b>Percentage (%)</b> |
|-----------------|--------------|-----------------------|
| BLASTP          | 29,662       | 78.88                 |
| BLASTX          | 29,510       | 78.47                 |
| GO              | 29,931       | 79.59                 |
| KO              | 11,657       | 31.00                 |
| Map             | 7,459        | 19.83                 |
| NR              | 35,926       | 95.53                 |
| NT              | 26,037       | 69.24                 |
| PFAM            | 28,457       | 75.67                 |
| eggNOG          | 25,058       | 66.63                 |
| Total_anno      | 36,154       | 96.14                 |
| Total_unigene   | 37,606       | 100                   |

1220  
1221

1222 **Supplementary Table 12.** Statistical results of non-coding RNA of *P. notoginseng*  
1223 genome.

1224

| <b>Class</b> | <b>Type</b> | <b>Copy</b> | <b>Average length (bp)</b> | <b>Total length (bp)</b> | <b>% of genome</b> |
|--------------|-------------|-------------|----------------------------|--------------------------|--------------------|
| miRNA        | miRNA       | 14430       | 235.19                     | 3393818                  | 0.12758            |
| tRNA         | tRNA        | 1513        | 73.99                      | 111954                   | 0.00421            |
|              | 18S         | 165         | 867.15                     | 143079                   | 0.00538            |
| rRNA         | 28S         | 314         | 136.11                     | 42737                    | 0.00161            |
|              | 5.8S        | 80          | 148.46                     | 11877                    | 0.00045            |
|              | 5S          | 2459        | 118.23                     | 290726                   | 0.01093            |
|              | CD-box      | 7216        | 105.46                     | 760992                   | 0.02861            |
| snRNA        | HACA-box    | 272         | 146.74                     | 39913                    | 0.0015             |
|              | splicing    | 686         | 154.29                     | 105842                   | 0.00398            |

1225

1226



1227 **Supplementary Table 13.** The Statistics of gene clustering to gene families in various  
1228 species.  
1229

| <b>Species</b>        | <b>Genes<br/>number</b> | <b>Genes in<br/>families</b> | <b>Unclustered<br/>genes</b> | <b>Family<br/>number</b> | <b>Unique<br/>families</b> | <b>Average genes<br/>per family</b> |
|-----------------------|-------------------------|------------------------------|------------------------------|--------------------------|----------------------------|-------------------------------------|
| <i>P. ginseng</i>     | 59,352                  | 45,808                       | 13,544                       | 17,112                   | 1,658                      | 2.68                                |
| <i>D. carota</i>      | 32,113                  | 26,151                       | 5,962                        | 13,697                   | 972                        | 1.91                                |
| <i>V. vinifera</i>    | 31,845                  | 23,639                       | 8,206                        | 13,987                   | 936                        | 1.69                                |
| <i>C. annuum</i>      | 35,884                  | 28,781                       | 7,103                        | 13,172                   | 1,243                      | 2.19                                |
| <i>G. uralensis</i>   | 34,445                  | 23,729                       | 10,716                       | 13,597                   | 1,029                      | 1.75                                |
| <i>A. thaliana</i>    | 27,416                  | 23,374                       | 4,042                        | 12,739                   | 777                        | 1.83                                |
| <i>O. sativa</i>      | 42,189                  | 30,038                       | 12,151                       | 13,183                   | 2,239                      | 2.28                                |
| <i>P. notoginseng</i> | 37,525                  | 30,874                       | 6,651                        | 15,655                   | 1,059                      | 1.97                                |

1230

1231

1232  
1233  
1234

**Supplementary Table 14.** Enriched GO terms of genes in *P. notoginseng*-specific families.

| Accession  | Ontology | Term name                                         | p-value  | FDR      |
|------------|----------|---------------------------------------------------|----------|----------|
| GO:0042256 | BP       | mature ribosome assembly                          | 8.69E-12 | 6.55E-09 |
| GO:1901566 | BP       | organonitrogen compound biosynthetic process      | 8.65E-12 | 6.55E-09 |
| GO:0034622 | BP       | cellular macromolecular complex assembly          | 3.60E-12 | 6.55E-09 |
| GO:0065003 | BP       | macromolecular complex assembly                   | 3.02E-11 | 1.71E-08 |
| GO:0009260 | BP       | ribonucleotide biosynthetic process               | 8.70E-11 | 2.81E-08 |
| GO:0009156 | BP       | ribonucleoside monophosphate biosynthetic process | 6.66E-11 | 2.81E-08 |
| GO:0046390 | BP       | ribose phosphate biosynthetic process             | 8.70E-11 | 2.81E-08 |
| GO:0042255 | BP       | ribosome assembly                                 | 1.15E-10 | 3.26E-08 |
| GO:0009124 | BP       | nucleoside monophosphate biosynthetic process     | 1.35E-10 | 3.39E-08 |
| GO:0043933 | BP       | macromolecular complex subunit organization       | 1.78E-10 | 4.03E-08 |
| GO:0044445 | CC       | cytosolic part                                    | 4.10E-12 | 1.66E-09 |
| GO:0022626 | CC       | cytosolic ribosome                                | 1.56E-10 | 3.16E-08 |
| GO:0044391 | CC       | ribosomal subunit                                 | 4.19E-10 | 5.66E-08 |
| GO:0022625 | CC       | cytosolic large ribosomal subunit                 | 8.47E-10 | 8.58E-08 |
| GO:0005829 | CC       | cytosol                                           | 2.56E-09 | 2.08E-07 |
| GO:0032991 | CC       | macromolecular complex                            | 9.62E-09 | 6.49E-07 |
| GO:0005774 | CC       | vacuolar membrane                                 | 1.40E-08 | 8.11E-07 |
| GO:0044437 | CC       | vacuolar part                                     | 2.61E-08 | 1.32E-06 |
| GO:0098805 | CC       | whole membrane                                    | 6.13E-08 | 2.76E-06 |
| GO:1990904 | CC       | ribonucleoprotein complex                         | 3.78E-07 | 1.39E-05 |
| GO:0036094 | MF       | small molecule binding                            | 1.97E-13 | 1.15E-10 |
| GO:0000166 | MF       | nucleotide binding                                | 9.22E-13 | 1.15E-10 |
| GO:0032559 | MF       | adenyl ribonucleotide binding                     | 5.37E-13 | 1.15E-10 |
| GO:0043168 | MF       | anion binding                                     | 2.64E-13 | 1.15E-10 |
| GO:0005524 | MF       | ATP binding                                       | 4.75E-13 | 1.15E-10 |
| GO:0032553 | MF       | ribonucleotide binding                            | 1.11E-12 | 1.15E-10 |
| GO:0008144 | MF       | drug binding                                      | 1.03E-12 | 1.15E-10 |
| GO:0030554 | MF       | adenyl nucleotide binding                         | 6.48E-13 | 1.15E-10 |
| GO:0097367 | MF       | carbohydrate derivative binding                   | 1.21E-12 | 1.15E-10 |
| GO:1901265 | MF       | nucleoside phosphate binding                      | 9.22E-13 | 1.15E-10 |

1235  
1236  
1237

**Supplementary Table 15.** Enriched GO terms of genes in expanded gene families.

| Accession  | Ontology | Term name                                                                                                                                                     | FDR      |
|------------|----------|---------------------------------------------------------------------------------------------------------------------------------------------------------------|----------|
| GO:0006313 | BP       | transposition, DNA-mediated                                                                                                                                   | 1.32E-60 |
| GO:0032196 | BP       | transposition                                                                                                                                                 | 8.91E-49 |
| GO:0006636 | BP       | unsaturated fatty acid biosynthetic process                                                                                                                   | 1.41E-45 |
| GO:0033559 | BP       | unsaturated fatty acid metabolic process                                                                                                                      | 5.30E-45 |
| GO:0006310 | BP       | DNA recombination                                                                                                                                             | 1.96E-18 |
| GO:0022900 | BP       | electron transport chain                                                                                                                                      | 7.47E-12 |
| GO:0006633 | BP       | fatty acid biosynthetic process                                                                                                                               | 8.70E-12 |
| GO:0019684 | BP       | photosynthesis, light reaction                                                                                                                                | 1.62E-09 |
| GO:0072330 | BP       | monocarboxylic acid biosynthetic process                                                                                                                      | 5.02E-09 |
| GO:0042773 | BP       | ATP synthesis coupled electron transport                                                                                                                      | 1.57E-08 |
| GO:0070469 | CC       | respiratory chain                                                                                                                                             | 1.53E-10 |
| GO:0031224 | CC       | intrinsic component of membrane                                                                                                                               | 1.56E-06 |
| GO:0016021 | CC       | integral component of membrane                                                                                                                                | 1.61E-06 |
| GO:0031966 | CC       | mitochondrial membrane                                                                                                                                        | 2.59E-06 |
| GO:0031897 | CC       | Tic complex                                                                                                                                                   | 2.72E-05 |
| GO:0005743 | CC       | mitochondrial inner membrane                                                                                                                                  | 3.62E-05 |
| GO:0019822 | CC       | P4 peroxisome                                                                                                                                                 | 9.83E-05 |
| GO:0044425 | CC       | membrane part                                                                                                                                                 | 0.000117 |
| GO:0005739 | CC       | mitochondrion                                                                                                                                                 | 0.000153 |
| GO:0000799 | CC       | nuclear condensin complex                                                                                                                                     | 0.000217 |
| GO:0004803 | MF       | transposase activity                                                                                                                                          | 4.81E-61 |
| GO:0016717 | MF       | oxidoreductase activity, acting on paired donors, with oxidation of a pair of donors resulting in the reduction of molecular oxygen to two molecules of water | 1.29E-51 |
| GO:0102985 | MF       | Delta12-fatty-acid desaturase activity                                                                                                                        | 1.08E-40 |
| GO:0008234 | MF       | cysteine-type peptidase activity                                                                                                                              | 8.78E-27 |
| GO:0008270 | MF       | zinc ion binding                                                                                                                                              | 9.82E-23 |
| GO:0019863 | MF       | IgE binding                                                                                                                                                   | 3.20E-18 |
| GO:0019865 | MF       | immunoglobulin binding                                                                                                                                        | 3.20E-18 |
| GO:0140097 | MF       | catalytic activity, acting on DNA                                                                                                                             | 2.89E-15 |
| GO:0008483 | MF       | transaminase activity                                                                                                                                         | 1.96E-13 |
| GO:0016769 | MF       | transferase activity, transferring nitrogenous groups                                                                                                         | 1.96E-13 |

1238  
1239

1240

**Supplementary Table 16.** Enriched GO terms of genes in contracted gene families.

1241

| Accession  | Ontology | Term name                                          | FDR         |
|------------|----------|----------------------------------------------------|-------------|
| GO:0006468 | BP       | protein phosphorylation                            | 2.63404E-66 |
| GO:0016310 | BP       | phosphorylation                                    | 1.3388E-65  |
| GO:0006796 | BP       | phosphate-containing compound<br>metabolic process | 5.17223E-36 |
| GO:0006793 | BP       | phosphorus metabolic process                       | 6.21129E-36 |
| GO:0006464 | BP       | cellular protein modification process              | 1.40587E-24 |
| GO:0036211 | BP       | protein modification process                       | 1.40587E-24 |
| GO:0005975 | BP       | carbohydrate metabolic process                     | 6.30804E-24 |
| GO:0051274 | BP       | beta-glucan biosynthetic process                   | 3.40873E-23 |
| GO:0051273 | BP       | beta-glucan metabolic process                      | 9.58801E-23 |
| GO:0048544 | BP       | recognition of pollen                              | 7.66426E-21 |
| GO:0005886 | CC       | plasma membrane                                    | 1.35E-59    |
| GO:0031224 | CC       | intrinsic component of membrane                    | 2.26E-36    |
| GO:0016021 | CC       | integral component of membrane                     | 2.27E-36    |
| GO:0016020 | CC       | membrane                                           | 5.87E-33    |
| GO:0044425 | CC       | membrane part                                      | 2.47E-28    |
| GO:0009341 | CC       | beta-galactosidase complex                         | 8.93E-13    |
| GO:0005576 | CC       | extracellular region                               | 3.69E-11    |
| GO:0016459 | CC       | myosin complex                                     | 3.69E-11    |
| GO:0044459 | CC       | plasma membrane part                               | 6.17481E-10 |
| GO:0000148 | CC       | 1,3-beta-D-glucan synthase complex                 | 1.82574E-08 |
| GO:0017076 | MF       | purine nucleotide binding                          | 7.86457E-88 |
| GO:0032555 | MF       | purine ribonucleotide binding                      | 7.86457E-88 |
| GO:0035639 | MF       | purine ribonucleoside triphosphate<br>binding      | 9.1967E-88  |
| GO:0032553 | MF       | ribonucleotide binding                             | 4.82089E-87 |
| GO:0008144 | MF       | drug binding                                       | 5.31098E-86 |
| GO:0097367 | MF       | carbohydrate derivative binding                    | 4.96901E-85 |
| GO:0032559 | MF       | adenyl ribonucleotide binding                      | 4.96901E-85 |
| GO:0030554 | MF       | adenyl nucleotide binding                          | 8.50134E-85 |
| GO:0005524 | MF       | ATP binding                                        | 1.24308E-84 |
| GO:0043168 | MF       | anion binding                                      | 8.90045E-80 |

1242

1243

1244 **Supplementary Table 17.** Copy number variation of genes involved in the ginsenoside  
 1245 biosynthesis in the *P. notoginseng* and seven other plant species.

1246

| Gene   | PN  | PG  | DC  | CA  | VV  | GU  | AT  | OS  |
|--------|-----|-----|-----|-----|-----|-----|-----|-----|
| AACT   | 2   | 4   | 2   | 2   | 2   | 3   | 2   | 2   |
| HMGS   | 5   | 8   | 1   | 6   | 7   | 3   | 1   | 3   |
| HMGR   | 7   | 17  | 3   | 10  | 3   | 4   | 2   | 3   |
| MVK    | 1   | 2   | 1   | 1   | 1   | 1   | 1   | 1   |
| PMK    | 2   | 4   | 2   | 0   | 1   | 2   | 0   | 1   |
| MVD    | 1   | 2   | 1   | 2   | 1   | 1   | 2   | 2   |
| DXS    | 9   | 13  | 5   | 3   | 8   | 5   | 3   | 3   |
| DXR    | 2   | 4   | 1   | 1   | 1   | 3   | 1   | 1   |
| CMS    | 1   | 2   | 2   | 1   | 1   | 1   | 1   | 1   |
| CMK    | 1   | 2   | 1   | 1   | 1   | 1   | 1   | 1   |
| MCS    | 4   | 4   | 1   | 1   | 1   | 1   | 1   | 1   |
| HDS    | 3   | 4   | 2   | 1   | 1   | 1   | 1   | 1   |
| HDR    | 3   | 6   | 3   | 3   | 1   | 1   | 1   | 2   |
| IDI    | 2   | 3   | 1   | 3   | 2   | 0   | 2   | 2   |
| GPS    | 1   | 2   | 1   | 1   | 1   | 2   | 1   | 2   |
| FPS    | 3   | 5   | 1   | 2   | 1   | 1   | 2   | 5   |
| GGPS   | 9   | 16  | 7   | 5   | 3   | 3   | 12  | 3   |
| SS     | 2   | 4   | 1   | 2   | 1   | 2   | 2   | 2   |
| SQE    | 12  | 25  | 7   | 7   | 8   | 8   | 9   | 4   |
| DS     | 2   | 4   | 1   | 1   | 2   | 1   | 1   | 1   |
| CYP450 | 336 | 482 | 311 | 480 | 410 | 257 | 248 | 360 |
| GT     | 158 | 222 | 117 | 4   | 228 | 91  | 112 | 193 |
| Total  | 566 | 835 | 472 | 537 | 685 | 392 | 406 | 594 |

1247 PN: *P. notoginseng*; PG: *P. ginseng*; DC: *D. carota*; CA: *C. annuum*; VV: *V. vinifera*;  
 1248 GU: *G. uralensis*; AT: *A. thaliana*; OS: *O. sativa*

1249

1250 **Supplementary Table 18.** *Ks* values and duplication times of genes involved in  
 1251 ginsenoside biosynthesis in *P. notoginseng*.

1252

| <b>GENE</b> | <b>Paralog1</b> | <b>Paralog2</b> | <b><i>Ka</i></b> | <b><i>Ks</i></b> | <b>MYA</b> |
|-------------|-----------------|-----------------|------------------|------------------|------------|
| AACT        | Seq3227.16      | Seq4366.20      | 0.1              | 1.4065           | 108.2      |
| DS          | Seq60.43        | Seq2181.91      | 0.1218           | 0.608            | 46.8       |
| DXR         | Seq3336.90      | Seq4886.4       | 0.0477           | 0.3082           | 23.7       |
| DXS         | Seq1892.29      | Seq3392.7       | 0.1258           | 0.4184           | 32.2       |
| DXS         | Seq125.2        | Seq2176.8       | 2.0513           | 0.4374           | 33.6       |
| DXS         | Seq125.2        | Seq2599.2       | 2.0513           | 0.4374           | 33.6       |
| DXS         | Seq4710.4       | Seq4702.20      | 0.0005           | 0.464            | 35.7       |
| DXS         | Seq1892.29      | Seq3331.15      | 0.0541           | 0.5084           | 39.1       |
| FPS         | Seq4090.9       | Seq4036.46      | 0.2527           | 0.421            | 32.4       |
| GGPPS       | Seq3857.39      | Seq1249.12      | 0.0964           | 0.402            | 30.9       |
| GGPPS       | Seq2027.16      | Seq3857.39      | 0.1699           | 1.6357           | 125.8      |
| HDR         | Seq580.1        | Seq1543.10      | 0.0722           | 0.4323           | 33.3       |
| HDS         | Seq1699.17      | Seq3612.118     | 0.0246           | 0.2446           | 18.8       |
| HMGR        | Seq1207.10      | Seq2093.13      | 0.0239           | 0.3989           | 30.7       |
| HMGS        | Seq1609.4       | Seq2103.7       | 0.0185           | 0.3479           | 26.8       |
| HMGS        | Seq3714.31      | Seq1609.4       | 0.0488           | 1.4359           | 110.5      |
| IPI         | Seq4782.43      | Seq4782.31      | 0.0277           | 0.0417           | 3.2        |
| MCS         | Seq311.72       | Seq527.2        | 0.0731           | 0.5548           | 42.7       |
| PMK         | Seq1071.3       | Seq2875.187     | 0.2405           | 0.3632           | 27.9       |
| SQE         | Seq734.26       | Seq2337.9       | 0.0447           | 0.5602           | 43.1       |
| SQE         | Seq734.26       | Seq3238.6       | 0.1236           | 1.5512           | 119.3      |
| SS          | Seq1220.5       | Seq5026.3       | 0.0469           | 0.197            | 15.2       |
| UGT         | Seq1751.3       | Seq3403.8       | 0.0454           | 0.0872           | 6.7        |
| UGT         | Seq2311.15      | Seq1091.2       | 0.064            | 0.1306           | 10         |

1253

1254

1255 **Supplementary Table 22.** Representative genes which are highly expressed in tubercle  
 1256 group.

1257

| <b>Gene ID</b> | <b>P value</b> | <b>Annotation description</b>     | <b>GO terms</b>                                                                                                                                                                              |
|----------------|----------------|-----------------------------------|----------------------------------------------------------------------------------------------------------------------------------------------------------------------------------------------|
| Seq1082.27     | 5.9E-06        | carotenoid cleavage dioxygenase 7 | GO:0016121 carotene catabolic process;<br>GO:0010223 secondary shoot formation;<br>GO:1901601 strigolactone biosynthetic process;                                                            |
| Seq4384.8      | 0.0002419      | carotenoid cleavage dioxygenase 8 | GO:0016121 carotene catabolic process;<br>GO:0010223 secondary shoot formation;<br>GO:1901601 strigolactone biosynthetic process;                                                            |
| Seq2249.10     | 0.013745       | Cytokinin hydroxylase             | GO:0033466 trans-zeatin biosynthetic process;                                                                                                                                                |
| Seq2362.18     | 0.013745       | Cytokinin dehydrogenase 6         | GO:0009690 cytokinin metabolic process;<br>GO:0010103 stomatal complex morphogenesis;                                                                                                        |
| Seq4266.75     | 0.002591       | Expansin-A4                       | GO:0009664 plant-type cell wall organization;                                                                                                                                                |
| Seq1722.34     | 0.001241       | Protein WALLS ARE THIN 1          | GO:0006949 syncytium formation;<br>GO:0009851 auxin biosynthetic process;<br>GO:0010315 auxin efflux;<br>GO:0009734 auxin-activated signaling pathway;<br>GO:0071555 cell wall organization; |

1258

1259

1260  
1261

**Supplementary Table 23.** Statistics of transcription factors in *P. notoginseng* genome.

| <b>TF family</b> | <b>Gene copy number</b> |
|------------------|-------------------------|
| bHLH             | 188                     |
| ERF              | 175                     |
| NAC              | 141                     |
| MYB              | 128                     |
| C2H2             | 114                     |
| MYB_related      | 105                     |
| bZIP             | 91                      |
| GRAS             | 91                      |
| WRKY             | 90                      |
| G2-like          | 72                      |
| HD-ZIP           | 71                      |
| C3H              | 57                      |
| LBD              | 57                      |
| Trihelix         | 57                      |
| FAR1             | 52                      |
| B3               | 49                      |
| AP2              | 40                      |
| Dof              | 40                      |
| ARF              | 34                      |
| GATA             | 33                      |
| SBP              | 33                      |
| TCP              | 33                      |
| M-type_MADS      | 28                      |
| HSF              | 25                      |
| TALE             | 25                      |
| NF-YB            | 21                      |
| HB-other         | 19                      |
| NF-YC            | 19                      |
| WOX              | 18                      |
| MIKC_MADS        | 17                      |
| Nin-like         | 17                      |
| GRF              | 15                      |
| NF-YA            | 15                      |
| ZF-HD            | 15                      |
| GeBP             | 14                      |
| BES1             | 13                      |
| DBB              | 13                      |
| E2F/DP           | 13                      |
| BBR-BPC          | 12                      |
| CO-like          | 12                      |
| CPP              | 12                      |



---

|           |      |
|-----------|------|
| CAMTA     | 11   |
| ARR-B     | 10   |
| YABBY     | 10   |
| HRT-like  | 8    |
| SRS       | 7    |
| EIL       | 6    |
| LSD       | 5    |
| RAV       | 5    |
| STAT      | 3    |
| HB-PHD    | 2    |
| LFY       | 2    |
| NF-X1     | 2    |
| S1Fa-like | 2    |
| Whirly    | 2    |
| SAP       | 1    |
| VOZ       | 1    |
| Total     | 2150 |

---

1262

1263

1264 **Supplementary Table 25.** The CYP450 genes used to construct phylogenetic tree in  
 1265 this research.  
 1266

| Subfamily | Gene name      | Genbank number | Reference                 |
|-----------|----------------|----------------|---------------------------|
| CYP51     | CYP51G1        | DQ335779.1     | (Li et al., 2007)         |
|           | CYP51H10       | DQ680852.1     | (Qi et al., 2006)         |
| CYP710    | CYP710A1       | NM_129002.3    | (Lin et al., 1999)        |
|           | CYP710A4       | NM_128445.3    | (Lin et al., 1999)        |
|           | CYP710A2       | NM_129001.3    | (Lin et al., 1999)        |
| CYP711    | MAX1(CYP711A1) | NM_179743.2    | (Lin et al., 1999)        |
| CYP74     | CYP74A51       | LC063857.1     | unpublished               |
|           | CYP74B24       | LC063856.1     | unpublished               |
| CYP97     | CYP97A3        | NM_102914.3    | (Theologis et al., 2000)  |
|           | CYP97C11       | EU849604.1     | (Stigliani et al., 2011)  |
|           | CYP97B3        | NM_117600.6    | (Mayer et al., 1999)      |
| CYP704    | CYP704         | AY779540.1     | (Ro et al., 2005)         |
|           | CYP94B1        | NM_125740.3    | (Tabata et al., 2000)     |
|           | CYP94B2        | NM_111056.3    | (Salanoubat et al., 2000) |
| CYP94     | CYP94B3        | NM_114710.3    | (Salanoubat et al., 2000) |
|           | CYP94C1        | NM_128328.3    | (Lin et al., 1999)        |
|           | CYP94N1v2      | KJ869255.1     | (Augustin et al., 2015)   |
|           | CYP86A1        | MF197861.1     | (Shi et al., 2018)        |
| CYP86     | CYP86A2        | NM_116260.4    | (Mayer et al., 1999)      |
|           | CYP86B1        | NM_122225.3    | (Tabata et al., 2000)     |
|           | CYP86C1        | NM_102298.3    | (Theologis et al., 2000)  |
| CYP96     | CYP96A1        | NM_127882.3    | (Lin et al., 1999)        |
|           | CYP96C1        | AJ238402.1     | (Oudin et al., 1999)      |
|           | CYP96A2        | NM_119369.4    | (Mayer et al., 1999)      |
| CYP96     | CYP96A3        | NM_105208.1    | (Theologis et al., 2000)  |
|           | CYP88D6        | MG888351.1     | unpublished               |
|           | CYP88A3        | NM_100394.4    | (Theologis et al., 2000)  |
| CYP716    | CYP716A52v2    | JX036032.1     | (Han et al., 2012)        |
|           | CYP716A83      | KU878849.1     | unpublished               |
|           | CYP716A86      | KU878848.1     | unpublished               |
|           | CYP716A14v2    | KF309251.1     | unpublished               |
|           | CYP716A140     | KU878853.1     | unpublished               |
|           | CYP716A15      | AB619802.1     | (Fukushima et al., 2011)  |
|           | CYP716A179     | LC157867.1     | (Tamura et al., 2016)     |
|           | CYP716A113v1   | KU878866.1     | unpublished               |
|           | CYP716A111     | KY047600.1     | unpublished               |
|           | CYP716A1       | NM_123002.2    | (Tabata et al., 2000)     |
| CYP716    | CYP716A2       | NM_123005.2    | (Tabata et al., 2000)     |
|           | CYP716A141     | KU878855.1     | (Tamura et al., 2017)     |
|           | CYP716Y1       | KC963423.1     | (Moses et al., 2014)      |

|        |             |                |                           |
|--------|-------------|----------------|---------------------------|
|        | CYP716A53v2 | JX036031.1     | (Han et al., 2012)        |
|        | CYP716A47   | JN604536.1     | (Han et al., 2011)        |
|        | CYP716D58   | LC209201.1     | (Tamura et al., 2017)     |
|        | CYP90G1v3   | KJ869260.1     | (Augustin et al., 2015)   |
|        | CYP90B27v1  | KJ869252.1     | (Augustin et al., 2015)   |
| CYP90  | CYP90A1     | GU326353.1     | unpublished               |
|        | CYP90B1     | KX168703.1     | unpublished               |
|        | CYP90C1     | NM_001342408.1 | (Mayer et al., 1999)      |
|        | CYP90B3     | AB244039.1     | unpublished               |
|        | CYP707A1    | AB122149.1     | (Saito et al., 2004)      |
| CYP707 | CYP707A2    | NM_128466.4    | (Lin et al., 1999)        |
|        | CYP707A3    | AB122150.1     | (Saito et al., 2004)      |
|        | SmCYP85A1   | KP337712.1     | (Chen et al., 2014)       |
|        | CYP85A2     | AB087801.1     | (Nomura et al., 2005)     |
| CYP85  | CYP85A3     | NM_001247591.1 | (Nomura et al., 2005)     |
|        | NtCYP85A1   | DQ649022.1     | unpublished               |
|        | SlCYP85A1   | NM_001329859.1 | (Li et al., 2016)         |
| CYP720 | CYP720      | KJ624415.1     | (Pham et al., 2016)       |
| CYP724 | CYP724A1    | NM_121444.4    | (Tabata et al., 2000)     |
|        | CYP724B2    | AB244038.1     | (Aoki et al., 2010)       |
|        | CYP87D16    | KF318735.1     | unpublished               |
| CYP87  | CYP87A2     | NM_001198045.1 | (Theologis et al., 2000)  |
| CYP722 | CYP722A1    | NM_101819.6    | (Theologis et al., 2000)  |
| CYP718 | CYP718      | NM_129846.3    | (Lin et al., 1999)        |
| CYP708 | CYP708A2    | NM_001344755.1 | (Tabata et al., 2000)     |
|        | CYP72A63    | AB558146.1     | (Seki et al., 2011)       |
|        | CYP72A154   | AB558153.1     | (Seki et al., 2011)       |
|        | CYP72A15    | NM_112330.4    | (Salanoubat et al., 2000) |
| CYP72  | CYP72A67    | DQ335780.1     | (Li et al., 2007)         |
|        | CYP72A68    | DQ335782.1     | (Li et al., 2007)         |
|        | CYP72C1     | NM_001332275.1 | (Theologis et al., 2000)  |
|        | CYP72A129   | JN604542.1     | (Han et al., 2011)        |
|        | CYP72B1     | NM_128228.4    | (Salanoubat et al., 2000) |
| CYP709 | CYP709B1    | NM_130264.2    | (Lin et al., 1999)        |
|        | CYP709B2    | MF463434.1     | (Chen et al., 2018)       |
| CYP735 | CYP735A1    | NM_123206.3    | (Tabata et al., 2000)     |
|        | CYP735A2    | NM_105381.5    | (Theologis et al., 2000)  |
|        |             |                | (Ohnishi et al., 2006;    |
| CYP734 | CYP734A7    | NM_001247011.2 | Vasav and Barvkar, 2019)  |
|        | CYP734A8    | NM_001247808.2 | (Ohnishi et al., 2006)    |
| CYP715 | CYP715A1    | NC_003076.8    | (Tabata et al., 2000)     |
| CYP721 | CYP721A1    | NM_106169.4    | (Theologis et al., 2000)  |
| CYP714 | CYP714A1    | NM_122400.3    | (Tabata et al., 2000)     |
|        | CYP714A2    | NM_122399.3    | (Tabata et al., 2000)     |

|        |            |                |                                              |
|--------|------------|----------------|----------------------------------------------|
| CYP749 | CYP749A20  | JN604538.1     | (Han et al., 2011)                           |
| CYP73  | CYP73A19   | NM_001279222.2 | (Overkamp et al., 2000)                      |
|        | CYP73A100  | JN604543.1     | (Han et al., 2011)                           |
| CYP98  | SbCYP98A1  | AF029856.1     | (Bak et al., 1998)                           |
|        | SbCYP98A12 | AJ583532.1     | (Morant et al., 2007)                        |
| CYP736 | CYP736A12  | JN604539.1     | (Han et al., 2011)                           |
| CYP78  | CYP78A5    | NM_101240.4    | (Theologis et al., 2000)                     |
| CYP703 | CYP703A2   | NM_100010.3    | (Theologis et al., 2000)                     |
| CYP75  | EoCYP75    | HQ268505.1     | unpublished                                  |
|        | EgCYP75    | U72654.2       | unpublished                                  |
|        | CYP76AH1   | JX422213.1     | (Guo et al., 2013)                           |
|        | CYP76M6    | Q6Z517         | (International Rice Genome Sequencing, 2005) |
| CYP76  | CYP76AH3   | KR140168.1     | (Guo et al., 2016a)                          |
|        | CYP76AK1   | KR140169.1     | (Guo et al., 2016a)                          |
|        | CYP76A26   | KF591593.1     | (Salim et al., 2014)                         |
|        | CYP76C3    | NM_130120.4    | (Lin et al., 1999)                           |
|        | CYP76A47   | MH124060.1     | (Wang et al., 2019)                          |
| CYP77  | CYP77A4    | NM_120548.3    | (Tabata et al., 2000)                        |
|        | CYP77B1    | NM_101033.4    | (Theologis et al., 2000)                     |
| CYP92  | CYP92      | KC841857.1     | unpublished                                  |
|        | CYP71D353  | KF460438.1     | (Krokida et al., 2013)                       |
|        | CYP71A16   | NM_123623.5    | (Tabata et al., 2000)                        |
|        | CYP71AV9   | KF752453.1     | (Eljounaidi et al., 2014)                    |
|        | CYP71E1    | AF029858.1     | (Kahn et al., 1997)                          |
| CYP71  | CYP71D313  | JN604541.1     | (Han et al., 2011)                           |
|        | CYP71D1V1  | JN613015.1     | (Huang et al., 2012)                         |
|        | CYP71BE52  | KT157042.1     | (Triikka et al., 2015)                       |
|        | CYP71Z18   | NM_001147894.2 | (Mao et al., 2016)                           |
|        | CYP71B31   | NM_115190.1    | (Salanoubat et al., 2000)                    |
| CYP706 | CYP706A1   | NM_118395.3    | (Mayer et al., 1999)                         |
|        | CYP706A2   | NM_118397.4    | (Mayer et al., 1999)                         |
| CYP84  | CYP84A4    | NM_120515.3    | (Weng et al., 2012)                          |
| CYP79  | CYP79A118  | KX931079.1     | unpublished                                  |
|        | CYP81G1    | NM_126131.4    | (Tabata et al., 2000)                        |
|        | CYP81D1    | NM_123013.4    | (Tabata et al., 2000)                        |
| CYP81  | CYP81F2    | NM_125104.3    | (Tabata et al., 2000)                        |
|        | CYP81E11   | DQ340238.1     | unpublished                                  |
|        | CYP81H1    | NM_119895.4    | (Mayer et al., 1999)                         |
|        | CYP81K1    | NM_121099.4    | (Tabata et al., 2000)                        |
|        | CYP81K2    | NM_121098.3    | (Tabata et al., 2000)                        |
| CYP89  | CYP89A2    | U61231.1       | (Courtney et al., 1996)                      |
|        | CYP89A3    | NM_125525.1    | (Tabata et al., 2000)                        |

|        |          |                |                           |
|--------|----------|----------------|---------------------------|
|        | CYP93E1  | AF135485.1     | (Steele et al., 1999)     |
| CYP93  | CYP93E2  | DQ335790.1     | (Li et al., 2007)         |
|        | CYP93E3  | AB437320.1     | (Seki et al., 2008)       |
|        | CYP93E4  | KF906535.1     | unpublished               |
|        | CYP80    | CYP80          | U09610.1                  |
| CYP82  | CYP82G1  | NM_113423.4    | (Mayer et al., 1999)      |
|        | CYP82A2  | NM_001253148.1 | (Schopfer and Ebel, 1998) |
|        | CYP82C2  | NM_119348.2    | (Mayer et al., 1999)      |
|        | CYP82D47 | JN604545.1     | (Han et al., 2011)        |
| CYP99  | CYP99A3  | Q0JF01.1       | (Feng et al., 2002)       |
| CYP712 | CYP712A1 | NM_129787.2    | (Lin et al., 1999)        |
|        | CYP712A2 | NM_147845.2    | (Tabata et al., 2000)     |
| CYP83  | CYP83A1  | KP693684.1     | (Guo et al., 2016b)       |
|        | CYP83B1  | KU559565.1     | unpublished               |
|        | CYP83E8  | DQ340234.1     | unpublished               |
| CYP705 | CYP705A1 | NM_117621.5    | (Mayer et al., 1999)      |
|        | CYP705A5 | NM_124173.3    | (Tabata et al., 2000)     |

1267

1268

1269  
1270  
1271

**Supplementary Table 26.** The UGT genes used to construct phylogenetic tree in this research.

| Subfamily | Gene name         | GenBank number | Reference                          |
|-----------|-------------------|----------------|------------------------------------|
| UGT79     | GmUGT79B30        | NM_001359019.1 | (Shaokang Di, 2015)                |
|           | GmUGT79A6         | NM_001288595.2 | (Rojas Rodas et al., 2014)         |
|           | HvUGT13248        | GU170355.1     | (Wolfgang Schweiger, 2012)         |
|           | PhUGT79B31        | LC387490.1     | (Knoch et al., 2017)               |
|           | GmSGT2            | NM_001317455.2 | (Shibuya et al., 2010)             |
|           | GmSGT3            | NM_001253928.2 | (Shibuya et al., 2010)             |
| UGT91     | CaUGT91A1-like    | XP_027076440.1 | Bioproject:<br>PRJNA506972         |
|           | ItUGT91A1-like    | XP_031110113.1 | Bioproject:<br>PRJNA574454         |
|           | LsUGT91D1-like    | XP_023735445.1 | Bioproject:<br>PRJNA432228         |
|           | HaUGT91D1-like    | XP_022007978.1 | Bioproject:<br>PRJNA396063         |
|           | CcUGT91C1         | XP_024970787.1 | Bioproject:<br>PRJNA453787         |
|           | ItUGT91C1         | XP_031118563.1 | Bioproject:<br>PRJNA574454         |
| UGT94     | VpUGT94F1         | AB514127.1     | (Ono et al., 2010)                 |
|           | SiUGT94-related   | LC484019.1     | unpublished                        |
|           | SiUGT94-related-2 | LC484018.1     | unpublished                        |
|           | PgUGT94Q2         | JX898530.1     | (Jung et al., 2014)                |
| UGT89     | NaUGT89A2-like    | XM_019370589.1 | (Chen and Li, 2017)                |
|           | AtUGT89B1         | NM_106048.4    | (Theologis et al., 2000)           |
| UGT90     | AtUGT89C1         | Q9LNE6         | (Yonekura-Sakakibara et al., 2007) |
|           | HpUGT90A7         | EU561019.1     | (Witte et al., 2009)               |
|           | CtUGT90A14        | MH013340.1     | (Zhang et al., 2019)               |
|           | AtUGT73B1         | NM_119576.4    | (Lim et al., 2006)                 |
|           | AtUGT73B2         | AY339370.1     | (Lim et al., 2006)                 |
| UGT73     | AtUGT73B3         | NM_119574.3    | (Lim et al., 2006)                 |
|           | AtUGT73B4         | NM_001202600.1 | (Mazel and Levine, 2002)           |
|           | AtUGT73B5         | NM_127108.4    | (Mazel and Levine, 2002)           |
|           | AtUGT73C1         | NM_129230.3    | (Hou et al., 2004)                 |
|           | AtUGT73C2         | NM_129231.3    | (Lin et al., 1999)                 |
| UGT71     | AtUGT73C5         | NM_129235.4    | (Hou et al., 2004)                 |
|           | CtUGT71AE1        | MH013341.1     | (Zhang et al., 2019)               |
|           | AtUGT71D1         | NM_128527.4    | (Lin et al., 1999)                 |
|           | AtUGT71C1         | NM_128529.3    | (Hansen et al., 2009; Lim          |

---

|       |                |                |                                                |
|-------|----------------|----------------|------------------------------------------------|
|       | AtUGT71C2      | NM_128528.4    | et al., 2003)                                  |
|       | AtUGT71C3      | NM_100600.4    | (Hansen et al., 2009)                          |
|       | AtUGT71B1      | NM_113070.3    | (Xie et al., 2012)                             |
|       | PgUGT71A27     | AIZ00429.1     | (Salanoubat et al., 2000)                      |
|       | AtUGT71B6      | NM_113073.3    | unpublished                                    |
|       | ITUGT71B2      | MK704396.1     | (Priest et al., 2006)                          |
|       | AtUGT71B5      | NM_117616.2    | unpublished                                    |
|       | RsUGT72B14     | KX262844.1     | (Mayer et al., 1999)                           |
|       | AtUGT72B1      | NM_116337.3    | (Yu et al., 2011)                              |
|       | AtUGT72B3      | NM_001331274.1 | (Brazier-Hicks and<br>Edwards, 2005)           |
| UGT72 | AtUGT72C1      | NW_003302552.1 | (Lin et al., 2016)                             |
|       | AtUGT72E1      | NM_114934.2    | (Hu et al., 2011)                              |
|       | AtUGT72E2      | NM_126067.3    | (Lim et al., 2005)                             |
|       | AtUGT72E3      | NM_122532.3    | (Lanot et al., 2006; Lim et<br>al., 2005)      |
|       | AtUGT78D1      | NM_102790.4    | (Lanot et al., 2008; Lim et<br>al., 2005)      |
| UGT78 | AtUGT78D2      | NM_121711.5    | (Jones et al., 2003)                           |
|       | AtUGT78D3      | NM_121709.2    | (Kim et al., 2012)                             |
|       | GmUGT78K1      | GU434274.1     | (Yonekura-Sakakibara et<br>al., 2008)          |
|       | AtUGT85A2      | NM_102086.3    | (Kovinich et al., 2010)                        |
| UGT85 | TcUGT85A2      | EOX92065.1     | (Theologis et al., 2000)                       |
|       | AtUGT85A3      | NM_102088.3    | (Motamayor et al., 2013)                       |
|       | AtUGT85A5      | NM_202156.2    | (Theologis et al., 2000)                       |
|       | AtUGT85A7      | NM_102085.3    | (Theologis et al., 2000)                       |
|       | AtUGT76C1      | NM_120669.4    | (Theologis et al., 2000)                       |
|       | TaUGT76C1      | KY784575.1     | (Hou et al., 2004)                             |
|       | SIUGT76E1      | NM_001361347.1 | unpublished                                    |
| UGT76 | AtUGT76E1      | NM_125350.3    | (Sun et al., 2017)                             |
|       | AtUGT76E2      | NM_125351.3    | (Tabata et al., 2000)                          |
|       | AtUGT76E11     | NM_114534.3    | (Tabata et al., 2000)                          |
|       | AtUGT76E12     | NM_114533.2    | (Li et al., 2018a;<br>Salanoubat et al., 2000) |
|       | AtUGT76D1      | NM_128205.3    | (Salanoubat et al., 2000)                      |
|       | VrUGT87A2-like | XP_034687331.1 | (Lin et al., 1999)                             |
| UGT87 | VvUGT87A2      | RVX23022.2     | Bioproject:<br>PRJNA636344                     |
|       | CsUGT87A1-like | XP_028057899.1 | (Roach et al., 2018)                           |
|       | CaUGT87K1      | AUR26629.1     | Bioproject:<br>PRJNA524157                     |
|       | CaUGT87K2      | AUR26632.1     | unpublished                                    |
|       |                |                | unpublished                                    |

---

|                   |                 |                    |                            |
|-------------------|-----------------|--------------------|----------------------------|
| UGT86             | NtUGT86A1-like  | XP_009610181.1     | Bioproject:<br>PRJNA257218 |
|                   | CsUGT86A1-like  | XP_028052942.1     | Bioproject:<br>PRJNA524157 |
| UGT74             | AtUGT74B1       | NM_102256.3        | (Theologis et al., 2000)   |
|                   | AtUGT74F1       | NM_129946.3        | (Lin et al., 1999)         |
|                   | AtUGT74F2       | NM_129944.3        | (Lin et al., 1999)         |
|                   | PgUGTP74AE2     | JX898529.1         | (Jung et al., 2014)        |
|                   | AtUGT74D1       | NM_128733.5        | (Tanaka et al., 2014)      |
|                   | AtUGT74E2       | NM_100448.4        | (Theologis et al., 2000)   |
|                   | SIUGT75C1       | NM_001361345.1     | (Aoki et al., 2010)        |
| UGT75             | AtUGT75B1       | NM_100435.3        | (Theologis et al., 2000)   |
|                   | AtUGT75B2       | NM_100432.2        | (Theologis et al., 2000)   |
|                   | AkUGT75W2       | AWU66066.1         | (Sun et al., 2018)         |
| UGT84             | AtUGT84A1       | NM_117638.3        | (Mayer et al., 1999)       |
|                   | AtUGT84A2       | NM_113051.3        | (Salanoubat et al., 2000)  |
| UGT709            | AtUGT84B1       | NM_127890.3        | (Lin et al., 1999)         |
|                   | CrUGT709C2      | KF302068.1         | (Miettinen et al., 2014)   |
| UGT95             | CaUGT709L1      | AUR26631.1         | unpublished                |
| UGT95             | PgUGT95B2       | MH507175.1         | (Wilson et al., 2019)      |
| UGT708            | CsUGT708C1-like | XP_028096648.1     | Bioproject:<br>PRJNA524157 |
|                   | PpUGT708C1      | XP_007216617.1     | Bioproject:<br>PRJNA241430 |
| UGT80             | LhUGT80A2       | XM_031153760.1     | unpublished                |
|                   | AtUGT80B1       | NM_001084205.2     | (Theologis et al., 2000)   |
|                   | AtUGT80         | KJ396595.1         | unpublished                |
|                   | AtUGT80A2       | NM_001337686.1     | (Salanoubat et al., 2000)  |
|                   | PgUGT1          | KF377585.1         | (Yan et al., 2014)         |
|                   | PgUGT3          | AIE12480.1         | (Yan et al., 2014)         |
|                   | PgUGT4          | AIE12477.1         | (Yan et al., 2014)         |
|                   | PgUGT7          | AIE12476.1         | (Yan et al., 2014)         |
|                   | PgUGT16         | AIE12486.1         | (Yan et al., 2014)         |
|                   | PgUGT17         | AKA44597.1         | (Wang et al., 2015)        |
|                   | PgUGT25         | AKA44595.1         | (Wang et al., 2015)        |
|                   | PgUGT33         | AKA44590.1         | (Wang et al., 2015)        |
|                   | PgUGT39         | AKA44591.1         | (Wang et al., 2015)        |
|                   | PgUGT100        | AKQ76388.1         | (Wei et al., 2015)         |
|                   | PgUGT101        | KP795114.1         | (Wei et al., 2015)         |
|                   | PgUGT102        | KP795115.1         | (Wei et al., 2015)         |
| PgUGT103          | KP795116.1      | (Wei et al., 2015) |                            |
| <i>P. ginseng</i> | PgUGTPg29       | KM401911.1         | (Wang et al., 2015)        |
|                   | PgUGTPg45       | KM401918.1         | (Wang et al., 2015)        |
|                   | PgUGT11         | AIE12482.1         | (Yan et al., 2014)         |



|        |                                           |                |                            |
|--------|-------------------------------------------|----------------|----------------------------|
|        | PgUGT12                                   | AIE12481.1     | (Yan et al., 2014)         |
|        | PgUGTPg36                                 | AKA44596.1     | (Wang et al., 2015)        |
|        | PgUGTPg37                                 | AKA44583.1     | (Wang et al., 2015)        |
| UGT83  | VrUGT83A1-like                            | XP_034705962.1 | Bioproject:<br>PRJNA636344 |
|        | VvUGT83A1                                 | RVW82717.1     | (Roach et al., 2018)       |
|        | PtUGT83A1                                 | XP_002306038.2 | Bioproject: PRJNA17973     |
| UGT82  | VrUGT82A1                                 | XP_034676882.1 | Bioproject:<br>PRJNA636344 |
|        | MrUGT82A1                                 | KAB1210460.1   | (Jia et al., 2019)         |
|        | Zj<br>arabinosyltransferase RRA3-like     | XP_015866879.1 | Bioproject:<br>PRJNA315994 |
|        | Cs<br>arabinosyltransferase RRA3-like     | XP_028093686.1 | Bioproject:<br>PRJNA524157 |
|        | To Nucleotide-diphospho-sugar transferase | PON84914.1     | unpublished                |
|        | Ac Beta-1,4-xylosyltransferase            | PSS36057.1     | unpublished                |
|        | Cs Beta-1,4-xylosyltransferase IRX14      | XP_028090508.1 | Bioproject:<br>PRJNA524157 |
|        | Cs UDP-glucosyltransferase                | AYQ58374.1     | unpublished                |
| Others | Ac Zeatin O-glucosyltransferase           | PSS15686.1     | unpublished                |
|        | Ac Zeatin O-glucosyltransferase-2         | PSS01783.1     | unpublished                |
|        | Mc Glycosyl transferase                   | OVA05033.1     | (Liu et al., 2017)         |
|        | Vr galacturonosyltransferase-like 3       | XP_034701103.1 | Bioproject:<br>PRJNA636344 |
|        | Ac Beta-1,4-xylosyltransferase IRX9H      | PSS01196.1     | unpublished                |
|        | Jr galacturonosyltransferase 8-like       | XP_018807381.1 | Bioproject:<br>PRJNA350852 |
|        | Cs galacturonosyltrans                    | XP_028115305.1 | (Li et al., 2017)          |

---

|                                           |                |                            |
|-------------------------------------------|----------------|----------------------------|
| ferase 8-like                             |                |                            |
| Ls beta-1,4-xylosyltransferase IRX10L     | XP_023744067.1 | Bioproject:<br>PRJNA432228 |
| Cc xyloglucan 6-xylosyltransferase 2-like | XP_024996410.1 | Bioproject:<br>PRJNA453787 |
| Ls xyloglucan 6-xylosyltransferase 2-like | XP_023760243.1 | Bioproject:<br>PRJNA432228 |
| Vr UDP-rhamnose:rhamnosyltransferase 1    | XP_034708582.1 | Bioproject:<br>PRJNA636344 |
| Vr UDP-rhamnose:rhamnosyltransferase 2    | XP_034708677.1 | Bioproject:<br>PRJNA636344 |

---

1272

1273

| Genes   | Primers      | Sequence (5' to 3')        |
|---------|--------------|----------------------------|
| PnUGT1  | Seq1091.2-F  | ATGAAGTCAGAATTGATATTCTTGC  |
|         | Seq1091.2-R  | TTACATAATTTCTCAAATAGCTTC   |
| PnUGT2  | Seq1751.3-F  | ATGGATAACCAAAAAGGTAGAATCA  |
|         | Seq1751.3-R  | CTATTGTGCATCTTTCTTCTTCTTA  |
| PnUGT3  | Seq2311.15-F | ATGAAGTCAGAATTGATATTCGTGC  |
|         | Seq2311.15-R | TCACATAATTTCTCAAATAGTTTC   |
| PnUGT4  | Seq3403.8-F  | ATGGATATCGAAAAAGGTAGAATCA  |
|         | Seq3403.8-R  | TTAATATTGTGCGTCTTTCTTCATC  |
| PnUGT5  | Seq574.8-F   | ATGTTGAGCAAACTCACATTATGT   |
|         | Seq574.8-R   | TCAGGAGGACACAAGCTTTGAAATG  |
| PnUGT6  | Seq1424.9-F  | ATGGTTTCTATTCGGAGAACATTGT  |
|         | Seq1424.9-R  | TCAAAAAATTGTGGTATGAGGAACA  |
| PnUGT7  | Seq1517.4-F  | ATGCTGGAGCAGTGTTTGGGACAAC  |
|         | Seq1517.4-R  | TTATACCTTGACGGCTTTAAATGCA  |
| PnUGT8  | Seq1543.17-F | ATGGCAGGTCGTAGTAGAGACGGTC  |
|         | Seq1543.17-R | TTACTGTTCTGAACCATCAGGGAAG  |
| PnUGT9  | Seq1607.6-F  | ATGGACTCACAAGTCTCATCACGTC  |
|         | Seq1607.6-R  | TTACTGATCTGATCGTTCCTCTCTC  |
| PnUGT10 | Seq1625.69-F | ATGAGGAACTGGAGTTGGGGTTTTG  |
|         | Seq1625.69-R | CTACCATGGTTTGAGGTCTCCCATG  |
| PnUGT11 | Seq1743.56-F | ATGGATACGACAAGGCGGAAGGCGG  |
|         | Seq1743.56-R | TCAAAAACAATACTGAATTAAC TTT |
| PnUGT12 | Seq1790.11-F | ATGGATGGCAAGAGCCTTCACATAG  |
|         | Seq1790.11-R | CTAGGAGGCTACGAGAAGGTCTTGC  |
| PnUGT13 | Seq1935.39-F | ATGAAGAAGCTGAAGAGCTTTTACA  |
|         | Seq1935.39-R | CTATTTGCACTGCATTGGTCGGAAC  |
| PnUGT14 | Seq1965.8-F  | ATGGAGTCTCCGAATAGACCTCATG  |
|         | Seq1965.8-R  | TTAAGGTTTGCTAATATTTTTTCCA  |
| PnUGT15 | Seq1975.16-F | ATGATCCCCCTCTCCGAAATCGCCC  |
|         | Seq1975.16-R | TTATGCTTTCTCCCTTTTCTCTCTG  |
| PnUGT16 | Seq2001.6-F  | ATGGGTCAGCTTAATGTGTTCTTTT  |
|         | Seq2001.6-R  | TCAAGAATGATTAGAACTCAATTCT  |
| PnUGT17 | Seq2096.16-F | ATGGCTATTCTCAAACCCAAGACC   |
|         | Seq2096.16-R | TCATTTCAATTTAGTTGTTCCACG   |
| PnUGT18 | Seq2308.20-F | ATGAAGCTCTCTGCGCTGCAGCAGA  |
|         | Seq2308.20-R | CTACTTCTTACTGGTATGGCTTGCA  |
| PnUGT19 | Seq312.4-F   | ATGGCGAACACGACGACGTTTCGAA  |
|         | Seq312.4-R   | TTAGAGACCAAAAATTGCAGGCCTGG |
| PnUGT20 | Seq3221.1-F  | ATGCCACCAAACTCCACCTCCCAA   |
|         | Seq3221.1-R  | TCAGCTGTCAGAATACAAATATTCA  |
| PnUGT21 | Seq3651.4-F  | ATGAAGAACTCAGAATTGGTATTTCG |

---

|         |              |                           |
|---------|--------------|---------------------------|
|         | Seq3651.4-R  | TCACATGATCTCCTCAATTAGTTTC |
| PnUGT22 | Seq3959.10-F | ATGAAGCTCTCTGCGCTACAGCAGA |
|         | Seq3959.10-R | CTACTTCTCACTGGTATGGCTTGCA |
| PnUGT23 | Seq4354.2-F  | ATGGAAAATAACCACGTTCTTCATG |
|         | Seq4354.2-R  | TAACTCATCAATTGGGATTTCTC   |
| PnUGT24 | Seq4407.1-F  | ATGGCTCAACAAACAATCCCACCTC |
|         | Seq4407.1-R  | CTAGGGTGTGATGCCACCCAAAGTC |
| PnUGT25 | Seq4424.12-F | ATGCCAACACAGAAATACTCAACCC |
|         | Seq4424.12-R | TTATTGTTTAGATTTACACCCATT  |
| PnUGT26 | Seq4424.13-F | ATGGAGAAAAAGGACTCAACTCGAC |
|         | Seq4424.13-R | TCATCTCTCCACACCCATCAATTTA |
| PnUGT27 | Seq4424.15-F | ATGGCTGAACAAACAATCCCACCTC |
|         | Seq4424.15-R | CTAGGCTCTGATGCCACCCACAGTC |
| PnUGT28 | Seq4424.16-F | ATGGATCAACCAGCAGCCGAACCTC |
|         | Seq4424.16-R | TTAGCTACGCAAACTACAGCCATC  |
| PnUGT29 | Seq4481.73-F | ATGGCAACTGAAGACCCTAAACTCC |
|         | Seq4481.73-R | TTATCCATTTTTTGATTTCTCAAAA |
| PnUGT30 | Seq4702.22-F | ATGGAGATTAACCGGCATAGGAAGC |
|         | Seq4702.22-R | TTATTTTGTATGATTTTCAAGATAC |
| PnUGT31 | Seq5047.49-F | ATGGGCTCCCTTCCTAAAGTAACTA |
|         | Seq5047.49-R | CTACTTTGCTAACACACCTGATCC  |
| PnUGT32 | Seq5124.21-F | ATGGTGGGTCGTAAAGAGAAGAGCA |
|         | Seq5124.21-R | TTATTGCGTATTTGTTTGCCAGTCA |

---
